# Supplementary material for: Lithiation of organic polysulfides: insight into embedding site preference and lithium storage capability from DFT calculations
Source: Royal Society of Chemistry journal article supplement (doi:10.1039/d4nj04198d), 2024-01-01
Supplement: d4nj04198d1.pdf [file d4nj04198d1.pdf]

## Electronic Supplementary Information

### **Lithiation of organic polysulfides: insight into embedding site preference and lithium storage capability from DFT calculations**

Junyi Liu, Lin Zhang and Zexing Cao\*

---

*State Key Laboratory of Physical Chemistry of Solid Surfaces and Fujian Provincial Key Laboratory of Theoretical and Computational Chemistry, College of Chemistry and Chemical Engineering, Xiamen University, Xiamen, China, 361005, China.*

Email: [zxcao@xmu.edu.cn](mailto:zxcao@xmu.edu.cn)

## **AIMD simulations:**

Ab initio molecular dynamics (AIMD) simulations were performed using the Vienna ab initio simulation package (VASP) to investigate the stability of cyclic OPSs (I~IV) at 298, 500 and 700 K.<sup>1, 2</sup> The cyclic OPSs (I~IV) molecules were confined within a cubic cell measuring  $20 \times 20 \times 20 \text{ \AA}$ , with a vacuum distance of over  $10 \text{ \AA}$  to avoid interactions between molecules in adjacent cells. In these simulations, the core electrons were described using the projector augmented wave (PAW)<sup>3</sup> method, while the valence electrons were treated by plane-wave basis sets of 500 eV cutoff kinetic energy. The exchange–correlation potential was treated using generalized gradient approximation (GGA) with the Perdew–Burke–Ernzerh of (PBE).<sup>4</sup> The Brillouin-zone sampling was limited to the  $\Gamma$ -point. Atomic geometries were optimized using a conjugate gradient algorithm until the residual forces on atoms were reduced to less than  $0.02 \text{ eV \AA}^{-1}$ . These simulations utilized exact Hellmann–Feynman forces and applied the canonical ensemble statistics to the motion of atomic nuclei via a Nosé thermostat.<sup>5</sup> Newton's equations of motion were integrated using the Verlet algorithm, with a total simulation time of 10 ps and a time step of 1 fs.

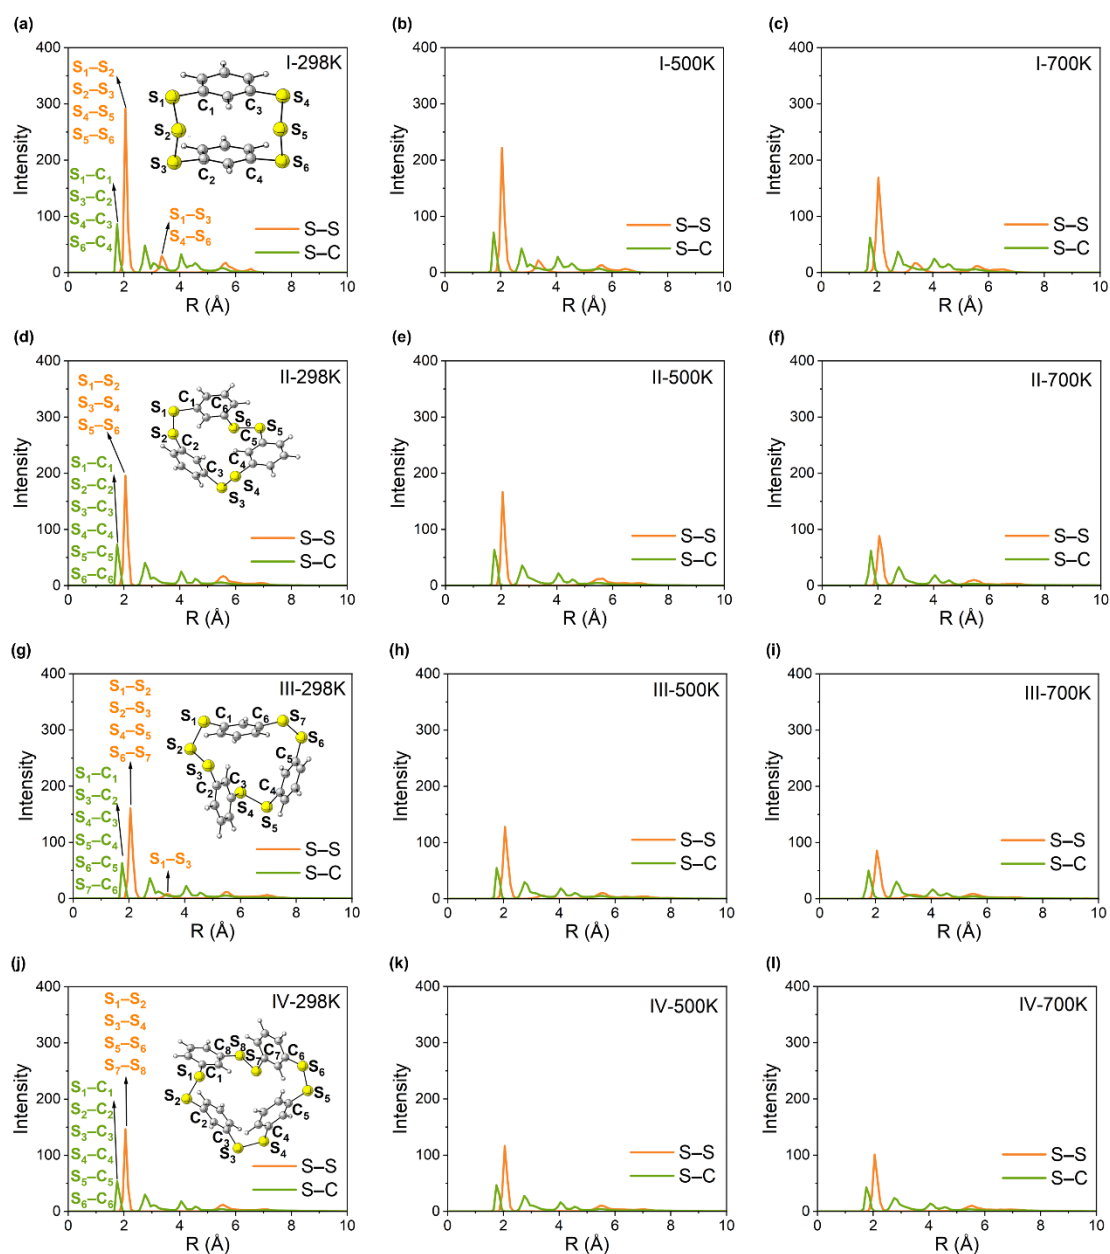

**Fig. S1** Radial distribution of selected interatomic distances for cyclic OPSs (I~IV) at 298, 500 and 700 K, respectively.

To investigate the structural stability of cyclic OPSs (I~IV), AIMD simulations were performed using VASP for 10 ps with a time step of 1 fs, at temperatures of 298, 500, and 700 K, respectively. The radial distribution of selected interatomic distances for cyclic OPSs (I~IV) is depicted in Fig. S1. During the AIMD simulations, the characteristic peaks of the main S–S and S–C bonds in OPSs (I~IV) remained nearly consistent across the temperatures

considered. Meanwhile, compared to 298 K, the intensity of the S–S bond peaks exhibits a slight decrease, attributed to the relatively larger changes in atomic distances at elevated temperatures (500 and 700 K). Overall, the AIMD simulations suggest that cyclic OPSs (I~IV) demonstrate a degree of kinetic and thermal stability.

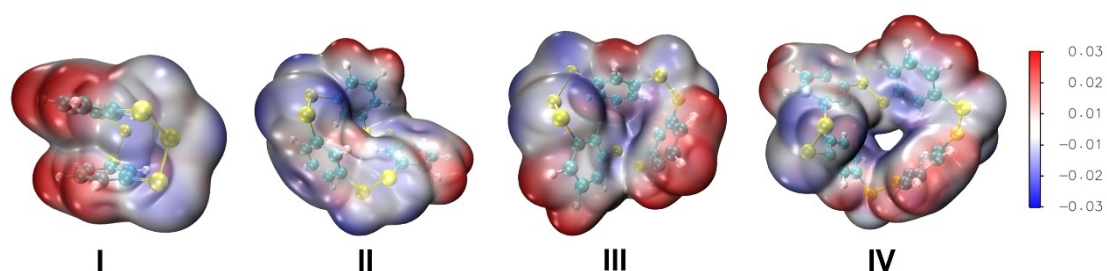

**Fig. S2** Molecular electrostatic potentials for the cyclic OPSs (I~IV). The red and blue isosurfaces (in a.u.) denote the positive and negative electrostatic potential regions, respectively.

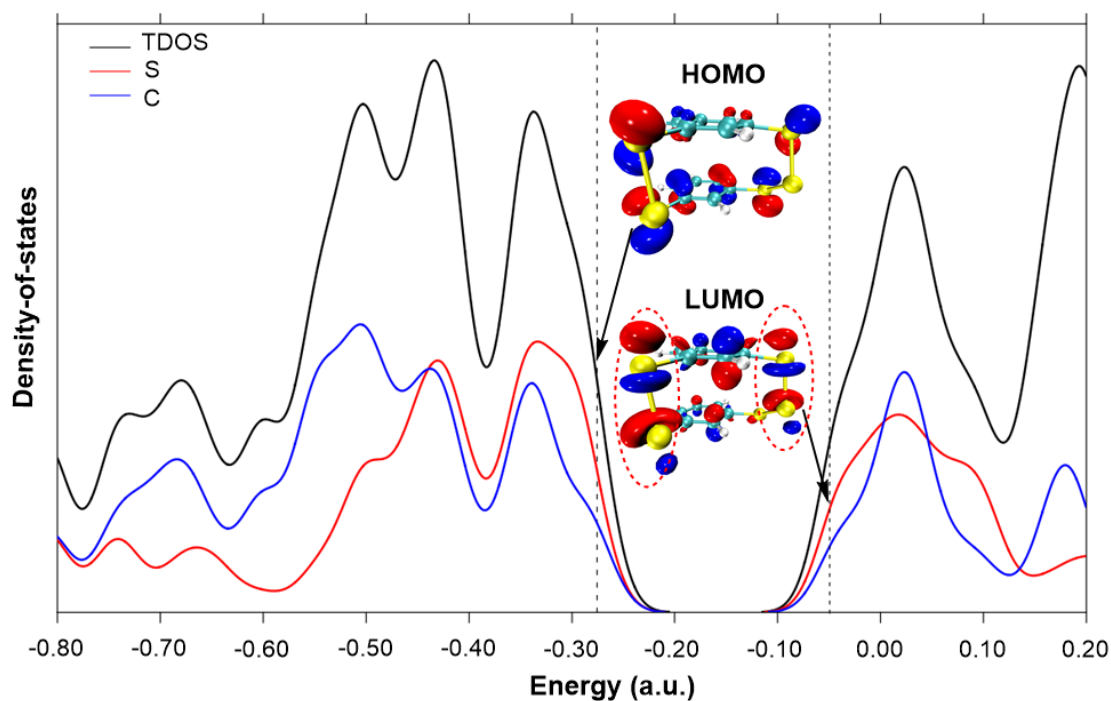

**Fig. S3** Total and partial (S and C atoms) density-of-states map of OPS (I).

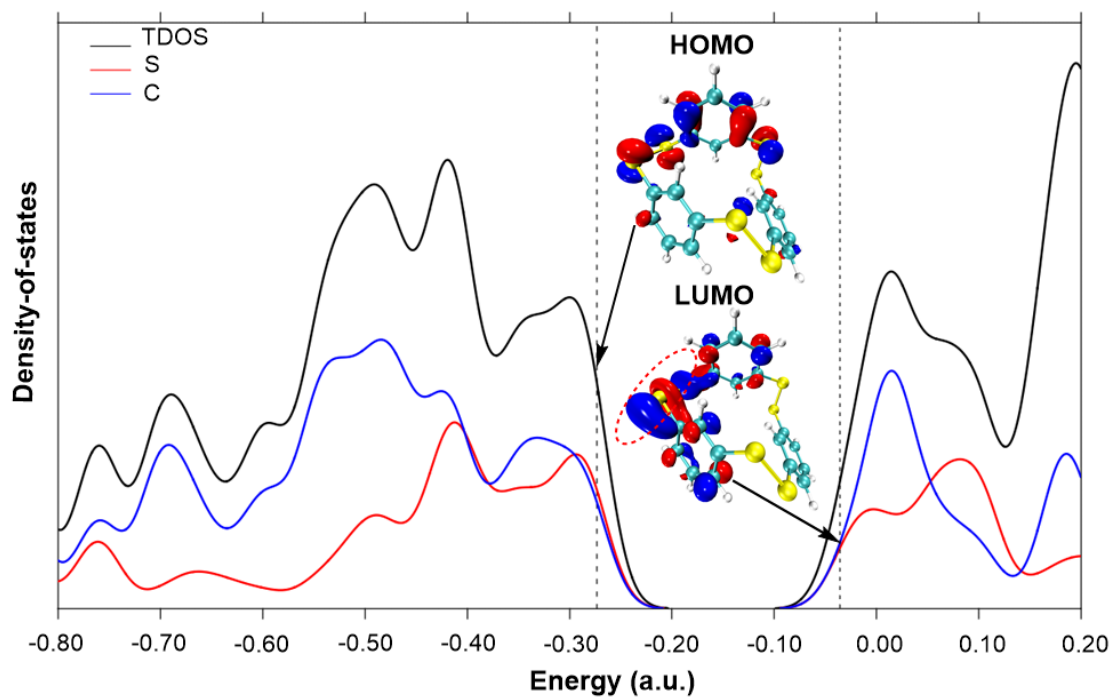

**Fig. S4** Total and partial (S and C atoms) density-of-states map of OPS (II).

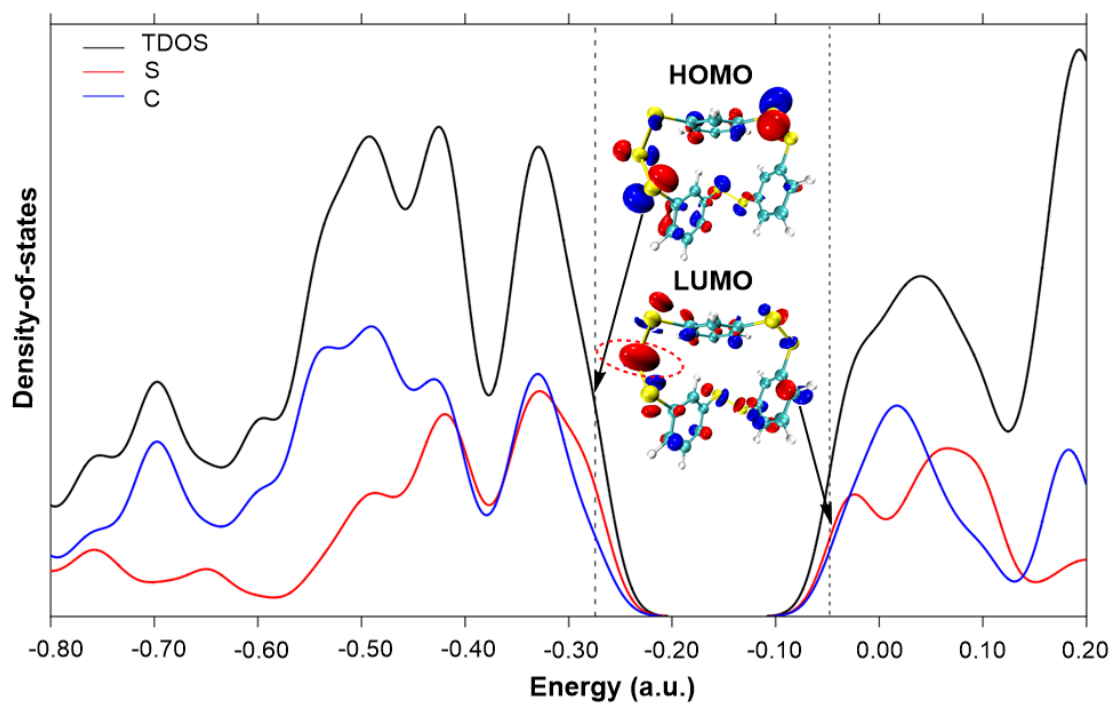

**Fig. S5** Total and partial (S and C atoms) density-of-states map of OPS (III).

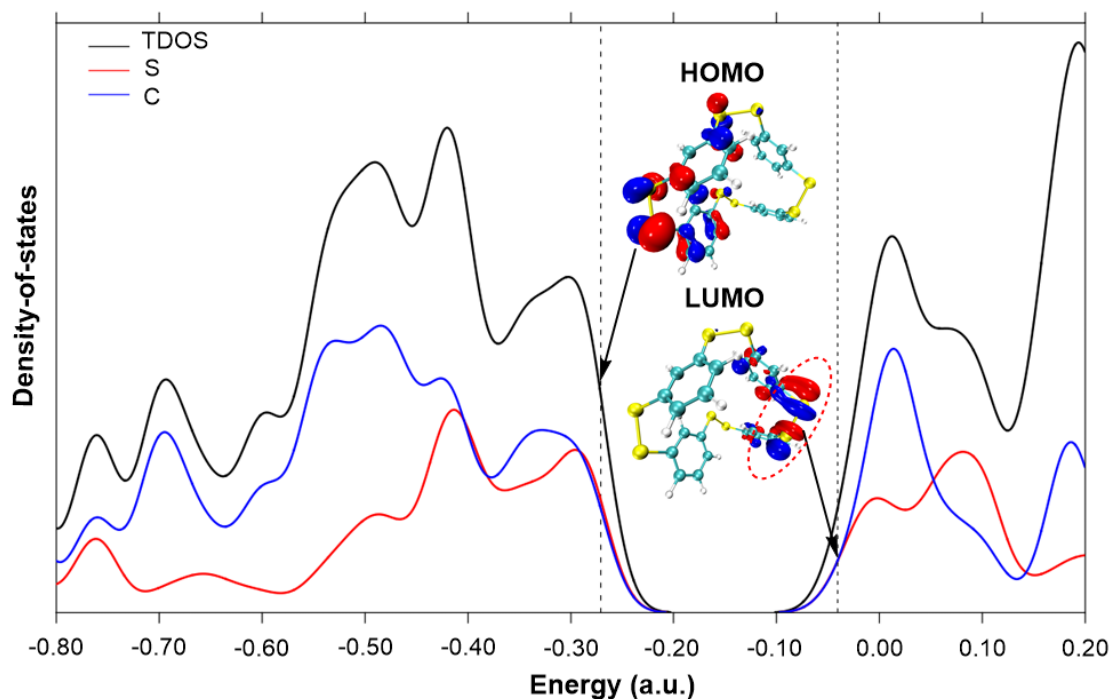

**Fig. S6** Total and partial (S and C atoms) density-of-states map of OPS (IV).

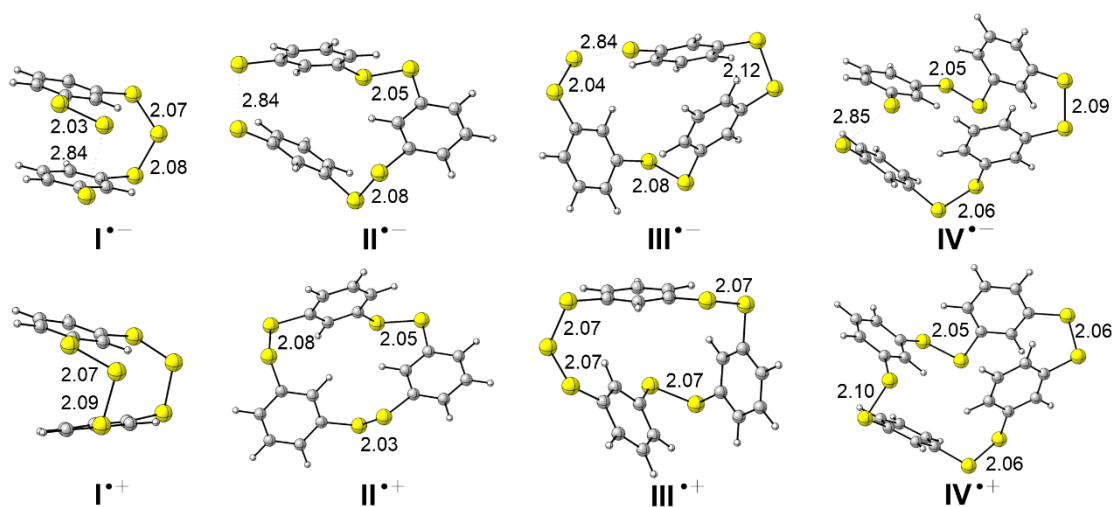

**Fig. S7** Optimized structures of cyclic OPSs (I-IV) and their key charged states. The key inter-atomic and bond lengths (in Å, black) are given.

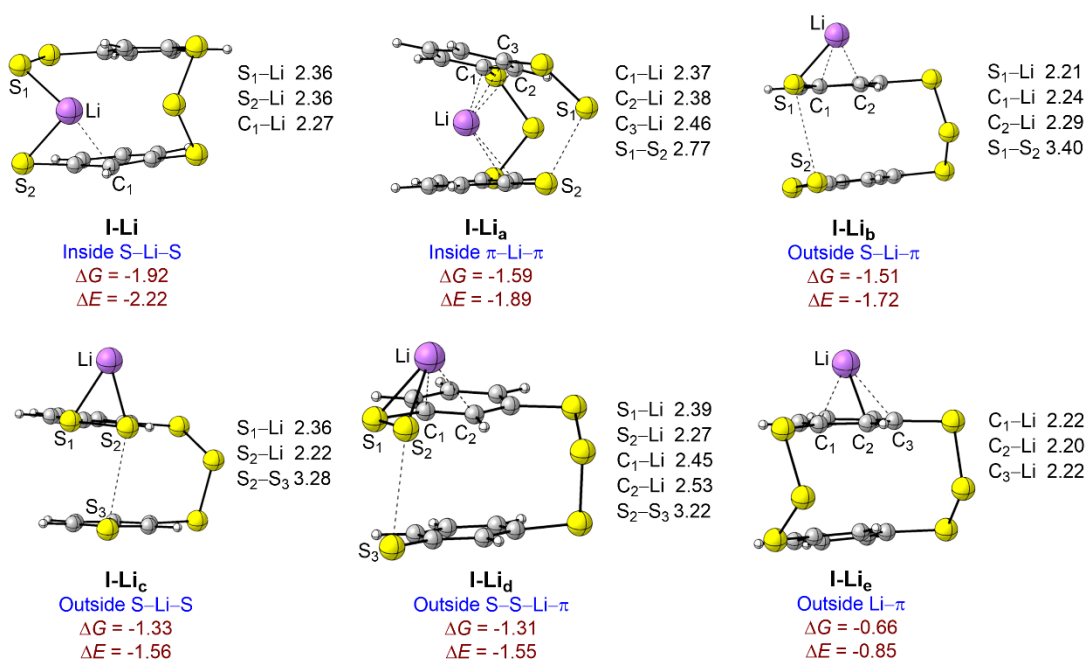

**Fig. S8** Lithiation free energies ( $\Delta G$ , in eV) and electronic energies ( $\Delta E$ , in eV) of **I-Li** species in different configurations were compared at the UM06-2X-D3/cc-pVTZ level. The key bond lengths (in Å, black) are given.

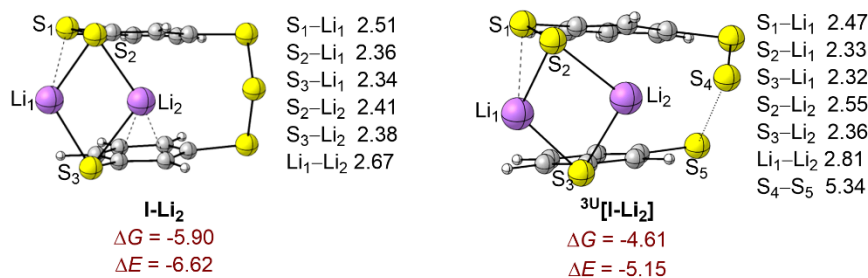

**Fig. S9** Optimized structures, lithiation free energies ( $\Delta G$ , in eV) and electronic energies ( $\Delta E$ , in eV) of closed-shell singlet states (**I-Li<sub>2</sub>**) and triplet states (**<sup>3</sup>U[I-Li<sub>2</sub>]**) of the LiPSs (**I-Li<sub>2</sub>**) at the (U)M06-2X-D3/cc-pVTZ level. The key bond lengths (in Å, black) are given.

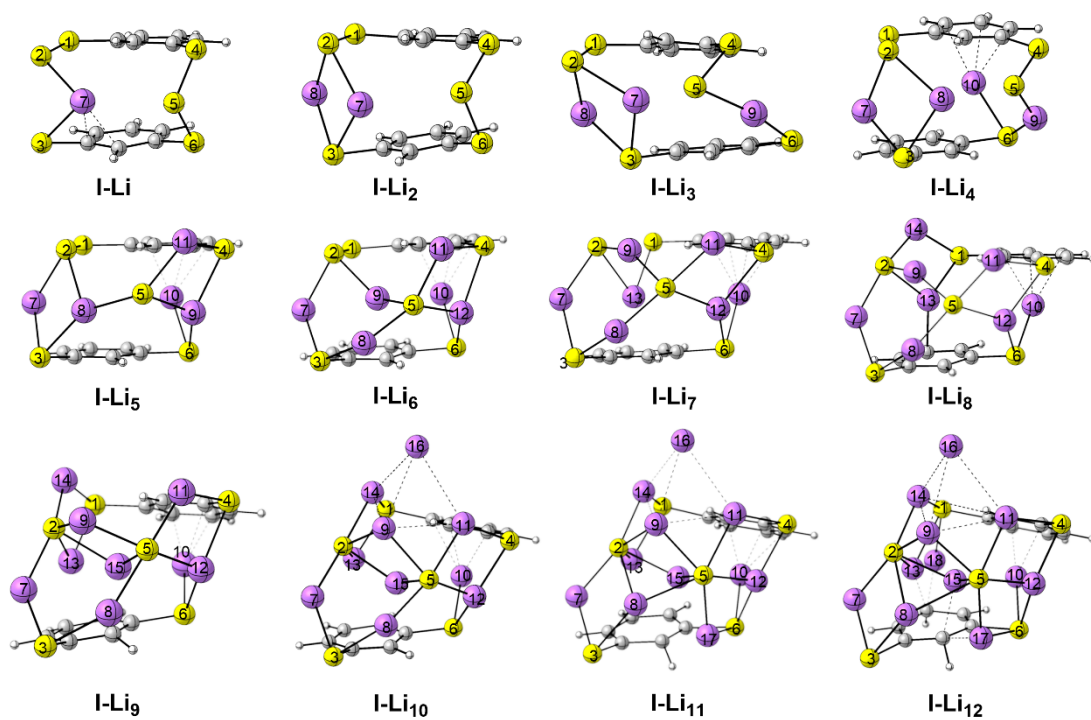

**Fig. S10** Geometric structures for LiPSs (I-Li~I-Li<sub>12</sub>).



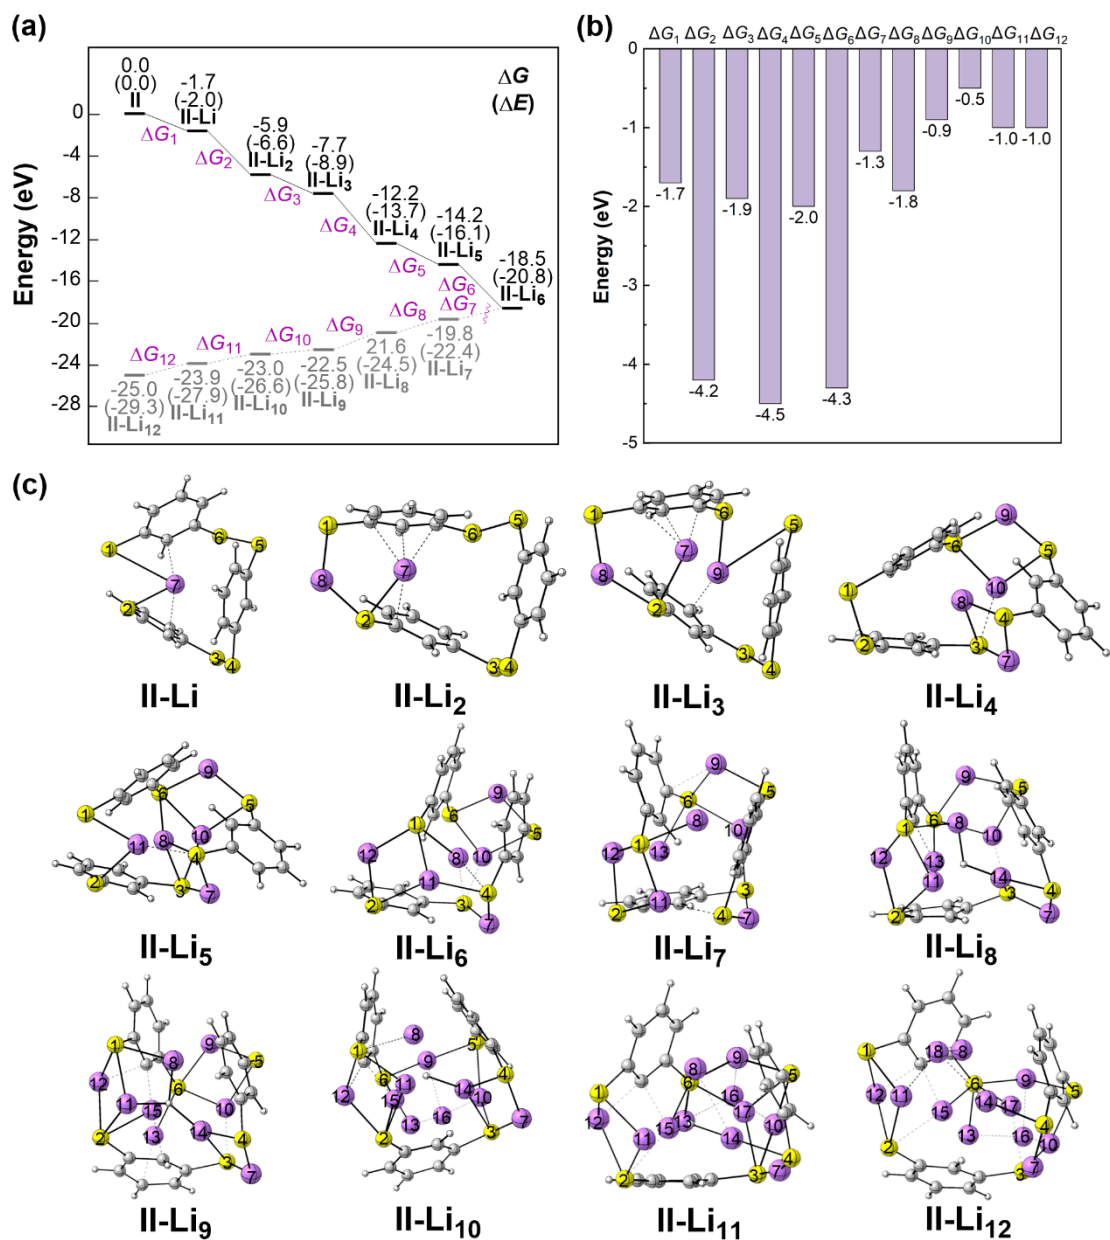

**Fig. S11** Relative Gibbs free energies ( $\Delta G$ , in eV) and the geometric structures involving the lithiation of the selected cyclic OPS **II** at the (U)M06-2X-D3/cc-pVTZ level.

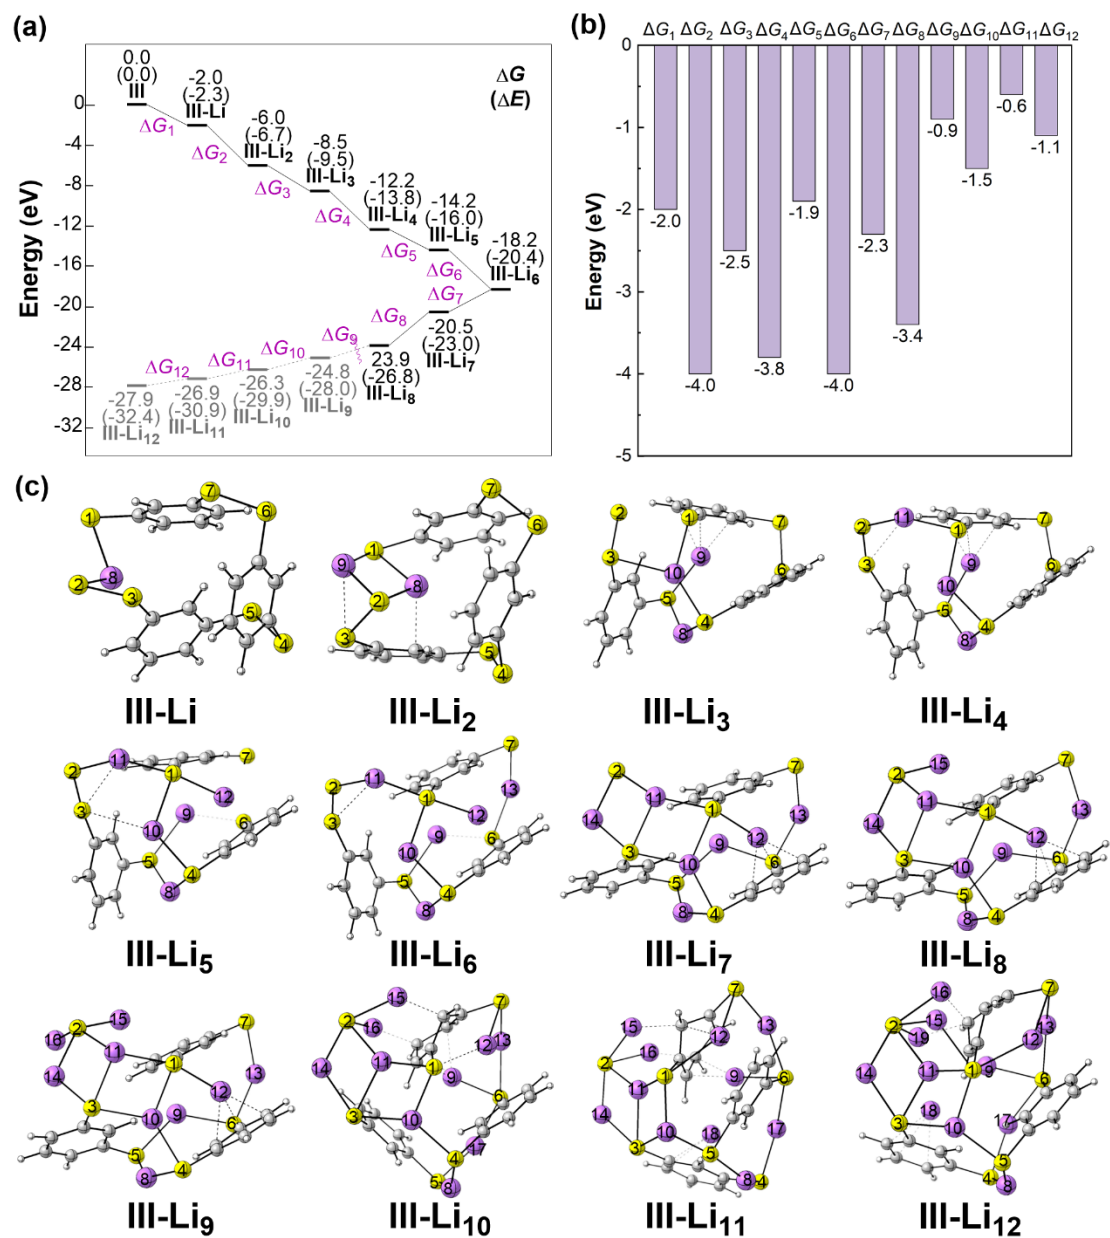

**Fig. S12** Relative Gibbs free energies ( $\Delta G$ , in eV) and the geometric structures involving the lithiation of the selected cyclic OPS **III** at the (U)M06-2X-D3/cc-pVTZ level.

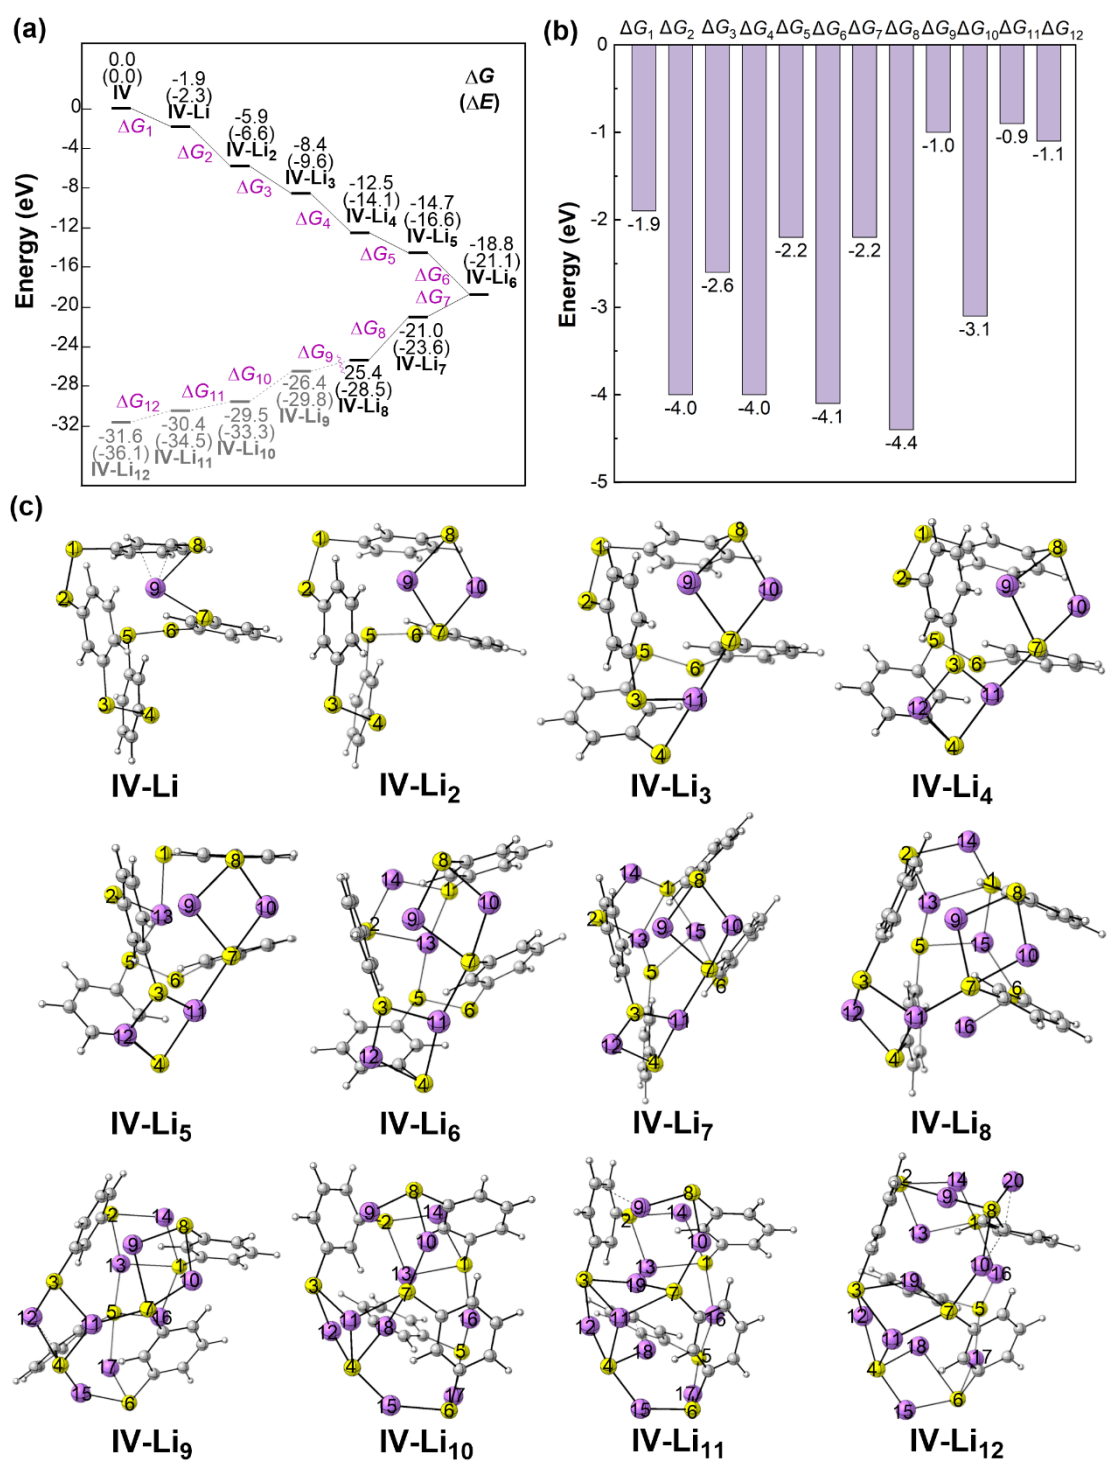

**Fig. S13** Relative Gibbs free energies ( $\Delta G$ , in eV) and the geometric structures involving the lithiation of the selected cyclic OPS **IV** at the (U)M06-2X-D3/cc-pVTZ level.

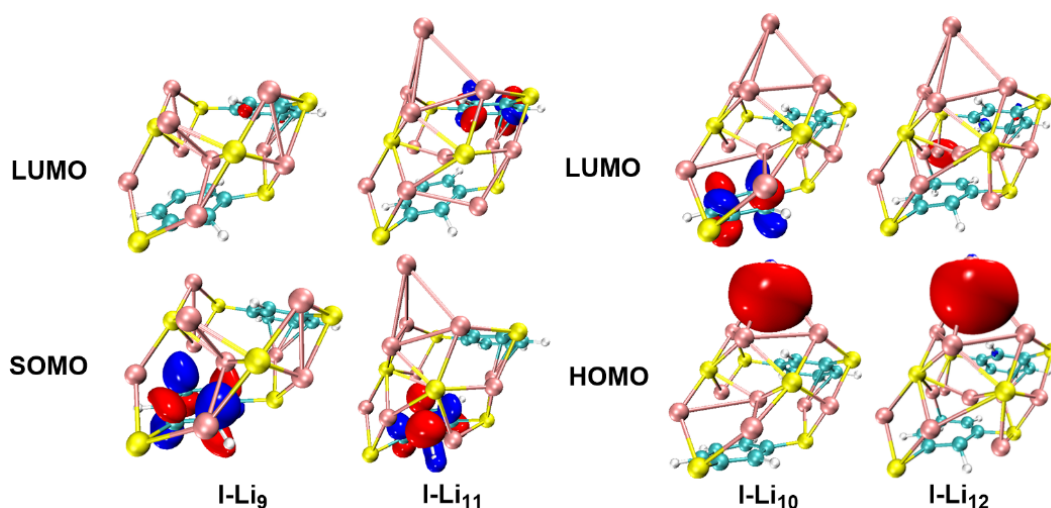

Fig. S14 Key molecular orbitals of the selected LiPSs (I-Li<sub>9</sub>~I-Li<sub>12</sub>).

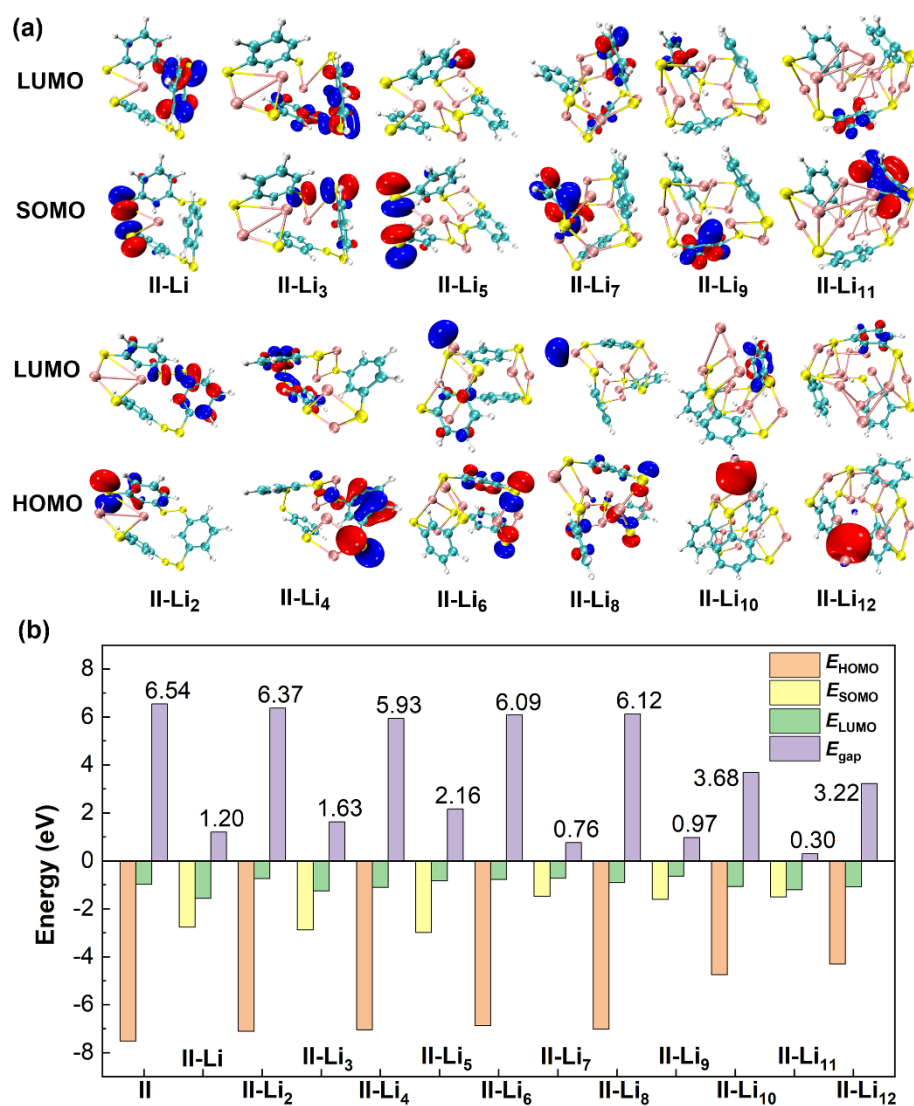

Fig. S15 Key molecular orbitals and their energy levels (in eV) of the LiPSs (II-Li<sub>n</sub>).

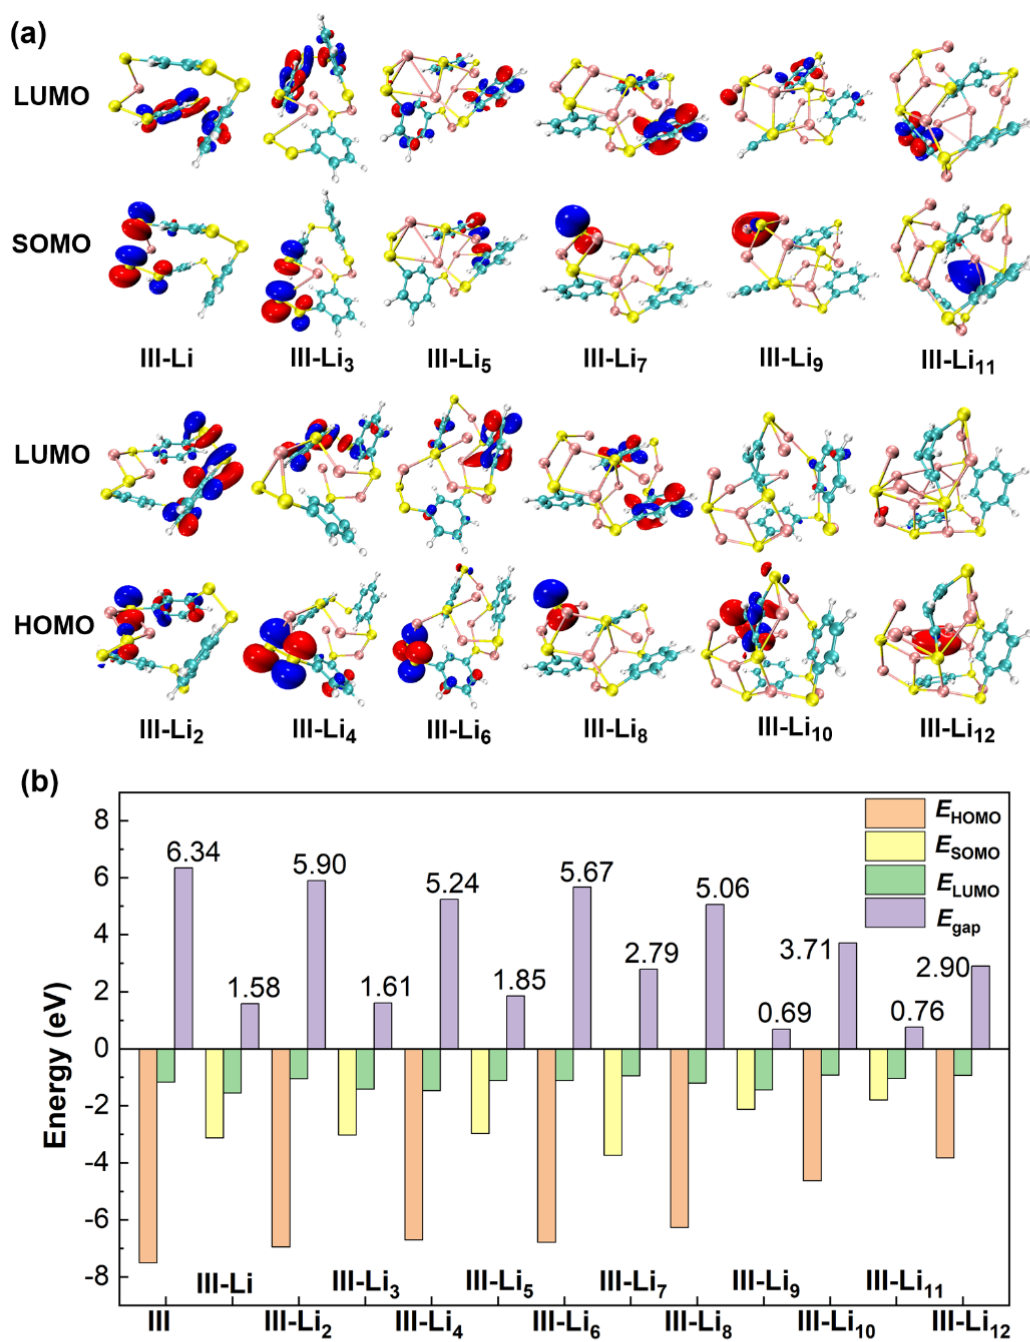

Fig. S16 Key molecular orbitals and their energy levels (in eV) of the LiPSs (III-Li<sub>n</sub>).

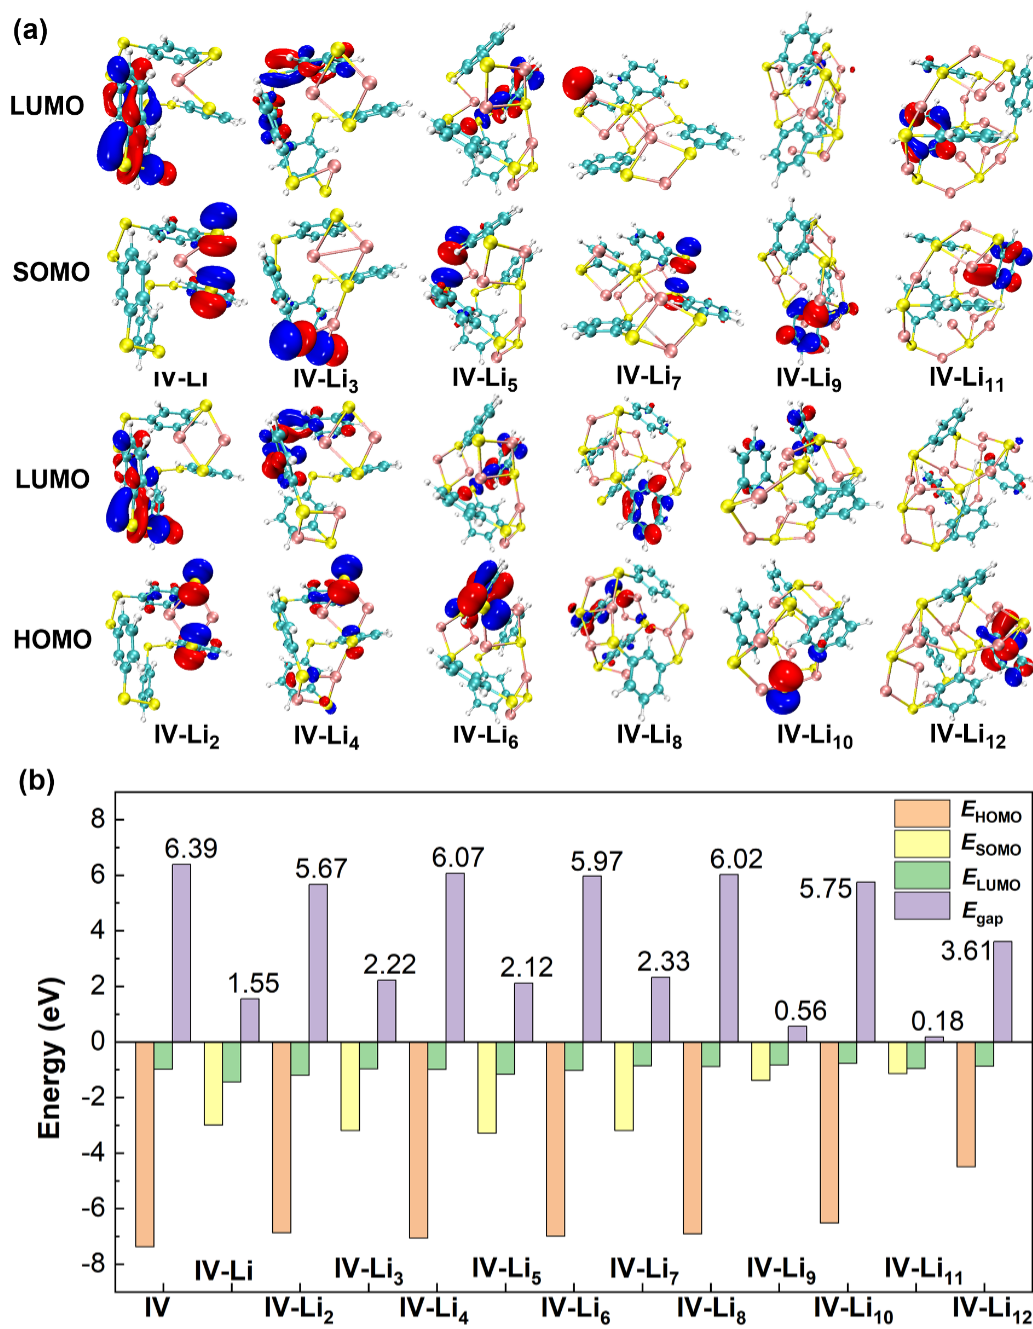

Fig. S17 Key molecular orbitals and their energy levels (in eV) of the LiPSs (IV-Li<sub>n</sub>).

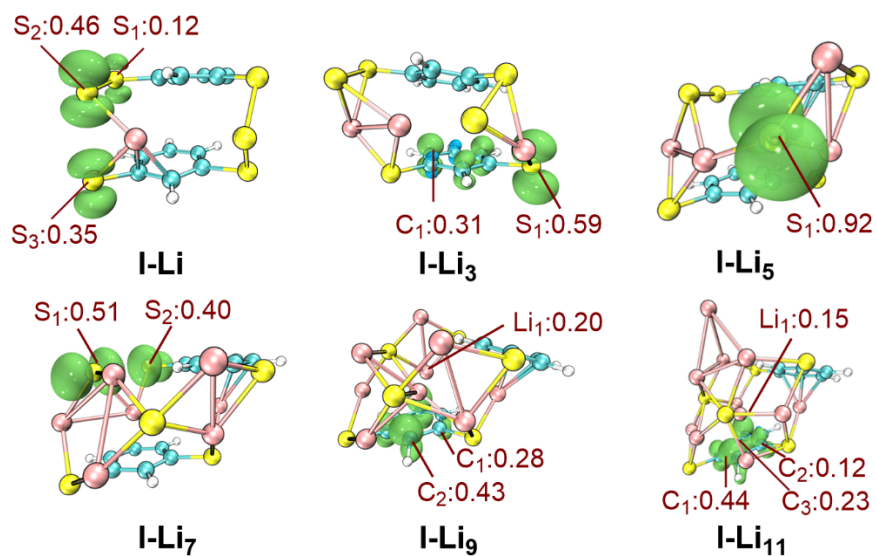

**Fig. S18** The spin densities of LiPSs (**I-Li<sub>n</sub>**) at the UM06-2X-D3/cc-pVTZ level.

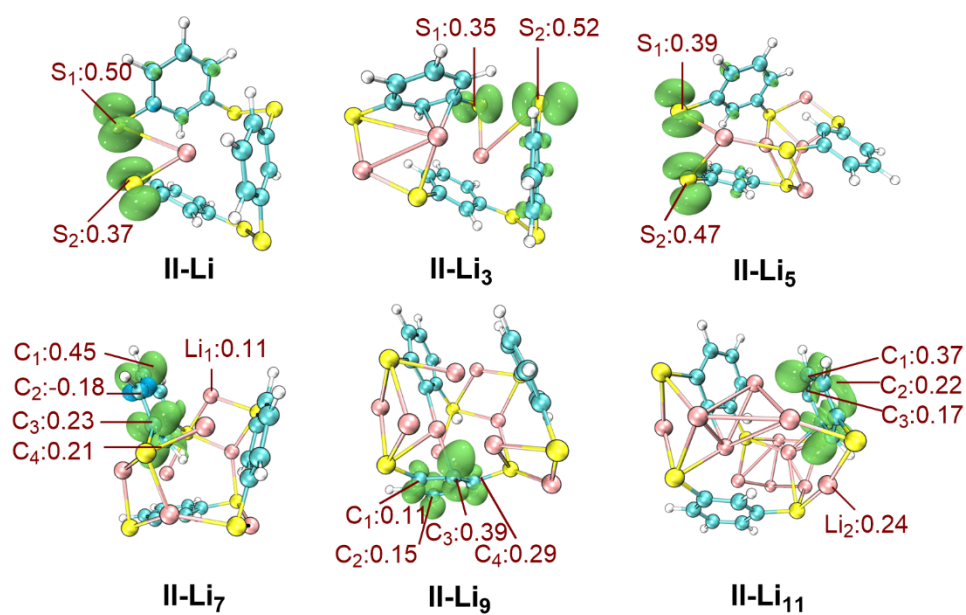

**Fig. S19** The spin densities of LiPSs (**II-Li<sub>n</sub>**) at the UM06-2X-D3/cc-pVTZ level.

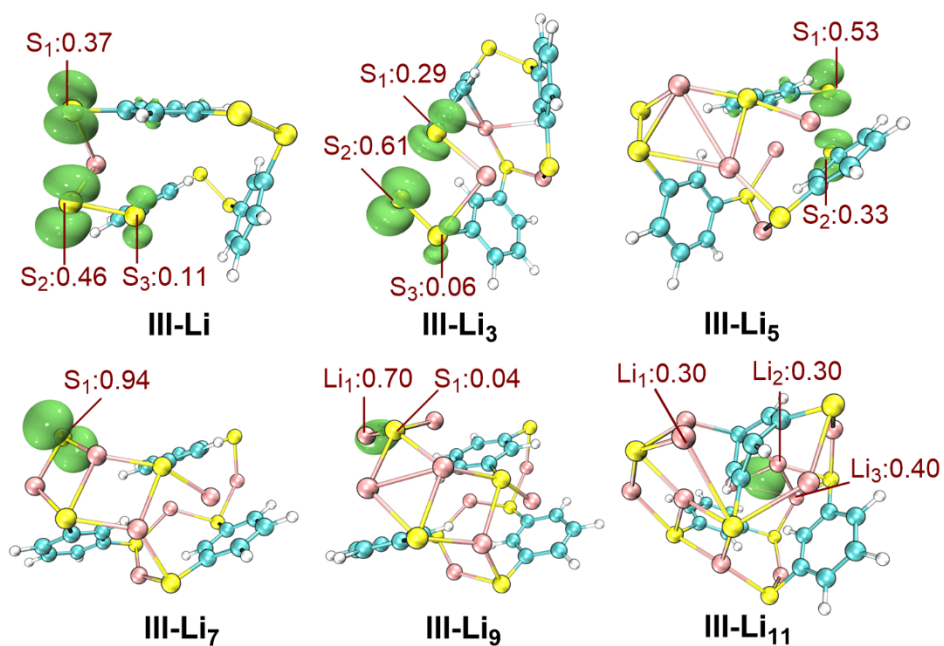

**Fig. S20** The spin densities of LiPSs (III-Li<sub>n</sub>) at the UM06-2X-D3/cc-pVTZ level.

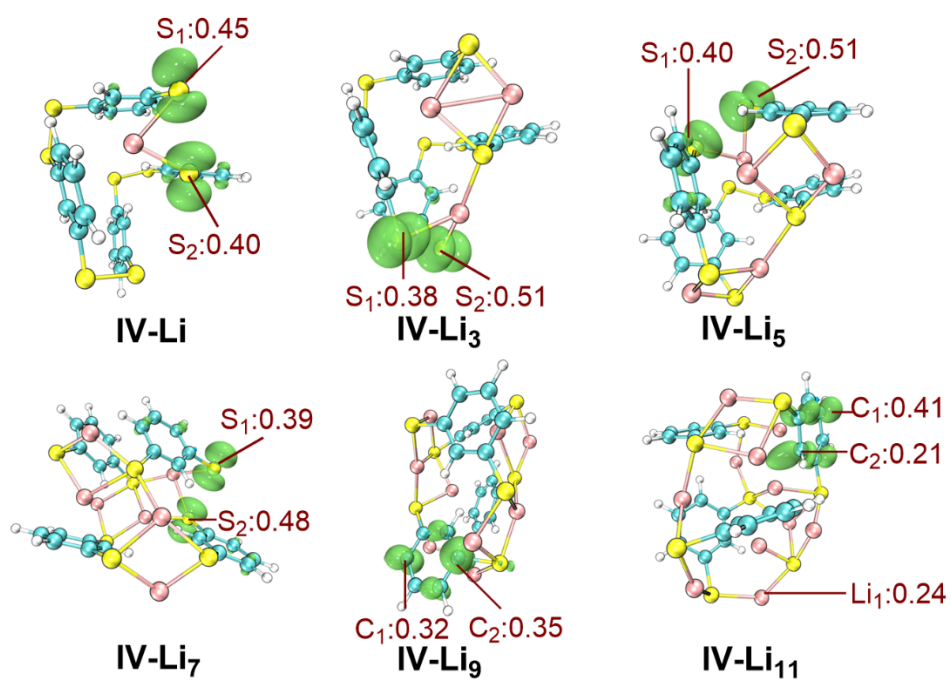

**Fig. S21** The spin densities of LiPSs (IV-Li<sub>n</sub>) at the UM06-2X-D3/cc-pVTZ level.



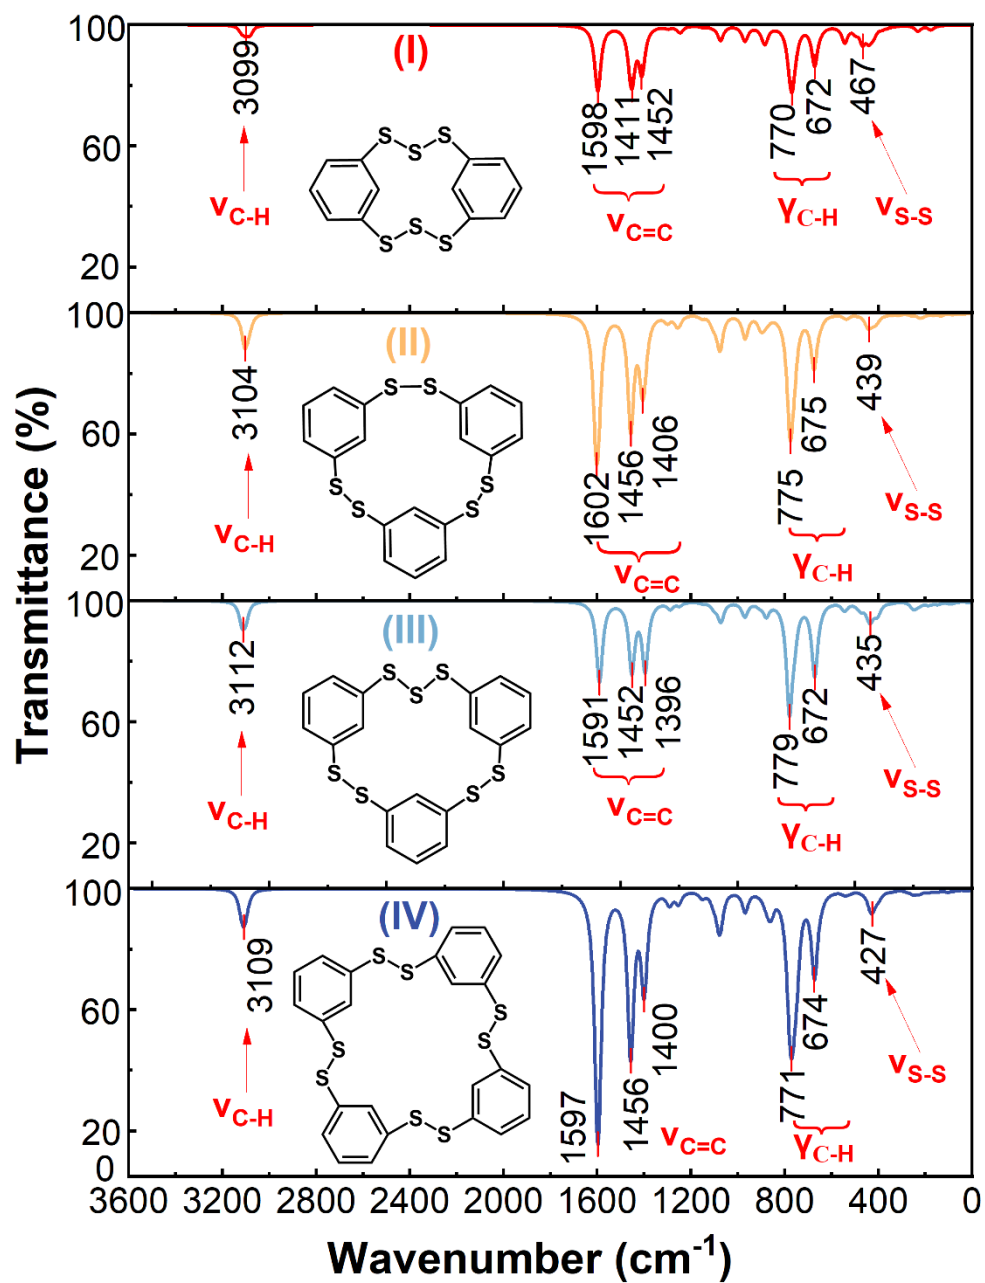

Fig. S22 Simulated infrared spectra for the cyclic OPSs (I~IV).

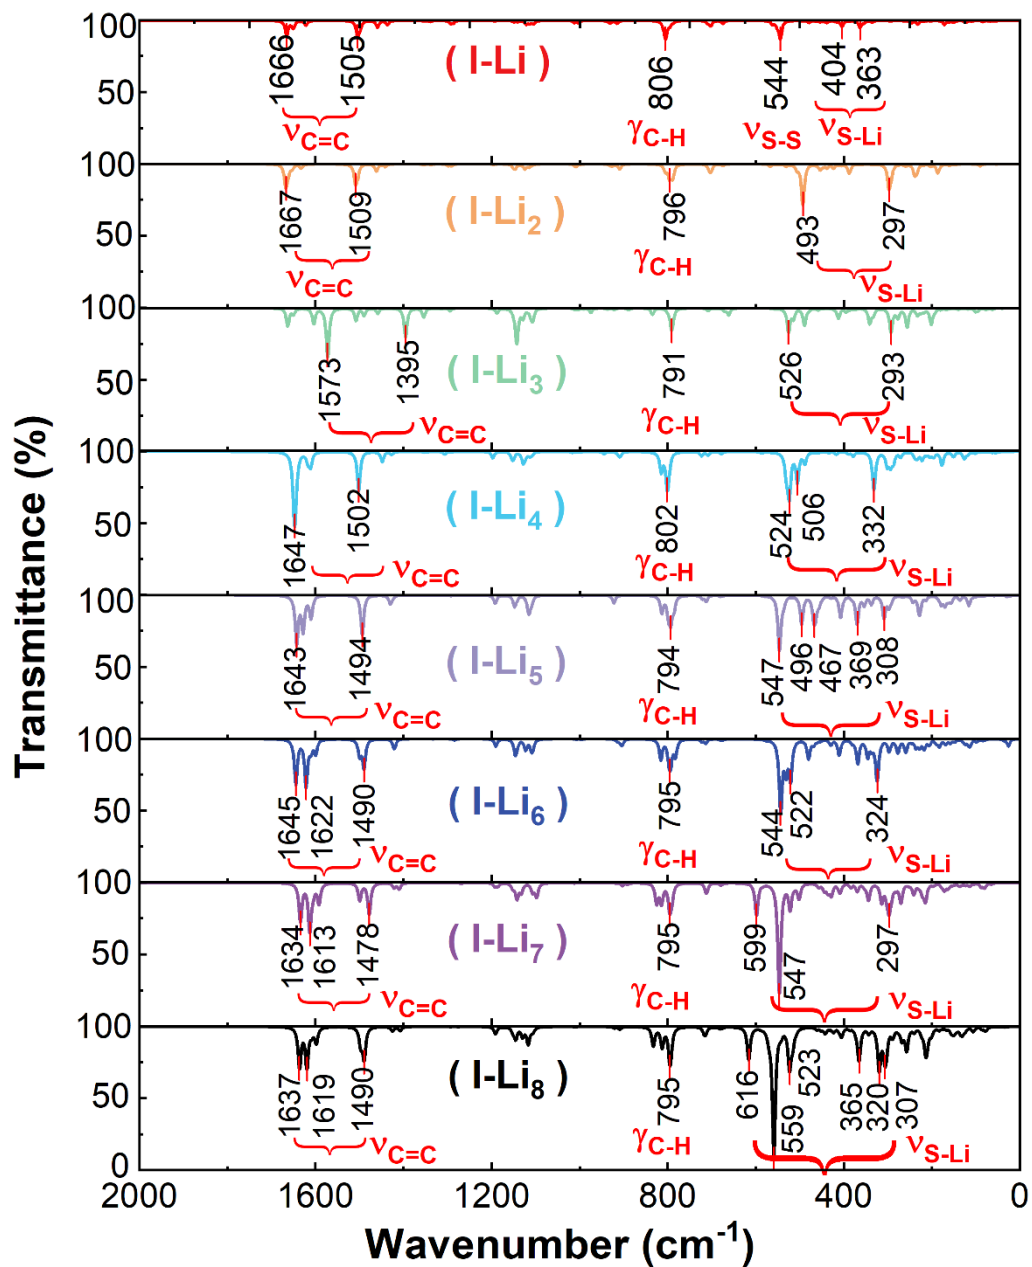

Fig. S23 Simulated infrared spectra for the LiPSs (I-Li<sub>n</sub>).

**Table S1** Key NPA atomic charges of LiPSs (**I-Li~I-Li<sub>12</sub>**) at the (U)M06-2X-D3/cc-pVTZ level. The atomic sequence numbers correspond to Fig. S10.

| <b>I-Li</b>             |            |               | <b>I-Li<sub>2</sub></b>  |            |               | <b>I-Li<sub>3</sub></b>  |            |               | <b>I-Li<sub>4</sub></b>  |            |               |
|-------------------------|------------|---------------|--------------------------|------------|---------------|--------------------------|------------|---------------|--------------------------|------------|---------------|
| <b>N</b>                | <b>Ato</b> | <b>Charge</b> | <b>N</b>                 | <b>Ato</b> | <b>Charge</b> | <b>N</b>                 | <b>Ato</b> | <b>Charge</b> | <b>N</b>                 | <b>Ato</b> | <b>Charge</b> |
| <b>o</b>                | <b>m</b>   |               | <b>o</b>                 | <b>m</b>   |               | <b>o</b>                 | <b>m</b>   |               | <b>o</b>                 | <b>m</b>   |               |
| 1                       | S          | 0.17629       | 1                        | S          | 0.06987       | 1                        | S          | 0.03166       | 1                        | S          | 0.17694       |
| 2                       | S          | 0.05367       | 2                        | S          | -0.72419      | 2                        | S          | -0.35379      | 2                        | S          | -0.72219      |
| 3                       | S          | 0.06456       | 3                        | S          | -0.56049      | 3                        | S          | -0.27047      | 3                        | S          | -0.52382      |
| 4                       | S          | 0.07577       | 4                        | S          | 0.15074       | 4                        | S          | 0.04315       | 4                        | S          | 0.10198       |
| 5                       | S          | -0.02262      | 5                        | S          | -0.03410      | 5                        | S          | -0.35258      | 5                        | S          | -0.71526      |
| 6                       | S          | 0.07786       | 6                        | S          | 0.14140       | 6                        | S          | 0.29218       | 6                        | S          | -0.55413      |
| 7                       | Li         | 0.42192       | 7                        | Li         | 0.84917       | 7                        | Li         | 0.42097       | 7                        | Li         | 0.85424       |
|                         |            |               | 8                        | Li         | 0.84520       | 8                        | Li         | 0.39975       | 8                        | Li         | 0.81472       |
|                         |            |               |                          |            |               | 9                        | Li         | 0.41378       | 9                        | Li         | 0.84586       |
|                         |            |               |                          |            |               |                          |            |               | 10                       | Li         | 0.87810       |
| <b>I-Li<sub>5</sub></b> |            |               | <b>I-Li<sub>6</sub></b>  |            |               | <b>I-Li<sub>7</sub></b>  |            |               | <b>I-Li<sub>8</sub></b>  |            |               |
| <b>N</b>                | <b>Ato</b> | <b>Charge</b> | <b>N</b>                 | <b>Ato</b> | <b>Charge</b> | <b>N</b>                 | <b>Ato</b> | <b>Charge</b> | <b>N</b>                 | <b>Ato</b> | <b>Charge</b> |
| <b>o</b>                | <b>m</b>   |               | <b>o</b>                 | <b>m</b>   |               | <b>o</b>                 | <b>m</b>   |               | <b>o</b>                 | <b>m</b>   |               |
| 1                       | S          | 0.07314       | 1                        | S          | 0.16734       | 1                        | S          | 0.14384       | 1                        | S          | -0.55173      |
| 2                       | S          | -0.34443      | 2                        | S          | -0.71925      | 2                        | S          | -0.31218      | 2                        | S          | -1.67804      |
| 3                       | S          | -0.26530      | 3                        | S          | -0.56799      | 3                        | S          | -0.28363      | 3                        | S          | -0.56775      |
| 4                       | S          | -0.27394      | 4                        | S          | -0.51298      | 4                        | S          | -0.27010      | 4                        | S          | -0.54393      |
| 5                       | S          | 0.06517       | 5                        | S          | -1.68274      | 5                        | S          | -0.84008      | 5                        | S          | -1.68194      |
| 6                       | S          | -0.27205      | 6                        | S          | -0.52384      | 6                        | S          | -0.25851      | 6                        | S          | -0.53313      |
| 7                       | Li         | 0.43047       | 7                        | Li         | 0.85946       | 7                        | Li         | 0.43098       | 7                        | Li         | 0.85593       |
| 8                       | Li         | 0.39736       | 8                        | Li         | 0.87746       | 8                        | Li         | 0.42667       | 8                        | Li         | 0.84518       |
| 9                       | Li         | 0.39573       | 9                        | Li         | 0.76070       | 9                        | Li         | 0.40815       | 9                        | Li         | 0.81140       |
| 10                      | Li         | 0.43342       | 10                       | Li         | 0.86326       | 10                       | Li         | 0.42955       | 10                       | Li         | 0.85722       |
| 11                      | Li         | 0.43625       | 11                       | Li         | 0.86768       | 11                       | Li         | 0.43317       | 11                       | Li         | 0.86281       |
|                         |            |               | 12                       | Li         | 0.80873       | 12                       | Li         | 0.39349       | 12                       | Li         | 0.79213       |
|                         |            |               |                          |            |               | 13                       | Li         | 0.39469       | 13                       | Li         | 0.80070       |
|                         |            |               |                          |            |               |                          |            |               | 14                       | Li         | 0.87678       |
| <b>I-Li<sub>9</sub></b> |            |               | <b>I-Li<sub>10</sub></b> |            |               | <b>I-Li<sub>11</sub></b> |            |               | <b>I-Li<sub>12</sub></b> |            |               |
| <b>N</b>                | <b>Ato</b> | <b>Charge</b> | <b>N</b>                 | <b>Ato</b> | <b>Charge</b> | <b>N</b>                 | <b>Ato</b> | <b>Charge</b> | <b>N</b>                 | <b>Ato</b> | <b>Charge</b> |
| <b>o</b>                | <b>m</b>   |               | <b>o</b>                 | <b>m</b>   |               | <b>o</b>                 | <b>m</b>   |               | <b>o</b>                 | <b>m</b>   |               |
| 1                       | S          | -0.27469      | 1                        | S          | -0.55947      | 1                        | S          | -0.27003      | 1                        | S          | -0.56740      |
| 2                       | S          | -0.84369      | 2                        | S          | -1.70147      | 2                        | S          | -0.84370      | 2                        | S          | -1.65434      |
| 3                       | S          | -0.28181      | 3                        | S          | -0.55169      | 3                        | S          | -0.25428      | 3                        | S          | -0.56705      |
| 4                       | S          | -0.27709      | 4                        | S          | -0.53530      | 4                        | S          | -0.26742      | 4                        | S          | -0.51510      |
| 5                       | S          | -0.82829      | 5                        | S          | -1.69809      | 5                        | S          | -0.82172      | 5                        | S          | -1.65150      |
| 6                       | S          | -0.28966      | 6                        | S          | -0.51246      | 6                        | S          | -0.29211      | 6                        | S          | -0.60968      |
| 7                       | Li         | 0.43060       | 7                        | Li         | 0.86947       | 7                        | Li         | 0.43637       | 7                        | Li         | 0.86805       |
| 8                       | Li         | 0.42237       | 8                        | Li         | 0.86259       | 8                        | Li         | 0.40796       | 8                        | Li         | 0.80950       |

|    |    |         |    |    |          |    |    |          |    |    |          |
|----|----|---------|----|----|----------|----|----|----------|----|----|----------|
| 9  | Li | 0.43630 | 9  | Li | 0.61045  | 9  | Li | 0.28057  | 9  | Li | 0.63144  |
| 10 | Li | 0.43332 | 10 | Li | 0.85968  | 10 | Li | 0.43432  | 10 | Li | 0.85239  |
| 11 | Li | 0.42852 | 11 | Li | 0.67400  | 11 | Li | 0.33030  | 11 | Li | 0.67116  |
| 12 | Li | 0.40865 | 12 | Li | 0.81758  | 12 | Li | 0.39889  | 12 | Li | 0.80013  |
| 13 | Li | 0.41509 | 13 | Li | 0.83782  | 13 | Li | 0.41421  | 13 | Li | 0.76667  |
| 14 | Li | 0.43713 | 14 | Li | 0.67763  | 14 | Li | 0.35497  | 14 | Li | 0.67344  |
| 15 | Li | 0.39391 | 15 | Li | 0.78064  | 15 | Li | 0.39611  | 15 | Li | 0.76201  |
|    |    |         | 16 | Li | -0.21757 | 16 | Li | -0.08379 | 16 | Li | -0.20804 |
|    |    |         |    |    |          | 17 | Li | 0.43165  | 17 | Li | 0.85638  |
|    |    |         |    |    |          |    |    |          | 18 | Li | 0.86327  |

**Table S2** Key NPA atomic charges of LiPSs (**II-Li-III-Li<sub>12</sub>**) at the (U)M06-2X-D3/cc-pVTZ level. The atomic sequence numbers correspond to Fig. S11.

| II-Li              |      |          | II-Li <sub>2</sub> |      |          | II-Li <sub>3</sub> |      |          | II-Li <sub>4</sub> |      |          |
|--------------------|------|----------|--------------------|------|----------|--------------------|------|----------|--------------------|------|----------|
| N                  | Atom | Charge   |
| 1                  | S    | 0.22830  | 1                  | S    | -0.49345 | 1                  | S    | -0.26345 | 1                  | S    | 0.12686  |
| 2                  | S    | 0.07078  | 2                  | S    | -0.58202 | 2                  | S    | -0.27862 | 2                  | S    | 0.13498  |
| 3                  | S    | 0.08268  | 3                  | S    | 0.15928  | 3                  | S    | 0.08667  | 3                  | S    | -0.58721 |
| 4                  | S    | 0.07865  | 4                  | S    | 0.16099  | 4                  | S    | 0.07945  | 4                  | S    | -0.54149 |
| 5                  | S    | 0.06597  | 5                  | S    | 0.15461  | 5                  | S    | 0.24229  | 5                  | S    | -0.57190 |
| 6                  | S    | 0.07892  | 6                  | S    | 0.17560  | 6                  | S    | 0.05423  | 6                  | S    | -0.59224 |
| 7                  | Li   | 0.43911  | 7                  | Li   | 0.88636  | 7                  | Li   | 0.43760  | 7                  | Li   | 0.86110  |
|                    |      |          | 8                  | Li   | 0.83625  | 8                  | Li   | 0.42175  | 8                  | Li   | 0.80511  |
|                    |      |          |                    |      |          | 9                  | Li   | 0.43711  | 9                  | Li   | 0.85297  |
|                    |      |          |                    |      |          |                    |      |          | 10                 | Li   | 0.81718  |
| II-Li <sub>5</sub> |      |          | II-Li <sub>6</sub> |      |          | II-Li <sub>7</sub> |      |          | II-Li <sub>8</sub> |      |          |
| N                  | Atom | Charge   |
|                    | H    | 0.10833  |                    | H    | 0.19751  | 1                  | S    | -0.30232 | 1                  | S    | -0.58675 |
| 1                  | S    | 0.11577  | 1                  | S    | -0.62401 | 2                  | S    | -0.26241 | 2                  | S    | -0.54951 |
| 2                  | S    | 0.14959  | 2                  | S    | -0.53741 | 3                  | S    | -0.28553 | 3                  | S    | -0.63003 |
| 3                  | S    | -0.29827 | 3                  | S    | -0.60222 | 4                  | S    | -0.28480 | 4                  | S    | -0.54902 |
| 4                  | S    | -0.30242 | 4                  | S    | -0.61394 | 5                  | S    | -0.27849 | 5                  | S    | -0.54578 |
| 5                  | S    | -0.28605 | 5                  | S    | -0.56831 | 6                  | S    | -0.30567 | 6                  | S    | -0.60261 |
| 6                  | S    | -0.29470 | 6                  | S    | -0.54049 | 7                  | Li   | 0.42876  | 7                  | Li   | 0.87769  |
| 7                  | Li   | 0.43594  | 7                  | Li   | 0.86850  | 8                  | Li   | 0.45477  | 8                  | Li   | 0.83253  |
| 8                  | Li   | 0.43343  | 8                  | Li   | 0.80603  | 9                  | Li   | 0.43808  | 9                  | Li   | 0.84078  |
| 9                  | Li   | 0.42572  | 9                  | Li   | 0.84503  | 10                 | Li   | 0.40044  | 10                 | Li   | 0.81788  |
| 10                 | Li   | 0.40715  | 10                 | Li   | 0.80331  | 11                 | Li   | 0.40247  | 11                 | Li   | 0.82400  |
| 11                 | Li   | 0.39633  | 11                 | Li   | 0.82589  | 12                 | Li   | 0.44226  | 12                 | Li   | 0.85331  |
|                    |      |          | 12                 | Li   | 0.87100  | 13                 | Li   | 0.44136  | 13                 | Li   | 0.78858  |

| II-Li <sub>9</sub> |          |          | II-Li <sub>10</sub> |          |          | II-Li <sub>11</sub> |          |          | II-Li <sub>12</sub> |          |          |
|--------------------|----------|----------|---------------------|----------|----------|---------------------|----------|----------|---------------------|----------|----------|
| N<br>o             | Ato<br>m | Charge   | N<br>o              | Ato<br>m | Charge   | N<br>o              | Ato<br>m | Charge   | N<br>o              | Ato<br>m | Charge   |
| 1                  | S        | -0.30005 | 1                   | S        | -0.56962 | 1                   | S        | -0.28057 | 1                   | S        | -0.58001 |
| 2                  | S        | -0.29488 | 2                   | S        | -0.51844 | 2                   | S        | -0.26872 | 2                   | S        | -0.52794 |
| 3                  | S        | -0.32273 | 3                   | S        | -0.61298 | 3                   | S        | -0.29347 | 3                   | S        | -0.62322 |
| 4                  | S        | -0.27311 | 4                   | S        | -0.55818 | 4                   | S        | -0.28008 | 4                   | S        | -0.55715 |
| 5                  | S        | -0.28237 | 5                   | S        | -0.60280 | 5                   | S        | -0.32815 | 5                   | S        | -0.61454 |
| 6                  | S        | -0.31650 | 6                   | S        | -0.68706 | 6                   | S        | -0.38064 | 6                   | S        | -0.75063 |
| 7                  | Li       | 0.43497  | 7                   | Li       | 0.87343  | 7                   | Li       | 0.42289  | 7                   | Li       | 0.85936  |
| 8                  | Li       | 0.42019  | 8                   | Li       | 0.85560  | 8                   | Li       | 0.43838  | 8                   | Li       | 0.61563  |
| 9                  | Li       | 0.42825  | 9                   | Li       | 0.72147  | 9                   | Li       | 0.35798  | 9                   | Li       | 0.73016  |
| 10                 | Li       | 0.40981  | 10                  | Li       | 0.62225  | 10                  | Li       | 0.33446  | 10                  | Li       | 0.62527  |
| 11                 | Li       | 0.42827  | 11                  | Li       | 0.83413  | 11                  | Li       | 0.40610  | 11                  | Li       | 0.63644  |
| 12                 | Li       | 0.43463  | 12                  | Li       | 0.84691  | 12                  | Li       | 0.42373  | 12                  | Li       | 0.84169  |
| 13                 | Li       | 0.43682  | 13                  | Li       | 0.52312  | 13                  | Li       | 0.31180  | 13                  | Li       | 0.61577  |
| 14                 | Li       | 0.39127  | 14                  | Li       | 0.75273  | 14                  | Li       | 0.42049  | 14                  | Li       | 0.43624  |
| 15                 | Li       | 0.36616  | 15                  | Li       | 0.76537  | 15                  | Li       | 0.38779  | 15                  | Li       | 0.76021  |
|                    |          |          | 16                  | Li       | -0.10408 | 16                  | Li       | -0.08373 | 16                  | Li       | -0.16160 |
|                    |          |          |                     |          |          | 17                  | Li       | 0.39762  | 17                  | Li       | 0.78024  |
|                    |          |          |                     |          |          |                     |          |          | 18                  | Li       | 0.05151  |

**Table S3** Key NPA atomic charges of LiPSs (**III-Li~III-Li<sub>12</sub>**) at the (U)M06-2X-D3/cc-pVTZ level. The atomic sequence numbers correspond to Fig. S12.

| III-Li <sub>1</sub> |          |         | III-Li <sub>2</sub> |          |          | III-Li <sub>3</sub> |          |          | III-Li <sub>4</sub> |          |          |
|---------------------|----------|---------|---------------------|----------|----------|---------------------|----------|----------|---------------------|----------|----------|
| N<br>o              | Ato<br>m | Charge  | N<br>o              | Ato<br>m | Charge   | N<br>o              | Ato<br>m | Charge   | N<br>o              | Ato<br>m | Charge   |
| 1                   | S        | 0.06584 | 1                   | S        | -0.55450 | 1                   | S        | 0.01512  | 1                   | S        | -0.54482 |
| 2                   | S        | 0.05875 | 2                   | S        | -0.73369 | 2                   | S        | 0.20428  | 2                   | S        | -0.68850 |
| 3                   | S        | 0.15520 | 3                   | S        | 0.07579  | 3                   | S        | 0.10730  | 3                   | S        | 0.06801  |
| 4                   | S        | 0.07261 | 4                   | S        | 0.15083  | 4                   | S        | -0.29036 | 4                   | S        | -0.58243 |
| 5                   | S        | 0.06167 | 5                   | S        | 0.15296  | 5                   | S        | -0.27711 | 5                   | S        | -0.55868 |
| 6                   | S        | 0.06871 | 6                   | S        | 0.12920  | 6                   | S        | 0.06834  | 6                   | S        | 0.13688  |
| 7                   | S        | 0.07979 | 7                   | S        | 0.14007  | 7                   | S        | 0.06950  | 7                   | S        | 0.13751  |
| 8                   | Li       | 0.42990 | 8                   | Li       | 0.83480  | 8                   | Li       | 0.42482  | 8                   | Li       | 0.83783  |
|                     |          |         |                     |          |          | 9                   | Li       | 0.42381  | 9                   | Li       | 0.85514  |
|                     |          |         |                     |          |          | 10                  | Li       | 0.41045  | 10                  | Li       | 0.83211  |
|                     |          |         |                     |          |          |                     |          |          | 11                  | Li       | 0.83811  |
| III-Li <sub>5</sub> |          |         | III-Li <sub>6</sub> |          |          | III-Li <sub>7</sub> |          |          | III-Li <sub>8</sub> |          |          |
| N<br>o              | Ato<br>m | Charge  | N<br>o              | Ato<br>m | Charge   | N<br>o              | Ato<br>m | Charge   | N<br>o              | Ato<br>m | Charge   |

| 1                   | S    | -0.31121 | 1                    | S    | -0.63107 | 1                    | S    | -0.30369 | 1                    | S    | -0.58699 |
|---------------------|------|----------|----------------------|------|----------|----------------------|------|----------|----------------------|------|----------|
| 2                   | S    | -0.34235 | 2                    | S    | -0.68580 | 2                    | S    | 0.10339  | 2                    | S    | -1.68780 |
| 3                   | S    | 0.02560  | 3                    | S    | 0.07413  | 3                    | S    | -0.28254 | 3                    | S    | -0.55277 |
| 4                   | S    | -0.27707 | 4                    | S    | -0.55231 | 4                    | S    | -0.26842 | 4                    | S    | -0.52895 |
| 5                   | S    | -0.26341 | 5                    | S    | -0.53068 | 5                    | S    | -0.26980 | 5                    | S    | -0.56329 |
| 6                   | S    | 0.06999  | 6                    | S    | -0.54582 | 6                    | S    | -0.26993 | 6                    | S    | -0.54263 |
| 7                   | S    | 0.25261  | 7                    | S    | -0.48050 | 7                    | S    | -0.25155 | 7                    | S    | -0.48900 |
| 8                   | Li   | 0.42669  | 8                    | Li   | 0.84563  | 8                    | Li   | 0.42900  | 8                    | Li   | 0.86129  |
| 9                   | Li   | 0.42287  | 9                    | Li   | 0.84011  | 9                    | Li   | 0.41525  | 9                    | Li   | 0.83088  |
| 10                  | Li   | 0.41191  | 10                   | Li   | 0.83609  | 10                   | Li   | 0.40037  | 10                   | Li   | 0.79690  |
| 11                  | Li   | 0.43005  | 11                   | Li   | 0.86321  | 11                   | Li   | 0.39198  | 11                   | Li   | 0.79240  |
| 12                  | Li   | 0.43443  | 12                   | Li   | 0.87872  | 12                   | Li   | 0.43629  | 12                   | Li   | 0.87548  |
|                     |      |          | 13                   | Li   | 0.83994  | 13                   | Li   | 0.41733  | 13                   | Li   | 0.83744  |
|                     |      |          |                      |      |          | 14                   | Li   | 0.42215  | 14                   | Li   | 0.87577  |
|                     |      |          |                      |      |          |                      |      |          | 15                   | Li   | 0.91194  |
| III-Li <sub>9</sub> |      |          | III-Li <sub>10</sub> |      |          | III-Li <sub>11</sub> |      |          | III-Li <sub>12</sub> |      |          |
| No                  | Atom | Charge   | No                   | Atom | Charge   | No                   | Atom | Charge   | No                   | Atom | Charge   |
| 1                   | S    | -0.29800 | 1                    | S    | -0.57158 | 1                    | S    | -0.28923 | 1                    | S    | -0.59827 |
| 2                   | S    | -0.82734 | 2                    | S    | -1.63030 | 2                    | S    | -0.81474 | 2                    | S    | -1.65100 |
| 3                   | S    | -0.28598 | 3                    | S    | -0.56510 | 3                    | S    | -0.27176 | 3                    | S    | -0.57714 |
| 4                   | S    | -0.26819 | 4                    | S    | -0.57448 | 4                    | S    | -0.29676 | 4                    | S    | -0.59199 |
| 5                   | S    | -0.28103 | 5                    | S    | -0.61495 | 5                    | S    | -0.28634 | 5                    | S    | -0.59878 |
| 6                   | S    | -0.27255 | 6                    | S    | -0.63016 | 6                    | S    | -0.30201 | 6                    | S    | -0.61445 |
| 7                   | S    | -0.24600 | 7                    | S    | -0.56626 | 7                    | S    | -0.28189 | 7                    | S    | -0.56885 |
| 8                   | Li   | 0.43065  | 8                    | Li   | 0.84242  | 8                    | Li   | 0.42919  | 8                    | Li   | 0.85881  |
| 9                   | Li   | 0.41937  | 9                    | Li   | 0.82726  | 9                    | Li   | 0.42085  | 9                    | Li   | 0.35105  |
| 10                  | Li   | 0.40204  | 10                   | Li   | 0.80344  | 10                   | Li   | 0.40988  | 10                   | Li   | 0.81947  |
| 11                  | Li   | 0.40780  | 11                   | Li   | 0.74096  | 11                   | Li   | 0.36459  | 11                   | Li   | 0.71603  |
| 12                  | Li   | 0.44098  | 12                   | Li   | 0.86622  | 12                   | Li   | 0.43478  | 12                   | Li   | 0.87236  |
| 13                  | Li   | 0.42194  | 13                   | Li   | 0.83949  | 13                   | Li   | 0.41972  | 13                   | Li   | 0.83448  |
| 14                  | Li   | 0.43455  | 14                   | Li   | 0.87567  | 14                   | Li   | 0.43984  | 14                   | Li   | 0.89346  |
| 15                  | Li   | 0.45465  | 15                   | Li   | 0.84248  | 15                   | Li   | 0.42558  | 15                   | Li   | 0.85775  |
| 16                  | Li   | 0.44784  | 16                   | Li   | 0.80867  | 16                   | Li   | 0.40209  | 16                   | Li   | 0.83270  |
|                     |      |          | 17                   | Li   | 0.85908  | 17                   | Li   | 0.43714  | 17                   | Li   | 0.80789  |
|                     |      |          |                      |      |          | 18                   | Li   | 0.46027  | 18                   | Li   | -0.04556 |
|                     |      |          |                      |      |          |                      |      |          | 19                   | Li   | 0.70765  |

**Table S4** Key NPA atomic charges of LiPSs (IV-Li~IV-Li<sub>12</sub>) at the (U)M06-2X-D3/cc-pVTZ level. The atomic sequence numbers correspond to Fig. S13.

| IV-Li |      |        | IV-Li <sub>2</sub> |      |        | IV-Li <sub>3</sub> |      |        | IV-Li <sub>4</sub> |      |        |
|-------|------|--------|--------------------|------|--------|--------------------|------|--------|--------------------|------|--------|
| No    | Atom | Charge | No                 | Atom | Charge | No                 | Atom | Charge | No                 | Atom | Charge |

| 1                  | S    | 0.06877  | 1                   | S    | 0.13471  | 1                   | S    | 0.06548  | 1                   | S    | 0.12987  |
|--------------------|------|----------|---------------------|------|----------|---------------------|------|----------|---------------------|------|----------|
| 2                  | S    | 0.08595  | 2                   | S    | 0.16929  | 2                   | S    | 0.08018  | 2                   | S    | 0.14856  |
| 3                  | S    | 0.06316  | 3                   | S    | 0.12289  | 3                   | S    | 0.08471  | 3                   | S    | -0.55218 |
| 4                  | S    | 0.07400  | 4                   | S    | 0.14550  | 4                   | S    | 0.19550  | 4                   | S    | -0.53294 |
| 5                  | S    | 0.06239  | 5                   | S    | 0.12963  | 5                   | S    | 0.07924  | 5                   | S    | 0.16830  |
| 6                  | S    | 0.07167  | 6                   | S    | 0.14859  | 6                   | S    | 0.08323  | 6                   | S    | 0.16756  |
| 7                  | S    | 0.13970  | 7                   | S    | -0.57161 | 7                   | S    | -0.30540 | 7                   | S    | -0.60548 |
| 8                  | S    | 0.10984  | 8                   | S    | -0.55443 | 8                   | S    | -0.28475 | 8                   | S    | -0.58153 |
| 9                  | Li   | 0.41191  | 9                   | Li   | 0.83372  | 9                   | Li   | 0.42379  | 9                   | Li   | 0.85457  |
|                    |      |          | 10                  | Li   | 0.86469  | 10                  | Li   | 0.43202  | 10                  | Li   | 0.86123  |
|                    |      |          |                     |      |          | 11                  | Li   | 0.40321  | 11                  | Li   | 0.80850  |
|                    |      |          |                     |      |          |                     |      |          | 12                  | Li   | 0.83897  |
| IV-Li <sub>5</sub> |      |          | IV-Li <sub>6</sub>  |      |          | IV-Li <sub>7</sub>  |      |          | IV-Li <sub>8</sub>  |      |          |
| No                 | Atom | Charge   | No                  | Atom | Charge   | No                  | Atom | Charge   | No                  | Atom | Charge   |
| 1                  | S    | 0.18939  | 1                   | S    | -0.58464 | 1                   | S    | -0.30867 | 1                   | S    | -0.61441 |
| 2                  | S    | 0.09604  | 2                   | S    | -0.58854 | 2                   | S    | -0.28503 | 2                   | S    | -0.57922 |
| 3                  | S    | -0.28354 | 3                   | S    | -0.56353 | 3                   | S    | -0.28284 | 3                   | S    | -0.58516 |
| 4                  | S    | -0.26507 | 4                   | S    | -0.53207 | 4                   | S    | -0.31337 | 4                   | S    | -0.54601 |
| 5                  | S    | 0.06587  | 5                   | S    | 0.12999  | 5                   | S    | 0.04594  | 5                   | S    | -0.51945 |
| 6                  | S    | 0.08861  | 6                   | S    | 0.17564  | 6                   | S    | 0.17476  | 6                   | S    | -0.56353 |
| 7                  | S    | -0.29719 | 7                   | S    | -0.59448 | 7                   | S    | -0.31510 | 7                   | S    | -0.61606 |
| 8                  | S    | -0.27012 | 8                   | S    | -0.55456 | 8                   | S    | -0.28862 | 8                   | S    | -0.54109 |
| 9                  | Li   | 0.41579  | 9                   | Li   | 0.82000  | 9                   | Li   | 0.40311  | 9                   | Li   | 0.82128  |
| 10                 | Li   | 0.43063  | 10                  | Li   | 0.86780  | 10                  | Li   | 0.43154  | 10                  | Li   | 0.87039  |
| 11                 | Li   | 0.40515  | 11                  | Li   | 0.81220  | 11                  | Li   | 0.39803  | 11                  | Li   | 0.79179  |
| 12                 | Li   | 0.41642  | 12                  | Li   | 0.83113  | 12                  | Li   | 0.42953  | 12                  | Li   | 0.86349  |
| 13                 | Li   | 0.39949  | 13                  | Li   | 0.78621  | 13                  | Li   | 0.39473  | 13                  | Li   | 0.76129  |
|                    |      |          | 14                  | Li   | 0.86430  | 14                  | Li   | 0.43952  | 14                  | Li   | 0.87522  |
|                    |      |          |                     |      |          | 15                  | Li   | 0.41925  | 15                  | Li   | 0.79096  |
|                    |      |          |                     |      |          |                     |      |          | 16                  | Li   | 0.88688  |
| IV-Li <sub>9</sub> |      |          | IV-Li <sub>10</sub> |      |          | IV-Li <sub>11</sub> |      |          | IV-Li <sub>12</sub> |      |          |
| No                 | Atom | Charge   | No                  | Atom | Charge   | No                  | Atom | Charge   | No                  | Atom | Charge   |
| 1                  | S    | -0.28868 | 1                   | S    | -0.57704 | 1                   | S    | -0.30174 | 1                   | S    | -0.62203 |
| 2                  | S    | -0.28761 | 2                   | S    | -0.56042 | 2                   | S    | -0.30560 | 2                   | S    | -0.54123 |
| 3                  | S    | -0.28201 | 3                   | S    | -0.52597 | 3                   | S    | -0.30423 | 3                   | S    | -0.55726 |
| 4                  | S    | -0.31390 | 4                   | S    | -1.66507 | 4                   | S    | -0.81586 | 4                   | S    | -1.64368 |
| 5                  | S    | -0.31667 | 5                   | S    | -0.59464 | 5                   | S    | -0.29035 | 5                   | S    | -0.55572 |
| 6                  | S    | -0.26794 | 6                   | S    | -0.57685 | 6                   | S    | -0.28980 | 6                   | S    | -0.58435 |
| 7                  | S    | -0.30941 | 7                   | S    | -0.60481 | 7                   | S    | -0.29497 | 7                   | S    | -0.58967 |
| 8                  | S    | -0.27385 | 8                   | S    | -0.55123 | 8                   | S    | -0.26825 | 8                   | S    | -0.65600 |
| 9                  | Li   | 0.41430  | 9                   | Li   | 0.84670  | 9                   | Li   | 0.42355  | 9                   | Li   | 0.78266  |
| 10                 | Li   | 0.44081  | 10                  | Li   | 0.87613  | 10                  | Li   | 0.43473  | 10                  | Li   | 0.86932  |
| 11                 | Li   | 0.39958  | 11                  | Li   | 0.84495  | 11                  | Li   | 0.42220  | 11                  | Li   | 0.84022  |
| 12                 | Li   | 0.44536  | 12                  | Li   | 0.84139  | 12                  | Li   | 0.42199  | 12                  | Li   | 0.83299  |

|    |    |         |    |    |         |    |    |         |    |    |         |
|----|----|---------|----|----|---------|----|----|---------|----|----|---------|
| 13 | Li | 0.40138 | 13 | Li | 0.80871 | 13 | Li | 0.41869 | 13 | Li | 0.82526 |
| 14 | Li | 0.43786 | 14 | Li | 0.88502 | 14 | Li | 0.44380 | 14 | Li | 0.73559 |
| 15 | Li | 0.42641 | 15 | Li | 0.85733 | 15 | Li | 0.44011 | 15 | Li | 0.88850 |
| 16 | Li | 0.41672 | 16 | Li | 0.83958 | 16 | Li | 0.42453 | 16 | Li | 0.85296 |
| 17 | Li | 0.43188 | 17 | Li | 0.84381 | 17 | Li | 0.42845 | 17 | Li | 0.85239 |
|    |    |         | 18 | Li | 0.77214 | 18 | Li | 0.38914 | 18 | Li | 0.79399 |
|    |    |         |    |    |         | 19 | Li | 0.39694 | 19 | Li | 0.77512 |
|    |    |         |    |    |         |    |    |         | 20 | Li | 0.70694 |

---



**Table S5** The calculated absolute electronic energies ( $E$ , in a.u.), thermal free energies $(G$ , in a.u.) calculated at the M06-2X-D3/cc-pVTZ level.

| Species    | Correction | $E$          | $G$          |
|------------|------------|--------------|--------------|
| <b>I</b>   | 0.126395   | -2851.264050 | -2851.137655 |
| <b>II</b>  | 0.198701   | -3082.287540 | -3082.088839 |
| <b>III</b> | 0.197912   | -3480.489872 | -3480.291960 |
| <b>IV</b>  | 0.271499   | -4109.719512 | -4109.448013 |

**Table S6** The calculated absolute electronic energies ( $E$ , in a.u.) of cyclic OPSs (**I-IV**)

and their key charged states at the (U)M06-2X-D3/cc-pVTZ level.

|            | 0                | -1           | 1            | -2           | 2            |
|------------|------------------|--------------|--------------|--------------|--------------|
|            | <b>Vertical</b>  |              |              |              |              |
| <b>I</b>   | -2851.264050     | -2851.285614 | -2850.961329 | -2851.315535 | -2850.503570 |
| <b>II</b>  | -3082.287540     | -3082.301476 | -3081.988522 | -3082.177894 | -3081.554788 |
| <b>III</b> | -3480.489888     | -3480.510135 | -3480.190686 | -3480.407121 | -3479.760906 |
| <b>IV</b>  | -4109.719512     | -4109.739078 | -4109.424230 | -4109.633044 | -4109.005949 |
|            | <b>Adiabatic</b> |              |              |              |              |
| <b>I</b>   | -2851.264050     | -2851.317476 | -2850.968780 | -2851.221675 | -2850.530189 |
| <b>II</b>  | -3082.287540     | -3082.336205 | -3081.998207 | -3082.350439 | -3081.572171 |
| <b>III</b> | -3480.489888     | -3480.541272 | -3480.198834 | -3480.562522 | -3479.774452 |
| <b>IV</b>  | -4109.719512     | -4109.773022 | -4109.432844 | -4109.788813 | -4109.024060 |

**Table S7** The calculated absolute electronic energies ( $E$ , in a.u.), thermal free energies $(G$ , in a.u.), and the lithiation free energies ( $\Delta G$ , in eV) and the lithiation electronic energies ( $\Delta E$ , in eV) calculated at the (U)M06-2X-D3/ cc-pVTZ level.

| Species                                 | Correction | $E$ (a.u.)   | $G$ (a.u.)   | $\Delta E$ (eV) | $\Delta G$ (eV) |
|-----------------------------------------|------------|--------------|--------------|-----------------|-----------------|
| <b>I-Li</b>                             | 0.123725   | -2858.826179 | -2858.702454 | -2.22           | -1.92           |
| <b>I-Li<sub>a</sub></b>                 | 0.124006   | -2858.814248 | -2858.690242 | -1.89           | -1.59           |
| <b>I-Li<sub>b</sub></b>                 | 0.120790   | -2858.807864 | -2858.687074 | -1.72           | -1.51           |
| <b>I-Li<sub>c</sub></b>                 | 0.121688   | -2858.802189 | -2858.680501 | -1.56           | -1.33           |
| <b>I-Li<sub>d</sub></b>                 | 0.121866   | -2858.801648 | -2858.679782 | -1.55           | -1.31           |
| <b>I-Li<sub>f</sub></b>                 | 0.119766   | -2858.775851 | -2858.656085 | -0.85           | -0.66           |
| <b>I-Li<sub>2</sub></b>                 | 0.125903   | -2866.468580 | -2866.342677 | -6.62           | -5.90           |
| <sup>3U</sup> <b>[I-Li<sub>2</sub>]</b> | 0.119635   | -2866.414695 | -2866.295060 | -5.15           | -4.61           |



**Table S8** The calculated absolute electronic energies ( $E$ , in a.u.), thermal free energies ( $G$ , in a.u.), the lithiation free energies ( $\Delta G$ , in eV) and the lithiation electronic energies ( $\Delta E$ , in eV) calculated at the M06-2X-D3/cc-pVTZ level.

| Species             | Correction<br>(a.u.) | $E$ (a.u.)   | $G$ (a.u.)   | $\Delta E$ (eV) | $\Delta G$ (eV) |
|---------------------|----------------------|--------------|--------------|-----------------|-----------------|
| I-Li                | 0.123725             | -2858.826179 | -2858.702454 | -2.2            | -1.9            |
| I-Li <sub>2</sub>   | 0.125903             | -2866.468580 | -2866.342677 | -6.6            | -5.9            |
| I-Li <sub>3</sub>   | 0.123122             | -2874.047835 | -2873.924713 | -9.3            | -8.3            |
| I-Li <sub>4</sub>   | 0.126477             | -2881.682443 | -2881.555966 | -13.5           | -12.0           |
| I-Li <sub>5</sub>   | 0.123251             | -2889.254758 | -2889.131507 | -16.0           | -14.2           |
| I-Li <sub>6</sub>   | 0.127047             | -2896.899624 | -2896.772577 | -20.4           | -18.2           |
| I-Li <sub>7</sub>   | 0.126315             | -2904.465607 | -2904.339292 | -22.8           | -20.2           |
| I-Li <sub>8</sub>   | 0.127514             | -2912.116508 | -2911.988994 | -27.4           | -24.5           |
| I-Li <sub>9</sub>   | 0.128610             | -2919.648669 | -2919.520059 | -28.8           | -25.5           |
| I-Li <sub>10</sub>  | 0.128760             | -2927.182449 | -2927.053689 | -30.2           | -26.5           |
| I-Li <sub>11</sub>  | 0.129855             | -2934.703091 | -2934.573236 | -31.3           | -27.2           |
| I-Li <sub>12</sub>  | 0.131113             | -2942.234540 | -2942.103427 | -32.7           | -28.2           |
| II-Li               | 0.198998             | -3089.843533 | -3089.644535 | -2.0            | -1.7            |
| II-Li <sub>2</sub>  | 0.199611             | -3097.493038 | -3097.293427 | -6.6            | -5.9            |
| II-Li <sub>3</sub>  | 0.200501             | -3105.056030 | -3104.855529 | -8.9            | -7.7            |
| II-Li <sub>4</sub>  | 0.200193             | -3112.714228 | -3112.514035 | -13.7           | -12.2           |
| II-Li <sub>5</sub>  | 0.199261             | -3120.280896 | -3120.081635 | -16.1           | -14.2           |
| II-Li <sub>6</sub>  | 0.202978             | -3127.936261 | -3127.733283 | -20.8           | -18.5           |
| II-Li <sub>7</sub>  | 0.201117             | -3135.475706 | -3135.274589 | -22.4           | -19.8           |
| II-Li <sub>8</sub>  | 0.199936             | -3143.033743 | -3142.833807 | -24.5           | -21.6           |
| II-Li <sub>9</sub>  | 0.198250             | -3150.560221 | -3150.361971 | -25.8           | -22.5           |
| II-Li <sub>10</sub> | 0.199215             | -3158.072339 | -3157.873124 | -26.6           | -23.0           |
| II-Li <sub>11</sub> | 0.196233             | -3165.598937 | -3165.402704 | -27.9           | -23.9           |

|                            |          |              |              |       |       |
|----------------------------|----------|--------------|--------------|-------|-------|
| <b>II-Li<sub>12</sub></b>  | 0.196228 | -3173.131503 | -3172.935275 | -29.3 | -25.0 |
| <b>III-Li</b>              | 0.198303 | -3488.056754 | -3487.858451 | -2.3  | -2.0  |
| <b>III-Li<sub>2</sub></b>  | 0.200073 | -3495.698492 | -3495.498419 | -6.7  | -6.0  |
| <b>III-Li<sub>3</sub></b>  | 0.199619 | -3503.282763 | -3503.083144 | -9.5  | -8.5  |
| <b>III-Li<sub>4</sub></b>  | 0.202079 | -3510.918193 | -3510.716114 | -13.8 | -12.2 |
| <b>III-Li<sub>5</sub></b>  | 0.199855 | -3518.481457 | -3518.281602 | -16.0 | -14.2 |
| <b>III-Li<sub>6</sub></b>  | 0.199807 | -3526.123701 | -3525.923894 | -20.4 | -18.2 |
| <b>III-Li<sub>7</sub></b>  | 0.199392 | -3533.700992 | -3533.501600 | -23.0 | -20.5 |
| <b>III-Li<sub>8</sub></b>  | 0.200212 | -3541.319573 | -3541.119361 | -26.8 | -23.9 |
| <b>III-Li<sub>9</sub></b>  | 0.198612 | -3548.845136 | -3548.646524 | -28.0 | -24.8 |
| <b>III-Li<sub>10</sub></b> | 0.200381 | -3556.395880 | -3556.195499 | -29.9 | -26.3 |
| <b>III-Li<sub>11</sub></b> | 0.199943 | -3563.911448 | -3563.711505 | -30.9 | -26.9 |
| <b>III-Li<sub>12</sub></b> | 0.202334 | -3571.448074 | -3571.245740 | -32.4 | -27.9 |
| <b>IV-Li</b>               | 0.273229 | -4117.285482 | -4117.012253 | -2.3  | -1.9  |
| <b>IV-Li<sub>2</sub></b>   | 0.272531 | -4124.924668 | -4124.652137 | -6.6  | -5.9  |
| <b>IV-Li<sub>3</sub></b>   | 0.273708 | -4132.514020 | -4132.240312 | -9.6  | -8.4  |
| <b>IV-Li<sub>4</sub></b>   | 0.276921 | -4140.159878 | -4139.882957 | -14.1 | -12.5 |
| <b>IV-Li<sub>5</sub></b>   | 0.275151 | -4147.734627 | -4147.459476 | -16.6 | -14.7 |
| <b>IV-Li<sub>6</sub></b>   | 0.277084 | -4155.380300 | -4155.103216 | -21.1 | -18.8 |
| <b>IV-Li<sub>7</sub></b>   | 0.273325 | -4162.951029 | -4162.677704 | -23.6 | -21.0 |
| <b>IV-Li<sub>8</sub></b>   | 0.275740 | -4170.610705 | -4170.334965 | -28.5 | -25.4 |
| <b>IV-Li<sub>9</sub></b>   | 0.276802 | -4178.140886 | -4177.864084 | -29.8 | -26.4 |
| <b>IV-Li<sub>10</sub></b>  | 0.277099 | -4185.749975 | -4185.472876 | -33.3 | -29.5 |
| <b>IV-Li<sub>11</sub></b>  | 0.275674 | -4193.276390 | -4193.000716 | -34.5 | -30.4 |
| <b>IV-Li<sub>12</sub></b>  | 0.277743 | -4200.814695 | -4200.536952 | -36.1 | -31.6 |

**Table S9** Cartesian coordinates of all the studied molecules.

|          |              |              |              |
|----------|--------------|--------------|--------------|
| <b>I</b> |              |              |              |
| C        | -3.135642000 | -1.314296000 | 0.000000000  |
| C        | -2.661946000 | -0.812200000 | -1.207216000 |

|   |              |              |              |
|---|--------------|--------------|--------------|
| C | -1.723408000 | 0.221281000  | -1.200590000 |
| C | -1.260666000 | 0.754740000  | 0.000000000  |
| C | -1.723408000 | 0.221281000  | 1.200590000  |
| C | -2.661946000 | -0.812200000 | 1.207216000  |
| H | -3.860634000 | -2.121868000 | 0.000000000  |
| H | -3.007257000 | -1.225689000 | -2.149814000 |
| H | -0.531123000 | 1.559753000  | 0.000000000  |
| H | -3.007257000 | -1.225689000 | 2.149814000  |
| C | 1.979231000  | -0.319900000 | 0.000000000  |
| C | 1.573310000  | -0.895090000 | -1.201572000 |
| C | 0.816804000  | -2.068400000 | -1.205815000 |
| C | 0.454260000  | -2.661167000 | 0.000000000  |
| C | 0.816804000  | -2.068400000 | 1.205815000  |
| C | 1.573310000  | -0.895090000 | 1.201572000  |
| H | 2.556917000  | 0.599833000  | 0.000000000  |
| H | 0.492513000  | -2.490034000 | -2.151828000 |
| H | -0.148509000 | -3.563091000 | 0.000000000  |
| H | 0.492513000  | -2.490034000 | 2.151828000  |
| S | -1.254327000 | 0.860218000  | -2.812455000 |
| S | 0.665955000  | 1.565816000  | -2.562503000 |
| S | 1.923766000  | -0.086863000 | -2.755720000 |
| S | 1.923766000  | -0.086863000 | 2.755720000  |
| S | 0.665955000  | 1.565816000  | 2.562503000  |
| S | -1.254327000 | 0.860218000  | 2.812455000  |

## II

|   |              |              |              |
|---|--------------|--------------|--------------|
| C | 2.388556000  | -1.946076000 | 0.523847000  |
| C | 1.535646000  | -1.695998000 | -0.550685000 |
| C | 0.246951000  | -2.230170000 | -0.545544000 |
| C | -0.186784000 | -3.008665000 | 0.523674000  |
| C | 0.676364000  | -3.254049000 | 1.589283000  |
| C | 1.962343000  | -2.726893000 | 1.599008000  |
| H | 1.872804000  | -1.072882000 | -1.375294000 |
| H | -1.192191000 | -3.416245000 | 0.527715000  |
| H | 0.335302000  | -3.860008000 | 2.422364000  |
| H | 2.633277000  | -2.902874000 | 2.432982000  |
| S | -0.747703000 | -1.832997000 | -1.984391000 |
| S | -2.665149000 | -2.239892000 | -1.394525000 |
| C | 0.595484000  | 2.483838000  | -0.661012000 |
| C | 1.087317000  | 2.579881000  | -1.963359000 |

|   |              |              |              |
|---|--------------|--------------|--------------|
| C | 2.360953000  | 2.101096000  | -2.260182000 |
| C | 3.147479000  | 1.527019000  | -1.269426000 |
| C | 2.635516000  | 1.404631000  | 0.023920000  |
| C | 1.359965000  | 1.874640000  | 0.334255000  |
| H | 0.475910000  | 3.026764000  | -2.741868000 |
| H | 2.741980000  | 2.184113000  | -3.272822000 |
| H | 4.141294000  | 1.152606000  | -1.492897000 |
| H | 0.968022000  | 1.759874000  | 1.340095000  |
| S | 4.016508000  | -1.212206000 | 0.516685000  |
| S | 3.596071000  | 0.662211000  | 1.336048000  |
| S | -0.996033000 | 3.256505000  | -0.382119000 |
| S | -1.674481000 | 2.510715000  | 1.412821000  |
| C | -3.966894000 | 1.041169000  | 1.516244000  |
| C | -4.785566000 | -0.043268000 | 1.208355000  |
| C | -4.358504000 | -1.014916000 | 0.314694000  |
| C | -3.092467000 | -0.910880000 | -0.271298000 |
| C | -2.251237000 | 0.148593000  | 0.048418000  |
| C | -2.705207000 | 1.127927000  | 0.933554000  |
| H | -4.307569000 | 1.819522000  | 2.190651000  |
| H | -5.770939000 | -0.120812000 | 1.656163000  |
| H | -5.004351000 | -1.852910000 | 0.067978000  |
| H | -1.260437000 | 0.226194000  | -0.389848000 |

### III

|   |              |              |              |
|---|--------------|--------------|--------------|
| C | 0.620196000  | -2.636912000 | 0.269763000  |
| C | -0.702131000 | -2.671509000 | -0.182568000 |
| C | -1.736389000 | -2.310858000 | 0.679298000  |
| C | -1.460588000 | -1.868937000 | 1.975716000  |
| C | -0.138485000 | -1.795260000 | 2.398116000  |
| C | 0.902228000  | -2.192538000 | 1.559003000  |
| H | -0.930591000 | -2.975476000 | -1.199710000 |
| H | -2.273943000 | -1.577696000 | 2.632375000  |
| H | 0.089291000  | -1.440886000 | 3.397931000  |
| H | 1.929157000  | -2.162247000 | 1.907871000  |
| C | 2.668199000  | 1.656273000  | 0.000528000  |
| C | 2.550382000  | 2.065964000  | -1.325199000 |
| C | 2.787159000  | 1.154701000  | -2.355930000 |
| C | 3.115446000  | -0.162048000 | -2.064690000 |
| C | 3.210962000  | -0.572936000 | -0.730967000 |
| C | 2.999367000  | 0.333427000  | 0.301974000  |

|   |              |              |              |
|---|--------------|--------------|--------------|
| H | 2.266021000  | 3.089784000  | -1.545032000 |
| H | 2.701240000  | 1.474817000  | -3.388807000 |
| H | 3.283832000  | -0.881954000 | -2.859018000 |
| H | 3.072341000  | 0.015686000  | 1.337257000  |
| C | -0.714040000 | 3.731541000  | 0.193465000  |
| C | -1.613038000 | 3.981846000  | -0.833019000 |
| C | -2.401827000 | 2.951628000  | -1.344211000 |
| C | -2.252735000 | 1.655508000  | -0.854549000 |
| C | -1.313576000 | 1.381564000  | 0.144119000  |
| C | -0.571107000 | 2.429483000  | 0.682614000  |
| H | -0.119628000 | 4.533035000  | 0.620154000  |
| H | -1.731862000 | 4.990468000  | -1.214744000 |
| H | -3.141258000 | 3.153278000  | -2.112184000 |
| H | -1.168297000 | 0.367172000  | 0.505571000  |
| S | -3.404691000 | -2.472244000 | 0.073444000  |
| S | -3.268419000 | 0.390795000  | -1.605319000 |
| S | 1.849431000  | -3.221320000 | -0.888347000 |
| S | 3.593720000  | -2.265943000 | -0.306337000 |
| S | 2.340663000  | 2.819931000  | 1.313033000  |
| S | 0.537240000  | 2.068986000  | 2.036679000  |
| S | -4.127722000 | -0.530929000 | 0.054194000  |

#### IV

|   |              |              |              |
|---|--------------|--------------|--------------|
| C | -2.183832000 | 2.650887000  | 1.264046000  |
| C | -2.705818000 | 1.724933000  | 2.163539000  |
| C | -3.552735000 | 0.707984000  | 1.738656000  |
| C | -3.859663000 | 0.606101000  | 0.383410000  |
| C | -3.326356000 | 1.508858000  | -0.534339000 |
| C | -2.502126000 | 2.543393000  | -0.086421000 |
| H | -1.530692000 | 3.445255000  | 1.608068000  |
| H | -2.453309000 | 1.805002000  | 3.215794000  |
| H | -3.956690000 | -0.009721000 | 2.444206000  |
| H | -3.537296000 | 1.396582000  | -1.595041000 |
| C | 1.322610000  | 2.774958000  | -1.863982000 |
| C | 2.379381000  | 1.875700000  | -1.927605000 |
| C | 3.121011000  | 1.579582000  | -0.784476000 |
| C | 2.773351000  | 2.159666000  | 0.436721000  |
| C | 1.696772000  | 3.047743000  | 0.512204000  |
| C | 0.987261000  | 3.365334000  | -0.643012000 |
| H | 0.752448000  | 3.022576000  | -2.753737000 |

|             |              |              |              |
|-------------|--------------|--------------|--------------|
| H           | 2.641008000  | 1.414864000  | -2.874482000 |
| H           | 3.964425000  | 0.897778000  | -0.832889000 |
| H           | 1.421864000  | 3.485823000  | 1.466606000  |
| C           | -2.117593000 | -2.152125000 | -0.534065000 |
| C           | -0.810626000 | -2.588199000 | -0.766258000 |
| C           | -0.271686000 | -3.646741000 | -0.044242000 |
| C           | -1.061549000 | -4.280192000 | 0.913753000  |
| C           | -2.358441000 | -3.856829000 | 1.164658000  |
| C           | -2.884470000 | -2.785894000 | 0.435227000  |
| H           | -2.525891000 | -1.325058000 | -1.106322000 |
| H           | 0.744791000  | -3.978950000 | -0.221915000 |
| H           | -0.650140000 | -5.109814000 | 1.479187000  |
| H           | -2.958843000 | -4.347930000 | 1.924419000  |
| C           | 4.189537000  | -2.663599000 | -0.954767000 |
| C           | 2.874198000  | -2.197969000 | -0.904873000 |
| C           | 2.446294000  | -1.423422000 | 0.171568000  |
| C           | 3.348196000  | -1.109698000 | 1.189916000  |
| C           | 4.661413000  | -1.579483000 | 1.151601000  |
| C           | 5.074883000  | -2.356097000 | 0.074572000  |
| H           | 4.522986000  | -3.260798000 | -1.798796000 |
| H           | 1.434464000  | -1.032899000 | 0.213974000  |
| H           | 5.348166000  | -1.320698000 | 1.950321000  |
| H           | 6.095247000  | -2.722100000 | 0.029905000  |
| S           | -4.944100000 | -0.654324000 | -0.289238000 |
| S           | -4.547592000 | -2.297772000 | 0.879099000  |
| S           | 0.086657000  | -1.634884000 | -1.991365000 |
| S           | -1.935141000 | 3.676147000  | -1.350223000 |
| S           | -0.294391000 | 4.609128000  | -0.522119000 |
| S           | 3.709838000  | 1.759721000  | 1.901275000  |
| S           | 1.828612000  | -2.665950000 | -2.282557000 |
| S           | 2.799080000  | -0.028894000 | 2.499858000  |
| <b>I-Li</b> |              |              |              |
| C           | -1.038733000 | 2.686484000  | 1.619412000  |
| C           | -2.024835000 | 2.131722000  | 0.801346000  |
| C           | -1.649567000 | 1.520998000  | -0.390607000 |
| C           | -0.306424000 | 1.462846000  | -0.774951000 |
| C           | 0.674778000  | 1.947186000  | 0.081337000  |
| C           | 0.300033000  | 2.575083000  | 1.279394000  |
| H           | -1.319110000 | 3.175702000  | 2.546694000  |



|    |              |              |              |
|----|--------------|--------------|--------------|
| H  | -3.070502000 | 2.159402000  | 1.087990000  |
| H  | -0.040805000 | 1.069349000  | -1.753801000 |
| H  | 1.067649000  | 2.965573000  | 1.941818000  |
| C  | 0.256727000  | -2.092418000 | 0.393642000  |
| C  | -0.814915000 | -1.553264000 | 1.106269000  |
| C  | -0.582130000 | -0.740893000 | 2.210555000  |
| C  | 0.738795000  | -0.461271000 | 2.575287000  |
| C  | 1.806643000  | -0.914944000 | 1.814206000  |
| C  | 1.586215000  | -1.728909000 | 0.682585000  |
| H  | 0.061963000  | -2.801436000 | -0.411685000 |
| H  | -1.414098000 | -0.307678000 | 2.755530000  |
| H  | 0.928166000  | 0.169947000  | 3.438412000  |
| H  | 2.824995000  | -0.637677000 | 2.064548000  |
| S  | -2.929643000 | 0.799692000  | -1.405755000 |
| S  | -2.349386000 | -1.203557000 | -1.418789000 |
| S  | -2.483999000 | -1.879410000 | 0.544410000  |
| S  | 2.873032000  | -2.153438000 | -0.436378000 |
| S  | 2.719099000  | 0.600504000  | -1.788789000 |
| S  | 2.427046000  | 1.857733000  | -0.225984000 |
| Li | 1.061273000  | -1.044435000 | -1.453269000 |

**I-Li<sub>a</sub>**

|   |              |              |              |
|---|--------------|--------------|--------------|
| C | -0.149918000 | 2.255287000  | 2.363444000  |
| C | -1.333885000 | 2.045946000  | 1.648256000  |
| C | -1.264510000 | 1.780417000  | 0.274562000  |
| C | -0.028462000 | 1.700708000  | -0.374467000 |
| C | 1.159486000  | 1.872882000  | 0.351654000  |
| C | 1.086869000  | 2.164233000  | 1.728020000  |
| H | -0.193714000 | 2.452950000  | 3.429525000  |
| H | -2.296128000 | 2.067315000  | 2.148524000  |
| H | 0.030189000  | 1.447546000  | -1.430229000 |
| H | 2.006135000  | 2.279983000  | 2.294131000  |
| C | 0.066645000  | -1.836815000 | -0.341796000 |
| C | -1.145398000 | -1.825691000 | 0.348960000  |
| C | -1.181309000 | -1.913707000 | 1.751097000  |
| C | 0.034699000  | -2.020321000 | 2.443267000  |
| C | 1.250490000  | -2.004336000 | 1.761829000  |
| C | 1.308806000  | -1.932916000 | 0.340694000  |
| H | 0.080253000  | -1.757797000 | -1.424749000 |
| H | -2.128237000 | -1.890206000 | 2.278544000  |

|    |              |              |              |
|----|--------------|--------------|--------------|
| H  | 0.028479000  | -2.084236000 | 3.527114000  |
| H  | 2.185554000  | -2.057080000 | 2.309604000  |
| S  | -2.815084000 | 1.573319000  | -0.598865000 |
| S  | -2.458291000 | -0.105916000 | -1.759415000 |
| S  | -2.719232000 | -1.735477000 | -0.509263000 |
| S  | 2.816243000  | -1.954205000 | -0.499667000 |
| S  | 2.485375000  | 0.397720000  | -1.921423000 |
| S  | 2.767114000  | 1.694869000  | -0.377255000 |
| Li | 0.082798000  | -0.032514000 | 1.249541000  |

**I-Li<sub>b</sub>**

|    |              |              |              |
|----|--------------|--------------|--------------|
| C  | 0.636553000  | 0.426380000  | 2.525091000  |
| C  | -0.569872000 | 0.956033000  | 2.049181000  |
| C  | -0.561963000 | 1.670417000  | 0.859569000  |
| C  | 0.633250000  | 1.852840000  | 0.147391000  |
| C  | 1.861586000  | 1.348366000  | 0.628049000  |
| C  | 1.824691000  | 0.623063000  | 1.842258000  |
| H  | 0.636637000  | -0.151604000 | 3.444401000  |
| H  | -1.501803000 | 0.791233000  | 2.578665000  |
| H  | 0.591476000  | 2.306393000  | -0.845473000 |
| H  | 2.756331000  | 0.218342000  | 2.223724000  |
| C  | -0.562934000 | -1.352464000 | -0.643420000 |
| C  | -1.863221000 | -1.377536000 | -0.139527000 |
| C  | -2.167588000 | -2.087288000 | 1.020867000  |
| C  | -1.157538000 | -2.781540000 | 1.684823000  |
| C  | 0.145548000  | -2.747872000 | 1.208389000  |
| C  | 0.436428000  | -2.027323000 | 0.044648000  |
| H  | -0.321559000 | -0.795972000 | -1.544952000 |
| H  | -3.181389000 | -2.082388000 | 1.407904000  |
| H  | -1.388553000 | -3.336221000 | 2.588344000  |
| H  | 0.938426000  | -3.272324000 | 1.734204000  |
| S  | -2.098106000 | 2.352400000  | 0.242278000  |
| S  | -2.359551000 | 1.265745000  | -1.509804000 |
| S  | -3.217359000 | -0.530829000 | -0.950505000 |
| S  | 2.145415000  | -2.070748000 | -0.485856000 |
| S  | 2.329838000  | -0.922465000 | -2.078570000 |
| S  | 3.383049000  | 1.701915000  | -0.195369000 |
| Li | 2.202737000  | 3.522596000  | 0.231484000  |

**I-Li<sub>c</sub>**

|    |              |              |              |
|----|--------------|--------------|--------------|
| C  | -0.703100000 | 3.016294000  | 1.642859000  |
| C  | -1.802383000 | 2.425278000  | 1.021202000  |
| C  | -1.599109000 | 1.569623000  | -0.058989000 |
| C  | -0.310769000 | 1.296143000  | -0.523543000 |
| C  | 0.775343000  | 1.879052000  | 0.120047000  |
| C  | 0.584501000  | 2.743204000  | 1.205396000  |
| H  | -0.856677000 | 3.680843000  | 2.487260000  |
| H  | -2.807788000 | 2.613376000  | 1.384834000  |
| H  | -0.144383000 | 0.601925000  | -1.343281000 |
| H  | 1.442116000  | 3.184562000  | 1.705307000  |
| C  | 0.355117000  | -2.158958000 | 0.228809000  |
| C  | -0.856928000 | -1.773799000 | 0.789514000  |
| C  | -0.886810000 | -0.976210000 | 1.938675000  |
| C  | 0.307995000  | -0.547009000 | 2.512571000  |
| C  | 1.523387000  | -0.905970000 | 1.942953000  |
| C  | 1.566612000  | -1.725975000 | 0.798435000  |
| H  | 0.378907000  | -2.777137000 | -0.662851000 |
| H  | -1.843148000 | -0.677653000 | 2.357044000  |
| H  | 0.286238000  | 0.087571000  | 3.392483000  |
| H  | 2.460360000  | -0.558356000 | 2.365749000  |
| S  | -3.079961000 | 0.887913000  | -0.807075000 |
| S  | -2.474600000 | -0.929545000 | -1.576260000 |
| S  | -2.401767000 | -2.255059000 | 0.027354000  |
| S  | 3.083043000  | -2.189936000 | 0.091874000  |
| S  | 2.418437000  | 0.258773000  | -1.981736000 |
| S  | 2.478969000  | 1.578232000  | -0.360066000 |
| Li | 2.325094000  | 2.396266000  | -2.566533000 |

**I-Li<sub>d</sub>**

|   |              |             |              |
|---|--------------|-------------|--------------|
| C | -0.642714000 | 3.176366000 | 1.494577000  |
| C | -1.751102000 | 2.546700000 | 0.922115000  |
| C | -1.556429000 | 1.581605000 | -0.059489000 |
| C | -0.262763000 | 1.233789000 | -0.474028000 |
| C | 0.837180000  | 1.869106000 | 0.109148000  |
| C | 0.641970000  | 2.850692000 | 1.096791000  |
| H | -0.792859000 | 3.926421000 | 2.264611000  |
| H | -2.755050000 | 2.795863000 | 1.250845000  |
| H | -0.104186000 | 0.415971000 | -1.176120000 |
| H | 1.501037000  | 3.339818000 | 1.546182000  |

|    |              |              |              |
|----|--------------|--------------|--------------|
| C  | 0.342429000  | -2.185986000 | 0.246980000  |
| C  | -0.861862000 | -1.804347000 | 0.827205000  |
| C  | -0.878422000 | -0.999757000 | 1.971434000  |
| C  | 0.324823000  | -0.561101000 | 2.520345000  |
| C  | 1.532250000  | -0.911382000 | 1.927089000  |
| C  | 1.560350000  | -1.734903000 | 0.785057000  |
| H  | 0.353960000  | -2.808623000 | -0.641940000 |
| H  | -1.829001000 | -0.704726000 | 2.405211000  |
| H  | 0.316031000  | 0.074417000  | 3.399915000  |
| H  | 2.473859000  | -0.551986000 | 2.329202000  |
| S  | -3.051320000 | 0.872227000  | -0.748028000 |
| S  | -2.473864000 | -0.949036000 | -1.526275000 |
| S  | -2.412213000 | -2.278913000 | 0.075387000  |
| S  | 3.063947000  | -2.169985000 | 0.028963000  |
| S  | 2.426334000  | 0.253129000  | -1.996259000 |
| S  | 2.536340000  | 1.564542000  | -0.377724000 |
| Li | 1.231452000  | 2.158908000  | -2.292759000 |

**I-Li<sub>e</sub>**

|   |              |              |              |
|---|--------------|--------------|--------------|
| C | -2.839834000 | 1.753275000  | 0.000000000  |
| C | -2.476986000 | 1.163648000  | 1.206043000  |
| C | -1.760753000 | -0.034765000 | 1.200731000  |
| C | -1.402543000 | -0.647863000 | 0.000000000  |
| C | -1.760753000 | -0.034765000 | -1.200731000 |
| C | -2.476986000 | 1.163648000  | -1.206043000 |
| H | -3.393497000 | 2.686663000  | 0.000000000  |
| H | -2.734772000 | 1.633375000  | 2.150250000  |
| H | -0.842562000 | -1.578163000 | 0.000000000  |
| H | -2.734772000 | 1.633375000  | -2.150250000 |
| C | 1.858276000  | -0.030782000 | 0.000000000  |
| C | 1.584186000  | 0.642980000  | 1.236761000  |
| C | 1.064865000  | 1.936048000  | 1.225626000  |
| C | 0.844261000  | 2.614859000  | 0.000000000  |
| C | 1.064865000  | 1.936048000  | -1.225626000 |
| C | 1.584186000  | 0.642980000  | -1.236761000 |
| H | 2.264440000  | -1.034200000 | 0.000000000  |
| H | 0.835045000  | 2.419802000  | 2.169841000  |
| H | 0.460611000  | 3.627131000  | 0.000000000  |
| H | 0.835045000  | 2.419802000  | -2.169841000 |
| S | -1.437131000 | -0.751573000 | 2.809053000  |

|    |              |              |              |
|----|--------------|--------------|--------------|
| S  | 0.362942000  | -1.714966000 | 2.603906000  |
| S  | 1.847928000  | -0.160604000 | 2.777851000  |
| S  | 1.847928000  | -0.160604000 | -2.777851000 |
| S  | 0.362942000  | -1.714966000 | -2.603906000 |
| S  | -1.437131000 | -0.751573000 | -2.809053000 |
| Li | 2.951385000  | 1.876304000  | 0.000000000  |

**I-Li<sub>2</sub>**

|    |              |              |              |
|----|--------------|--------------|--------------|
| C  | -0.660930000 | 2.567276000  | 2.041033000  |
| C  | -1.732505000 | 2.189794000  | 1.230111000  |
| C  | -1.476904000 | 1.687141000  | -0.041751000 |
| C  | -0.167631000 | 1.566983000  | -0.514952000 |
| C  | 0.892497000  | 1.906211000  | 0.317296000  |
| C  | 0.644779000  | 2.413429000  | 1.600452000  |
| H  | -0.849305000 | 2.964577000  | 3.033412000  |
| H  | -2.754339000 | 2.272529000  | 1.585500000  |
| H  | 0.017860000  | 1.244409000  | -1.535908000 |
| H  | 1.477228000  | 2.691220000  | 2.240628000  |
| C  | 0.000318000  | -2.242633000 | 0.166346000  |
| C  | -1.161853000 | -1.730588000 | 0.752979000  |
| C  | -1.098567000 | -1.035240000 | 1.952589000  |
| C  | 0.149088000  | -0.836913000 | 2.551004000  |
| C  | 1.310072000  | -1.294990000 | 1.947635000  |
| C  | 1.263558000  | -2.004260000 | 0.731369000  |
| H  | -0.081847000 | -2.856427000 | -0.731250000 |
| H  | -2.002039000 | -0.629104000 | 2.393975000  |
| H  | 0.211631000  | -0.288578000 | 3.485934000  |
| H  | 2.275374000  | -1.115469000 | 2.411960000  |
| S  | -2.880318000 | 1.262227000  | -1.066989000 |
| S  | -2.422846000 | -0.655463000 | -1.710338000 |
| S  | -2.729726000 | -1.920761000 | -0.087693000 |
| S  | 2.724607000  | -2.536067000 | -0.130307000 |
| S  | 2.631207000  | 0.848844000  | -2.047688000 |
| S  | 2.600103000  | 1.826859000  | -0.194929000 |
| Li | 3.698955000  | -0.427731000 | -0.372859000 |
| Li | 1.356198000  | -1.109148000 | -1.454416000 |

**<sup>3</sup>U[I-Li<sub>2</sub>]**

|   |             |             |             |
|---|-------------|-------------|-------------|
| C | 0.999450000 | 0.129339000 | 2.397482000 |
|---|-------------|-------------|-------------|

|    |              |              |              |
|----|--------------|--------------|--------------|
| C  | 1.140669000  | -1.139191000 | 1.830203000  |
| C  | 0.074650000  | -1.659104000 | 1.105772000  |
| C  | -1.138348000 | -0.976378000 | 1.010250000  |
| C  | -1.246023000 | 0.308926000  | 1.524092000  |
| C  | -0.163888000 | 0.865978000  | 2.220981000  |
| H  | 1.835275000  | 0.567725000  | 2.932607000  |
| H  | 2.081592000  | -1.675733000 | 1.900294000  |
| H  | -2.008606000 | -1.454647000 | 0.566540000  |
| H  | -0.236282000 | 1.875036000  | 2.615233000  |
| C  | 1.602147000  | 0.551796000  | -1.167362000 |
| C  | 2.771936000  | 0.700244000  | -0.390464000 |
| C  | 3.006545000  | 1.923620000  | 0.277501000  |
| C  | 2.084374000  | 2.951606000  | 0.166406000  |
| C  | 0.932627000  | 2.786394000  | -0.604433000 |
| C  | 0.671624000  | 1.583141000  | -1.286959000 |
| H  | 1.443515000  | -0.386362000 | -1.693318000 |
| H  | 3.910525000  | 2.035084000  | 0.866353000  |
| H  | 2.258148000  | 3.896317000  | 0.671943000  |
| H  | 0.228789000  | 3.608415000  | -0.703424000 |
| S  | 0.308718000  | -3.194229000 | 0.232382000  |
| S  | -0.732143000 | -3.017151000 | -1.444114000 |
| S  | 3.877301000  | -0.610197000 | -0.227211000 |
| S  | -0.760316000 | 1.399594000  | -2.320765000 |
| S  | -3.794904000 | 0.315417000  | -0.220452000 |
| S  | -2.729993000 | 1.274530000  | 1.319179000  |
| Li | -2.522618000 | 2.109436000  | -0.992306000 |
| Li | -1.686095000 | -0.546606000 | -1.368147000 |

**I-Li<sub>3</sub>**

|   |              |              |              |
|---|--------------|--------------|--------------|
| C | -0.531834000 | 1.967898000  | 1.742505000  |
| C | -1.466473000 | 1.632581000  | 0.762426000  |
| C | -1.055612000 | 1.572987000  | -0.566954000 |
| C | 0.263048000  | 1.868047000  | -0.913143000 |
| C | 1.204273000  | 2.120559000  | 0.077670000  |
| C | 0.801755000  | 2.184762000  | 1.416393000  |
| H | -0.841009000 | 2.007586000  | 2.782469000  |
| H | -2.492080000 | 1.396458000  | 1.030232000  |
| H | 0.552449000  | 1.915159000  | -1.961061000 |
| H | 1.531974000  | 2.387666000  | 2.194471000  |
| C | -0.480492000 | -1.821129000 | 0.463426000  |

|    |              |              |              |
|----|--------------|--------------|--------------|
| C  | -1.547895000 | -1.682093000 | 1.379737000  |
| C  | -1.256261000 | -1.334487000 | 2.727883000  |
| C  | 0.052823000  | -1.090725000 | 3.096638000  |
| C  | 1.085198000  | -1.178781000 | 2.157003000  |
| C  | 0.837413000  | -1.552694000 | 0.816461000  |
| H  | -0.672461000 | -2.165596000 | -0.549432000 |
| H  | -2.071683000 | -1.250078000 | 3.437992000  |
| H  | 0.286154000  | -0.817801000 | 4.120833000  |
| H  | 2.108928000  | -0.979222000 | 2.460777000  |
| S  | -2.199930000 | 1.123536000  | -1.864351000 |
| S  | -1.137492000 | -0.347670000 | -2.955378000 |
| S  | -3.178206000 | -1.851893000 | 0.877401000  |
| S  | 2.119790000  | -1.745984000 | -0.375911000 |
| S  | 3.188789000  | 1.448860000  | -2.197759000 |
| S  | 2.929285000  | 2.366462000  | -0.318693000 |
| Li | 3.594055000  | 0.050319000  | -0.397963000 |
| Li | 1.198169000  | -0.203242000 | -2.020802000 |
| Li | -2.584696000 | -1.211287000 | -1.383120000 |

#### **I-Li<sub>4</sub>**

|   |              |              |              |
|---|--------------|--------------|--------------|
| C | 2.823982000  | -1.735417000 | 1.563840000  |
| C | 3.266420000  | -0.735467000 | 0.688773000  |
| C | 2.482641000  | -0.421971000 | -0.431000000 |
| C | 1.305006000  | -1.129683000 | -0.673207000 |
| C | 0.832479000  | -2.093104000 | 0.223330000  |
| C | 1.606010000  | -2.390231000 | 1.364309000  |
| H | 3.414438000  | -1.970494000 | 2.443516000  |
| H | 4.173413000  | -0.179236000 | 0.899901000  |
| H | 0.756077000  | -0.939096000 | -1.585675000 |
| H | 1.256969000  | -3.127830000 | 2.080005000  |
| C | -1.306528000 | 1.746653000  | 0.560234000  |
| C | -0.548955000 | 1.494598000  | 1.713677000  |
| C | -1.046716000 | 0.561474000  | 2.645642000  |
| C | -2.279818000 | -0.053069000 | 2.429933000  |
| C | -3.021423000 | 0.217048000  | 1.285218000  |
| C | -2.528304000 | 1.103727000  | 0.301914000  |
| H | -0.955687000 | 2.482518000  | -0.158815000 |
| H | -0.492450000 | 0.374753000  | 3.562487000  |
| H | -2.672808000 | -0.738810000 | 3.174463000  |
| H | -4.019396000 | -0.209785000 | 1.178936000  |

|    |              |              |              |
|----|--------------|--------------|--------------|
| S  | 2.955119000  | 0.917920000  | -1.505608000 |
| S  | 1.155045000  | 1.670210000  | -2.310286000 |
| S  | 1.050652000  | 2.235499000  | 1.964581000  |
| S  | -3.322615000 | 1.309995000  | -1.268865000 |
| S  | -1.512566000 | -2.066793000 | -1.733979000 |
| S  | -0.712437000 | -2.910684000 | 0.001524000  |
| Li | -3.324919000 | -0.959482000 | -0.838506000 |
| Li | -1.063602000 | 0.477068000  | -1.754930000 |
| Li | 1.636108000  | 2.665551000  | -0.270809000 |
| Li | 1.158921000  | -0.042381000 | 1.534688000  |

**I-Li<sub>5</sub>**

|    |              |              |              |
|----|--------------|--------------|--------------|
| C  | -2.846339000 | 2.463517000  | -0.371964000 |
| C  | -3.455179000 | 1.262916000  | 0.007201000  |
| C  | -2.862238000 | 0.027776000  | -0.319232000 |
| C  | -1.646639000 | 0.048517000  | -1.036172000 |
| C  | -1.030582000 | 1.248316000  | -1.408747000 |
| C  | -1.633042000 | 2.473620000  | -1.062142000 |
| H  | -3.313414000 | 3.405907000  | -0.102903000 |
| H  | -4.378500000 | 1.269017000  | 0.574807000  |
| H  | -1.152209000 | -0.878074000 | -1.313906000 |
| H  | -1.158511000 | 3.410669000  | -1.335478000 |
| C  | 1.676930000  | -0.324545000 | 1.580012000  |
| C  | 0.748736000  | 0.620669000  | 2.041007000  |
| C  | 1.014616000  | 1.984163000  | 1.802894000  |
| C  | 2.169033000  | 2.369080000  | 1.124831000  |
| C  | 3.072352000  | 1.418554000  | 0.660761000  |
| C  | 2.835023000  | 0.043441000  | 0.873556000  |
| H  | 1.507237000  | -1.373158000 | 1.814992000  |
| H  | 0.343743000  | 2.738582000  | 2.210644000  |
| H  | 2.374170000  | 3.424550000  | 0.971669000  |
| H  | 3.999107000  | 1.732140000  | 0.182605000  |
| S  | -3.605642000 | -1.469454000 | 0.258996000  |
| S  | -0.254760000 | -3.143875000 | -0.004139000 |
| S  | -0.754397000 | 0.138338000  | 2.863967000  |
| S  | 3.903165000  | -1.188839000 | 0.163462000  |
| S  | 1.142335000  | -0.636468000 | -2.575345000 |
| S  | 0.490778000  | 1.326463000  | -2.305766000 |
| Li | 3.076668000  | 0.179382000  | -1.523487000 |
| Li | 1.747339000  | -1.942334000 | -0.491658000 |



|    |              |              |              |
|----|--------------|--------------|--------------|
| Li | -1.503659000 | -1.710194000 | 1.583168000  |
| Li | -1.293792000 | 1.332001000  | 0.975372000  |
| Li | -2.433662000 | -3.180332000 | -0.801152000 |

**I-Li<sub>6</sub>**

|    |              |              |              |
|----|--------------|--------------|--------------|
| C  | -3.197622000 | 2.421082000  | -0.259982000 |
| C  | -3.693879000 | 1.144354000  | 0.022675000  |
| C  | -2.981519000 | -0.006373000 | -0.378229000 |
| C  | -1.773118000 | 0.191692000  | -1.085655000 |
| C  | -1.254028000 | 1.467086000  | -1.344037000 |
| C  | -1.974077000 | 2.599486000  | -0.910158000 |
| H  | -3.758361000 | 3.293158000  | 0.062329000  |
| H  | -4.623138000 | 1.022534000  | 0.567589000  |
| H  | -1.238813000 | -0.673084000 | -1.466866000 |
| H  | -1.585316000 | 3.595764000  | -1.094858000 |
| C  | 1.552693000  | -0.447822000 | 1.738738000  |
| C  | 0.636057000  | 0.564119000  | 2.071222000  |
| C  | 0.956114000  | 1.888858000  | 1.712413000  |
| C  | 2.139770000  | 2.168869000  | 1.037699000  |
| C  | 3.015103000  | 1.147935000  | 0.672580000  |
| C  | 2.714750000  | -0.192491000 | 0.994697000  |
| H  | 1.328726000  | -1.461095000 | 2.053829000  |
| H  | 0.296112000  | 2.701152000  | 2.010403000  |
| H  | 2.385011000  | 3.197091000  | 0.789784000  |
| H  | 3.965663000  | 1.390779000  | 0.196834000  |
| S  | -3.558818000 | -1.603228000 | 0.081462000  |
| S  | -0.073049000 | -3.189812000 | 0.290905000  |
| S  | -0.900110000 | 0.164928000  | 2.864347000  |
| S  | 3.706162000  | -1.516917000 | 0.333341000  |
| S  | 1.091773000  | -0.126734000 | -2.531246000 |
| S  | 0.289893000  | 1.766036000  | -2.157644000 |
| Li | 3.130515000  | -0.036757000 | -1.399401000 |
| Li | 2.159836000  | -3.369109000 | 0.444062000  |
| Li | 0.711837000  | -1.156969000 | -0.396327000 |
| Li | -1.620747000 | 1.328045000  | 1.040027000  |
| Li | -1.996323000 | -3.123706000 | -0.832907000 |
| Li | -1.518560000 | -1.870914000 | 1.631782000  |

**I-Li<sub>7</sub>**

|                         |              |              |              |
|-------------------------|--------------|--------------|--------------|
| C                       | 4.072537000  | -1.635979000 | 0.239050000  |
| C                       | 4.143498000  | -0.243634000 | 0.335905000  |
| C                       | 3.115418000  | 0.561808000  | -0.201527000 |
| C                       | 2.038755000  | -0.089903000 | -0.839688000 |
| C                       | 1.936608000  | -1.493270000 | -0.924027000 |
| C                       | 2.978576000  | -2.265816000 | -0.360217000 |
| H                       | 4.868899000  | -2.241342000 | 0.661851000  |
| H                       | 4.977249000  | 0.235673000  | 0.836194000  |
| H                       | 1.229717000  | 0.511012000  | -1.244700000 |
| H                       | 2.923225000  | -3.347620000 | -0.410194000 |
| C                       | -1.894298000 | 0.334981000  | 1.475494000  |
| C                       | -0.864308000 | -0.485469000 | 1.966939000  |
| C                       | -1.049018000 | -1.881086000 | 1.899210000  |
| C                       | -2.218661000 | -2.408054000 | 1.349032000  |
| C                       | -3.211164000 | -1.572739000 | 0.826597000  |
| C                       | -3.056587000 | -0.172087000 | 0.875639000  |
| H                       | -1.754047000 | 1.408307000  | 1.552479000  |
| H                       | -0.277971000 | -2.545133000 | 2.276831000  |
| H                       | -2.345340000 | -3.484786000 | 1.296193000  |
| H                       | -4.111305000 | -2.000283000 | 0.394329000  |
| S                       | 3.168403000  | 2.303809000  | 0.086140000  |
| S                       | -0.532539000 | 3.081714000  | -0.672823000 |
| S                       | 0.604262000  | 0.249350000  | 2.628665000  |
| S                       | -4.246303000 | 0.911988000  | 0.115166000  |
| S                       | -1.477304000 | -0.616513000 | -2.690079000 |
| S                       | 0.559799000  | -2.327699000 | -1.646722000 |
| Li                      | -3.543945000 | -0.283573000 | -1.770529000 |
| Li                      | -2.700565000 | 2.701214000  | -0.186402000 |
| Li                      | -0.787678000 | 1.476565000  | -2.238128000 |
| Li                      | 2.172235000  | -0.888932000 | 1.366733000  |
| Li                      | 1.604441000  | 3.457187000  | -1.214002000 |
| Li                      | 0.846193000  | 2.070854000  | 1.016953000  |
| Li                      | -1.150562000 | -1.223551000 | -0.422282000 |
| <b>I-Li<sub>8</sub></b> |              |              |              |
| C                       | 4.182811000  | -1.656803000 | 0.398930000  |
| C                       | 4.174282000  | -0.262603000 | 0.326199000  |
| C                       | 3.106233000  | 0.415467000  | -0.303398000 |
| C                       | 2.068875000  | -0.365819000 | -0.855883000 |
| C                       | 2.051089000  | -1.775650000 | -0.774664000 |

|    |              |              |              |
|----|--------------|--------------|--------------|
| C  | 3.130701000  | -2.412919000 | -0.124326000 |
| H  | 5.007371000  | -2.160332000 | 0.894623000  |
| H  | 4.974913000  | 0.319847000  | 0.768021000  |
| H  | 1.223324000  | 0.141777000  | -1.318909000 |
| H  | 3.129306000  | -3.494019000 | -0.043237000 |
| C  | -1.936842000 | 0.383199000  | 1.591393000  |
| C  | -0.856247000 | -0.438734000 | 1.951510000  |
| C  | -1.008492000 | -1.828062000 | 1.793677000  |
| C  | -2.202370000 | -2.349433000 | 1.287539000  |
| C  | -3.242897000 | -1.508323000 | 0.886490000  |
| C  | -3.115994000 | -0.111354000 | 1.021780000  |
| H  | -1.825627000 | 1.449778000  | 1.766781000  |
| H  | -0.201629000 | -2.498605000 | 2.073475000  |
| H  | -2.309172000 | -3.424788000 | 1.178735000  |
| H  | -4.159826000 | -1.929990000 | 0.484352000  |
| S  | 3.077686000  | 2.178608000  | -0.221405000 |
| S  | -0.657847000 | 2.995260000  | -0.755520000 |
| S  | 0.625099000  | 0.302196000  | 2.584154000  |
| S  | -4.372885000 | 0.999285000  | 0.419939000  |
| S  | -2.101848000 | -0.561257000 | -2.738376000 |
| S  | 0.708882000  | -2.768014000 | -1.353660000 |
| Li | -3.977689000 | -0.083745000 | -1.618178000 |
| Li | -2.743846000 | 2.681280000  | 0.041940000  |
| Li | -1.270090000 | 1.456718000  | -2.276371000 |
| Li | 2.212087000  | -0.892877000 | 1.416697000  |
| Li | 1.427010000  | 3.193180000  | -1.510320000 |
| Li | 0.807698000  | 2.020216000  | 0.869670000  |
| Li | -1.228784000 | -1.346612000 | -0.654900000 |
| Li | -0.328859000 | -1.818314000 | -3.211494000 |

**I-Li<sub>9</sub>**

|   |             |              |              |
|---|-------------|--------------|--------------|
| C | 4.118316000 | -1.644771000 | 0.540887000  |
| C | 4.078127000 | -0.255557000 | 0.409444000  |
| C | 3.090082000 | 0.357821000  | -0.389663000 |
| C | 2.162755000 | -0.479118000 | -1.045462000 |
| C | 2.182010000 | -1.886324000 | -0.918777000 |
| C | 3.178031000 | -2.457658000 | -0.098215000 |
| H | 4.879142000 | -2.099944000 | 1.167827000  |
| H | 4.792590000 | 0.370568000  | 0.931742000  |
| H | 1.381633000 | -0.017748000 | -1.649137000 |

|    |              |              |              |
|----|--------------|--------------|--------------|
| H  | 3.205992000  | -3.535177000 | 0.018362000  |
| C  | -2.117869000 | 0.474620000  | 1.549769000  |
| C  | -0.984072000 | -0.366115000 | 1.787869000  |
| C  | -1.080152000 | -1.739803000 | 1.571410000  |
| C  | -2.310244000 | -2.341792000 | 1.158790000  |
| C  | -3.439269000 | -1.486515000 | 0.917229000  |
| C  | -3.362420000 | -0.117157000 | 1.090987000  |
| H  | -2.152001000 | 1.408729000  | 2.118322000  |
| H  | -0.226374000 | -2.375959000 | 1.806856000  |
| H  | -2.440393000 | -3.416678000 | 1.230922000  |
| H  | -4.387483000 | -1.930126000 | 0.610155000  |
| S  | 3.035065000  | 2.125168000  | -0.438759000 |
| S  | -0.739750000 | 2.936847000  | -0.766696000 |
| S  | 0.523390000  | 0.418959000  | 2.343182000  |
| S  | -4.626767000 | 1.008081000  | 0.514691000  |
| S  | -1.804353000 | -0.457551000 | -2.286656000 |
| S  | 1.009812000  | -2.967876000 | -1.691234000 |
| Li | -3.794006000 | -0.407444000 | -1.120818000 |
| Li | -2.712618000 | 2.410168000  | 0.408458000  |
| Li | -1.777285000 | 1.801092000  | -2.454903000 |
| Li | 2.003422000  | -0.938652000 | 1.258139000  |
| Li | 1.287039000  | 2.916174000  | -1.727067000 |
| Li | 0.918658000  | 2.306391000  | 0.911248000  |
| Li | -1.093763000 | -2.139891000 | -0.681318000 |
| Li | -0.149069000 | -1.647087000 | -3.217532000 |
| Li | -0.866837000 | 0.571716000  | -0.273517000 |

**I-Li<sub>10</sub>**

|   |              |              |              |
|---|--------------|--------------|--------------|
| C | 4.215008000  | -1.621082000 | 0.482664000  |
| C | 4.144884000  | -0.225024000 | 0.438165000  |
| C | 3.113094000  | 0.415338000  | -0.283103000 |
| C | 2.179688000  | -0.408268000 | -0.948198000 |
| C | 2.236658000  | -1.816749000 | -0.925150000 |
| C | 3.268864000  | -2.417908000 | -0.171801000 |
| H | 5.009293000  | -2.096717000 | 1.050233000  |
| H | 4.870841000  | 0.382422000  | 0.967061000  |
| H | 1.382017000  | 0.074645000  | -1.509822000 |
| H | 3.330241000  | -3.499632000 | -0.129677000 |
| C | -2.128361000 | 0.385559000  | 1.720570000  |
| C | -1.024178000 | -0.457614000 | 1.910294000  |

|    |              |              |              |
|----|--------------|--------------|--------------|
| C  | -1.208720000 | -1.844645000 | 1.700304000  |
| C  | -2.469178000 | -2.333150000 | 1.354780000  |
| C  | -3.538594000 | -1.468106000 | 1.107924000  |
| C  | -3.364810000 | -0.079097000 | 1.234870000  |
| H  | -1.999284000 | 1.444571000  | 1.926113000  |
| H  | -0.386277000 | -2.530369000 | 1.890503000  |
| H  | -2.622716000 | -3.407537000 | 1.275349000  |
| H  | -4.508144000 | -1.865004000 | 0.816966000  |
| S  | 2.976067000  | 2.172933000  | -0.255842000 |
| S  | -0.797698000 | 2.730091000  | -0.734779000 |
| S  | 0.528341000  | 0.247209000  | 2.374674000  |
| S  | -4.593860000 | 1.068931000  | 0.656467000  |
| S  | -1.973369000 | -0.638398000 | -2.169050000 |
| S  | 1.081183000  | -2.826670000 | -1.809169000 |
| Li | -3.962437000 | -0.237950000 | -1.197828000 |
| Li | -2.958849000 | 2.697185000  | -0.032089000 |
| Li | -1.172426000 | 1.519095000  | -2.799221000 |
| Li | 2.150350000  | -0.987365000 | 1.278402000  |
| Li | 1.269969000  | 2.628066000  | -1.892553000 |
| Li | 0.854796000  | 2.231335000  | 0.903552000  |
| Li | -1.050528000 | -2.318446000 | -0.921156000 |
| Li | 0.067333000  | -1.104465000 | -3.245607000 |
| Li | -1.035738000 | 0.482194000  | -0.350905000 |
| Li | 1.208700000  | 1.430157000  | -4.835544000 |

### I-Li<sub>11</sub>

|   |              |              |              |
|---|--------------|--------------|--------------|
| C | 3.867177000  | -1.770971000 | 0.628134000  |
| C | 4.028207000  | -0.389780000 | 0.473825000  |
| C | 3.164698000  | 0.332902000  | -0.378499000 |
| C | 2.155294000  | -0.389095000 | -1.049574000 |
| C | 1.994143000  | -1.786442000 | -0.932166000 |
| C | 2.855995000  | -2.467371000 | -0.044142000 |
| H | 4.532454000  | -2.312905000 | 1.293877000  |
| H | 4.809605000  | 0.140193000  | 1.006947000  |
| H | 1.511143000  | 0.155985000  | -1.739519000 |
| H | 2.745233000  | -3.539066000 | 0.080080000  |
| C | -2.186537000 | 0.470011000  | 1.601970000  |
| C | -0.962587000 | -0.271040000 | 1.847053000  |
| C | -0.907236000 | -1.635367000 | 1.601207000  |
| C | -2.071441000 | -2.364414000 | 1.219782000  |

|    |              |              |              |
|----|--------------|--------------|--------------|
| C  | -3.296105000 | -1.648859000 | 1.023319000  |
| C  | -3.370491000 | -0.274998000 | 1.168519000  |
| H  | -2.439603000 | 1.246231000  | 2.345022000  |
| H  | 0.014278000  | -2.188613000 | 1.789012000  |
| H  | -2.061472000 | -3.449223000 | 1.252656000  |
| H  | -4.201170000 | -2.206551000 | 0.776647000  |
| S  | 3.329609000  | 2.086840000  | -0.540828000 |
| S  | -0.529238000 | 2.857239000  | -0.635473000 |
| S  | 0.463357000  | 0.681806000  | 2.402007000  |
| S  | -4.774379000 | 0.686495000  | 0.658887000  |
| S  | -2.075249000 | -0.194167000 | -2.045663000 |
| S  | 0.797703000  | -2.677668000 | -1.875573000 |
| Li | -4.083482000 | -0.707957000 | -1.041368000 |
| Li | -2.858270000 | 1.647165000  | -0.501455000 |
| Li | -1.046608000 | 1.804322000  | -2.768011000 |
| Li | 1.920202000  | -0.763907000 | 1.267091000  |
| Li | 1.474330000  | 2.680052000  | -2.009690000 |
| Li | 1.361927000  | 2.304328000  | 0.685951000  |
| Li | -1.265810000 | -2.079445000 | -0.837248000 |
| Li | -0.166710000 | -0.899825000 | -3.239460000 |
| Li | -0.701283000 | 0.517404000  | -0.239036000 |
| Li | 1.139811000  | 1.560874000  | -4.921809000 |
| Li | -1.124556000 | 2.412128000  | 1.546734000  |

### I-Li<sub>12</sub>

|   |              |              |              |
|---|--------------|--------------|--------------|
| C | 3.678681000  | -1.811893000 | 0.781334000  |
| C | 3.896569000  | -0.448152000 | 0.593375000  |
| C | 3.137409000  | 0.274375000  | -0.355741000 |
| C | 2.155782000  | -0.437501000 | -1.078273000 |
| C | 1.935155000  | -1.818340000 | -0.913229000 |
| C | 2.709219000  | -2.502304000 | 0.040966000  |
| H | 4.267715000  | -2.349495000 | 1.518203000  |
| H | 4.642496000  | 0.078290000  | 1.178346000  |
| H | 1.577495000  | 0.102472000  | -1.827651000 |
| H | 2.582875000  | -3.572897000 | 0.176515000  |
| C | -2.051802000 | 0.462303000  | 1.391939000  |
| C | -0.780452000 | -0.212716000 | 1.809718000  |
| C | -0.595342000 | -1.560833000 | 1.720746000  |
| C | -1.596087000 | -2.537094000 | 1.184775000  |
| C | -2.927174000 | -1.855402000 | 0.947741000  |

|    |              |              |              |
|----|--------------|--------------|--------------|
| C  | -3.145791000 | -0.514530000 | 1.067711000  |
| H  | -2.414528000 | 1.060113000  | 2.252318000  |
| H  | 0.313388000  | -1.988347000 | 2.167322000  |
| H  | -1.726414000 | -3.359852000 | 1.904702000  |
| H  | -3.783778000 | -2.501839000 | 0.743246000  |
| S  | 3.389350000  | 2.004945000  | -0.562908000 |
| S  | -0.386965000 | 2.994873000  | -0.710974000 |
| S  | 0.499462000  | 0.898158000  | 2.456426000  |
| S  | -4.716797000 | 0.261181000  | 0.696672000  |
| S  | -2.124769000 | -0.033190000 | -2.178901000 |
| S  | 0.692512000  | -2.666138000 | -1.862409000 |
| Li | -4.033776000 | -0.885138000 | -1.128034000 |
| Li | -2.997042000 | 1.493470000  | -0.423178000 |
| Li | -1.048705000 | 1.985199000  | -2.782793000 |
| Li | 1.626190000  | -0.682232000 | 1.204890000  |
| Li | 1.564712000  | 2.659921000  | -2.035271000 |
| Li | 1.422629000  | 2.420838000  | 0.696432000  |
| Li | -1.473217000 | -1.743309000 | -0.751329000 |
| Li | -0.237739000 | -0.792238000 | -3.297981000 |
| Li | -0.736907000 | 0.720350000  | -0.330460000 |
| Li | 1.185140000  | 1.524512000  | -4.968940000 |
| Li | -1.161276000 | 2.432495000  | 1.427017000  |
| Li | -0.247297000 | -3.705785000 | 0.035275000  |

## II-Li

|   |              |              |              |
|---|--------------|--------------|--------------|
| C | 3.005080000  | -1.027829000 | -0.077734000 |
| C | 2.160411000  | -0.311984000 | 0.803693000  |
| C | 2.303529000  | 1.070321000  | 0.967007000  |
| C | 3.295272000  | 1.768596000  | 0.277277000  |
| C | 4.105163000  | 1.077066000  | -0.621422000 |
| C | 3.953543000  | -0.291526000 | -0.814800000 |
| H | 1.422136000  | -0.854365000 | 1.394348000  |
| H | 3.411306000  | 2.837138000  | 0.426749000  |
| H | 4.870458000  | 1.614522000  | -1.173304000 |
| H | 4.586222000  | -0.824319000 | -1.516831000 |
| S | 1.177923000  | 1.894090000  | 2.085981000  |
| S | 0.501075000  | 3.453040000  | 0.867858000  |
| C | -2.448297000 | -1.277802000 | 0.923344000  |
| C | -2.093321000 | -1.734972000 | 2.191639000  |
| C | -1.018505000 | -2.614040000 | 2.313298000  |

|    |              |              |              |
|----|--------------|--------------|--------------|
| C  | -0.265090000 | -2.995621000 | 1.208318000  |
| C  | -0.596572000 | -2.511400000 | -0.067015000 |
| C  | -1.722330000 | -1.680147000 | -0.196646000 |
| H  | -2.643183000 | -1.412348000 | 3.070467000  |
| H  | -0.749754000 | -2.988658000 | 3.296155000  |
| H  | 0.602520000  | -3.635954000 | 1.320519000  |
| H  | -2.034555000 | -1.380820000 | -1.190572000 |
| S  | 2.889530000  | -2.765856000 | -0.254604000 |
| S  | 0.394184000  | -2.820066000 | -1.509653000 |
| S  | -3.801527000 | -0.105883000 | 0.851348000  |
| S  | -3.797151000 | 0.538829000  | -1.112263000 |
| C  | -1.434804000 | 0.936091000  | -2.422947000 |
| C  | -0.136799000 | 1.424407000  | -2.585278000 |
| C  | 0.447526000  | 2.202810000  | -1.584599000 |
| C  | -0.281128000 | 2.500078000  | -0.424846000 |
| C  | -1.585263000 | 2.031303000  | -0.268604000 |
| C  | -2.160490000 | 1.246803000  | -1.267607000 |
| H  | -1.875536000 | 0.295050000  | -3.181201000 |
| H  | 0.420193000  | 1.186312000  | -3.486356000 |
| H  | 1.460639000  | 2.575566000  | -1.691679000 |
| H  | -2.133953000 | 2.248184000  | 0.643292000  |
| Li | 0.557144000  | -0.546557000 | -0.962907000 |

## II-Li<sub>2</sub>

|   |              |              |              |
|---|--------------|--------------|--------------|
| C | -3.507866000 | -1.034245000 | -0.183467000 |
| C | -2.513145000 | -1.066345000 | 0.818613000  |
| C | -1.288507000 | -1.718859000 | 0.623541000  |
| C | -1.008524000 | -2.356286000 | -0.591324000 |
| C | -1.997914000 | -2.357870000 | -1.584685000 |
| C | -3.216031000 | -1.711959000 | -1.393369000 |
| H | -2.709776000 | -0.552402000 | 1.755239000  |
| H | -0.059391000 | -2.851020000 | -0.757322000 |
| H | -1.796944000 | -2.853472000 | -2.529342000 |
| H | -3.961603000 | -1.707868000 | -2.181585000 |
| S | -0.122056000 | -1.574765000 | 1.972842000  |
| S | 1.402065000  | -2.863843000 | 1.481287000  |
| C | 0.900725000  | 2.405930000  | 0.773410000  |
| C | 0.233028000  | 2.432979000  | 1.998060000  |
| C | -1.155938000 | 2.353445000  | 2.008302000  |
| C | -1.873344000 | 2.236589000  | 0.822118000  |



|    |              |              |              |
|----|--------------|--------------|--------------|
| C  | -1.207697000 | 2.201513000  | -0.414674000 |
| C  | 0.195378000  | 2.287041000  | -0.420546000 |
| H  | 0.789803000  | 2.499852000  | 2.927752000  |
| H  | -1.687337000 | 2.369876000  | 2.954951000  |
| H  | -2.956860000 | 2.151049000  | 0.863075000  |
| H  | 0.722056000  | 2.276443000  | -1.370580000 |
| S  | -5.013335000 | -0.167380000 | 0.058490000  |
| S  | -2.056823000 | 2.000492000  | -1.973918000 |
| S  | 2.687965000  | 2.548317000  | 0.863537000  |
| S  | 3.356893000  | 1.805669000  | -0.925595000 |
| C  | 3.800996000  | -0.728580000 | -1.774050000 |
| C  | 3.676046000  | -2.111392000 | -1.760588000 |
| C  | 2.925516000  | -2.746084000 | -0.772753000 |
| C  | 2.315257000  | -1.976507000 | 0.215800000  |
| C  | 2.438758000  | -0.588312000 | 0.223577000  |
| C  | 3.178612000  | 0.031879000  | -0.778556000 |
| H  | 4.380708000  | -0.238310000 | -2.550474000 |
| H  | 4.159730000  | -2.701511000 | -2.532031000 |
| H  | 2.809416000  | -3.825602000 | -0.774943000 |
| H  | 1.959984000  | -0.008660000 | 1.005685000  |
| Li | -1.470877000 | -0.091139000 | -1.123826000 |
| Li | -4.228202000 | 1.473857000  | -1.307230000 |

### II-Li<sub>3</sub>

|   |              |              |              |
|---|--------------|--------------|--------------|
| C | -3.831459000 | 0.147310000  | -0.061205000 |
| C | -2.873329000 | -0.071187000 | 0.950310000  |
| C | -2.076512000 | -1.229426000 | 1.014313000  |
| C | -2.280978000 | -2.240888000 | 0.052238000  |
| C | -3.253133000 | -2.059839000 | -0.939296000 |
| C | -4.003235000 | -0.881653000 | -1.017739000 |
| H | -2.744433000 | 0.689910000  | 1.711951000  |
| H | -1.688763000 | -3.148112000 | 0.106102000  |
| H | -3.412430000 | -2.842670000 | -1.675449000 |
| H | -4.735555000 | -0.745019000 | -1.806137000 |
| S | -0.848596000 | -1.367472000 | 2.287302000  |
| S | 0.868043000  | -3.319674000 | 1.249661000  |
| C | 2.044861000  | 1.948724000  | 0.771762000  |
| C | 1.401853000  | 2.261810000  | 1.981703000  |
| C | 0.028425000  | 2.511028000  | 1.974221000  |
| C | -0.717880000 | 2.395519000  | 0.800642000  |

|    |              |              |              |
|----|--------------|--------------|--------------|
| C  | -0.091591000 | 2.054777000  | -0.412045000 |
| C  | 1.305079000  | 1.875889000  | -0.411381000 |
| H  | 1.962951000  | 2.292972000  | 2.910447000  |
| H  | -0.475093000 | 2.747829000  | 2.905885000  |
| H  | -1.795357000 | 2.537794000  | 0.832535000  |
| H  | 1.792793000  | 1.645575000  | -1.350099000 |
| S  | -4.737545000 | 1.657006000  | -0.137472000 |
| S  | -0.972148000 | 1.779964000  | -1.929202000 |
| S  | 3.769390000  | 1.497696000  | 0.893279000  |
| S  | 4.173974000  | 0.594855000  | -0.927045000 |
| C  | 2.328155000  | -0.831517000 | -2.301603000 |
| C  | 1.313279000  | -1.774203000 | -2.467505000 |
| C  | 0.853835000  | -2.514684000 | -1.386313000 |
| C  | 1.419860000  | -2.353153000 | -0.102273000 |
| C  | 2.457502000  | -1.411181000 | 0.051044000  |
| C  | 2.900942000  | -0.663361000 | -1.040897000 |
| H  | 2.654642000  | -0.219952000 | -3.137005000 |
| H  | 0.872547000  | -1.916134000 | -3.449696000 |
| H  | 0.075263000  | -3.258488000 | -1.520458000 |
| H  | 2.933852000  | -1.303507000 | 1.023822000  |
| Li | -1.768024000 | -0.334086000 | -1.168024000 |
| Li | -3.158505000 | 2.542974000  | -1.484946000 |
| Li | 0.578412000  | 0.143785000  | 1.228925000  |

#### **II-Li<sub>4</sub>**

|   |              |              |              |
|---|--------------|--------------|--------------|
| C | -2.793075000 | 1.698787000  | -0.132547000 |
| C | -1.923423000 | 1.129103000  | -1.069405000 |
| C | -0.647927000 | 1.677364000  | -1.292257000 |
| C | -0.295125000 | 2.835935000  | -0.580109000 |
| C | -1.171721000 | 3.409965000  | 0.336290000  |
| C | -2.418150000 | 2.840649000  | 0.577565000  |
| H | -2.230222000 | 0.253159000  | -1.635464000 |
| H | 0.681379000  | 3.286187000  | -0.736680000 |
| H | -0.867386000 | 4.296395000  | 0.882614000  |
| H | -3.098173000 | 3.269613000  | 1.305174000  |
| S | 0.457444000  | 0.845847000  | -2.414591000 |
| S | 4.239797000  | 0.350246000  | -2.009012000 |
| C | -0.692122000 | -2.296968000 | -0.210467000 |
| C | -1.201906000 | -2.862889000 | -1.387177000 |
| C | -2.565039000 | -2.822921000 | -1.661455000 |

|    |              |              |              |
|----|--------------|--------------|--------------|
| C  | -3.452666000 | -2.193378000 | -0.791646000 |
| C  | -2.955449000 | -1.601934000 | 0.366618000  |
| C  | -1.593390000 | -1.679207000 | 0.670954000  |
| H  | -0.516650000 | -3.335392000 | -2.083378000 |
| H  | -2.939094000 | -3.276644000 | -2.573809000 |
| H  | -4.510706000 | -2.126953000 | -1.022043000 |
| H  | -1.243923000 | -1.229269000 | 1.601046000  |
| S  | -4.408001000 | 0.972492000  | 0.103238000  |
| S  | -3.992207000 | -0.604197000 | 1.422202000  |
| S  | 1.061295000  | -2.294467000 | 0.105191000  |
| S  | 0.994134000  | 0.850271000  | 2.405294000  |
| C  | 3.525003000  | -0.301272000 | 2.477492000  |
| C  | 4.668756000  | -0.812295000 | 1.847606000  |
| C  | 4.903991000  | -0.590944000 | 0.501193000  |
| C  | 4.019202000  | 0.211357000  | -0.248372000 |
| C  | 2.918474000  | 0.771691000  | 0.411696000  |
| C  | 2.607151000  | 0.477575000  | 1.753457000  |
| H  | 3.353318000  | -0.479987000 | 3.537949000  |
| H  | 5.369788000  | -1.409708000 | 2.423308000  |
| H  | 5.762375000  | -1.031897000 | 0.006694000  |
| H  | 2.233537000  | 1.422355000  | -0.128909000 |
| Li | 1.490633000  | -1.424678000 | 2.247042000  |
| Li | 0.084801000  | 0.139693000  | 0.279494000  |
| Li | 2.555210000  | 1.813161000  | -2.608067000 |
| Li | 2.126302000  | -0.829713000 | -1.515230000 |

## **II-Li<sub>5</sub>**

|   |              |              |              |
|---|--------------|--------------|--------------|
| C | -2.458880000 | 1.871448000  | 0.028712000  |
| C | -1.767185000 | 1.140710000  | -0.962087000 |
| C | -0.518009000 | 1.563144000  | -1.446719000 |
| C | 0.022228000  | 2.761240000  | -0.949261000 |
| C | -0.650690000 | 3.491836000  | 0.022342000  |
| C | -1.869127000 | 3.049156000  | 0.525354000  |
| H | -2.226156000 | 0.244305000  | -1.375903000 |
| H | 0.977068000  | 3.129058000  | -1.318475000 |
| H | -0.215383000 | 4.412231000  | 0.398616000  |
| H | -2.393450000 | 3.619980000  | 1.285774000  |
| S | 0.354954000  | 0.533296000  | -2.616376000 |
| S | 4.214915000  | 0.494809000  | -1.899386000 |
| C | -0.521341000 | -2.601402000 | -0.494025000 |

|    |              |              |              |
|----|--------------|--------------|--------------|
| C  | -1.165837000 | -2.753995000 | -1.730447000 |
| C  | -2.541308000 | -2.549336000 | -1.828020000 |
| C  | -3.293454000 | -2.128627000 | -0.732946000 |
| C  | -2.664128000 | -1.933974000 | 0.502596000  |
| C  | -1.298687000 | -2.237109000 | 0.614752000  |
| H  | -0.584938000 | -3.020611000 | -2.606936000 |
| H  | -3.027473000 | -2.682906000 | -2.789450000 |
| H  | -4.350233000 | -1.906062000 | -0.833669000 |
| H  | -0.843322000 | -2.139981000 | 1.594760000  |
| S  | -4.009924000 | 1.328041000  | 0.677132000  |
| S  | -3.501144000 | -1.225472000 | 1.884905000  |
| S  | 1.258095000  | -2.719556000 | -0.335657000 |
| S  | 0.506802000  | 0.297241000  | 2.153344000  |
| C  | 3.211138000  | -0.113989000 | 2.536961000  |
| C  | 4.507559000  | -0.338550000 | 2.053666000  |
| C  | 4.826977000  | -0.116654000 | 0.722999000  |
| C  | 3.858623000  | 0.400406000  | -0.158733000 |
| C  | 2.591377000  | 0.703439000  | 0.356563000  |
| C  | 2.224479000  | 0.393534000  | 1.676891000  |
| H  | 2.962325000  | -0.318285000 | 3.575407000  |
| H  | 5.265510000  | -0.721229000 | 2.730727000  |
| H  | 5.814921000  | -0.350895000 | 0.342408000  |
| H  | 1.840889000  | 1.146768000  | -0.290016000 |
| Li | 1.629478000  | -1.776811000 | 1.796441000  |
| Li | -2.072891000 | 0.711228000  | 2.039940000  |
| Li | 2.418846000  | 1.608612000  | -2.832771000 |
| Li | 2.257861000  | -0.985619000 | -1.696379000 |
| Li | -0.049233000 | -0.391473000 | -0.191100000 |

## **II-Li<sub>6</sub>**

|   |              |             |              |
|---|--------------|-------------|--------------|
| C | -0.695757000 | 1.656787000 | 0.374017000  |
| C | -0.500479000 | 1.032952000 | -0.864699000 |
| C | 0.213430000  | 1.654901000 | -1.911286000 |
| C | 0.689229000  | 2.957710000 | -1.685236000 |
| C | 0.487685000  | 3.589549000 | -0.453715000 |
| C | -0.179797000 | 2.948712000 | 0.576294000  |
| H | -0.980446000 | 0.076070000 | -1.076607000 |
| H | 1.153143000  | 3.505681000 | -2.505490000 |
| H | 0.857572000  | 4.600350000 | -0.307343000 |
| H | -0.325862000 | 3.431475000 | 1.536161000  |

|    |              |              |              |
|----|--------------|--------------|--------------|
| S  | 0.541719000  | 0.814833000  | -3.441383000 |
| S  | 3.750299000  | -0.093622000 | -1.432118000 |
| C  | -1.225716000 | -2.561758000 | -0.924758000 |
| C  | -2.029326000 | -2.090103000 | -1.975576000 |
| C  | -3.359952000 | -1.780836000 | -1.725402000 |
| C  | -3.904087000 | -1.884333000 | -0.438540000 |
| C  | -3.113059000 | -2.338412000 | 0.634404000  |
| C  | -1.797384000 | -2.727711000 | 0.338392000  |
| H  | -1.598932000 | -1.944274000 | -2.960893000 |
| H  | -3.987094000 | -1.431876000 | -2.540359000 |
| H  | -4.952526000 | -1.645285000 | -0.265456000 |
| H  | -1.202428000 | -3.126811000 | 1.155267000  |
| S  | -1.562603000 | 0.843037000  | 1.697969000  |
| S  | -3.633444000 | -2.194969000 | 2.325679000  |
| S  | 0.525562000  | -2.809860000 | -1.122738000 |
| S  | 0.962136000  | -2.073866000 | 2.848154000  |
| C  | 1.839744000  | 0.571598000  | 2.700355000  |
| C  | 2.451721000  | 1.631929000  | 2.037837000  |
| C  | 3.053873000  | 1.461937000  | 0.792370000  |
| C  | 3.102452000  | 0.195439000  | 0.198261000  |
| C  | 2.574394000  | -0.882636000 | 0.927800000  |
| C  | 1.886910000  | -0.711559000 | 2.138559000  |
| H  | 1.310725000  | 0.730594000  | 3.633710000  |
| H  | 2.422850000  | 2.621928000  | 2.483406000  |
| H  | 3.485533000  | 2.314494000  | 0.275647000  |
| H  | 2.694573000  | -1.869392000 | 0.491056000  |
| Li | 1.181277000  | -3.516338000 | 1.018361000  |
| Li | 0.185418000  | -0.727412000 | 0.613192000  |
| Li | 2.521929000  | 1.581379000  | -2.456126000 |
| Li | 1.645679000  | -1.027460000 | -2.330525000 |
| Li | -1.390268000 | -1.334201000 | 2.881261000  |
| Li | -3.566744000 | -0.170953000 | 1.128363000  |

## **II-Li<sub>7</sub>**

|   |              |             |              |
|---|--------------|-------------|--------------|
| C | -0.616413000 | 2.098474000 | 0.753815000  |
| C | -0.713494000 | 1.108145000 | -0.330380000 |
| C | -0.362350000 | 1.575362000 | -1.656656000 |
| C | -0.204341000 | 2.924463000 | -1.914824000 |
| C | -0.320406000 | 3.894981000 | -0.871260000 |
| C | -0.485431000 | 3.455835000 | 0.439596000  |

|    |              |              |              |
|----|--------------|--------------|--------------|
| H  | -0.422523000 | 0.079581000  | -0.074172000 |
| H  | -0.071189000 | 3.248406000  | -2.946137000 |
| H  | -0.216073000 | 4.949886000  | -1.093078000 |
| H  | -0.523659000 | 4.174629000  | 1.254258000  |
| S  | -0.162850000 | 0.386105000  | -2.991325000 |
| S  | 3.336153000  | 0.186224000  | -1.320772000 |
| C  | -1.061948000 | -2.941133000 | -1.310095000 |
| C  | -1.908378000 | -3.025555000 | -2.430888000 |
| C  | -3.224017000 | -2.560554000 | -2.341065000 |
| C  | -3.724854000 | -1.993156000 | -1.163385000 |
| C  | -2.903321000 | -1.897967000 | -0.021291000 |
| C  | -1.589968000 | -2.387057000 | -0.134070000 |
| H  | -1.526230000 | -3.429938000 | -3.361543000 |
| H  | -3.865059000 | -2.614862000 | -3.215766000 |
| H  | -4.742118000 | -1.619488000 | -1.118966000 |
| H  | -0.943251000 | -2.279302000 | 0.731289000  |
| S  | -0.930009000 | 1.608648000  | 2.468722000  |
| S  | -3.443286000 | -1.121304000 | 1.469368000  |
| S  | 0.645226000  | -3.433648000 | -1.385429000 |
| S  | 0.734244000  | -2.161435000 | 2.911190000  |
| C  | 2.503161000  | -0.024032000 | 3.203537000  |
| C  | 3.347324000  | 0.965174000  | 2.689006000  |
| C  | 3.592353000  | 1.081163000  | 1.314498000  |
| C  | 2.994663000  | 0.175412000  | 0.416447000  |
| C  | 2.124487000  | -0.786786000 | 0.956110000  |
| C  | 1.868085000  | -0.923773000 | 2.328848000  |
| H  | 2.311089000  | -0.088228000 | 4.268615000  |
| H  | 3.815532000  | 1.668452000  | 3.371081000  |
| H  | 4.259642000  | 1.847545000  | 0.935500000  |
| H  | 1.620837000  | -1.454606000 | 0.264398000  |
| Li | 0.961802000  | -3.539856000 | 0.979654000  |
| Li | 1.239706000  | 1.342107000  | 1.698076000  |
| Li | 1.760962000  | 1.649485000  | -2.204453000 |
| Li | 1.465417000  | -1.236868000 | -2.089378000 |
| Li | -1.287672000 | -0.792897000 | 2.635298000  |
| Li | -2.618912000 | 1.036854000  | 0.873596000  |
| Li | -1.835527000 | -0.704974000 | -1.777869000 |

**II-Li<sub>8</sub>**

|   |              |             |             |
|---|--------------|-------------|-------------|
| C | -1.009187000 | 2.622150000 | 0.702268000 |
|---|--------------|-------------|-------------|

|    |              |              |              |
|----|--------------|--------------|--------------|
| C  | -1.146234000 | 1.616552000  | -0.279719000 |
| C  | -0.518969000 | 1.866901000  | -1.526641000 |
| C  | 0.071610000  | 3.107597000  | -1.817958000 |
| C  | 0.126730000  | 4.101813000  | -0.826591000 |
| C  | -0.375127000 | 3.859361000  | 0.440391000  |
| H  | -0.312541000 | -0.626528000 | 1.276218000  |
| H  | 0.431996000  | 3.327988000  | -2.825321000 |
| H  | 0.578184000  | 5.062602000  | -1.056848000 |
| H  | -0.296035000 | 4.606620000  | 1.223852000  |
| S  | -0.398984000 | 0.497559000  | -2.702022000 |
| S  | 3.339233000  | 0.073750000  | -1.628288000 |
| C  | -1.144483000 | -3.011920000 | -1.075659000 |
| C  | -1.753889000 | -2.908487000 | -2.329790000 |
| C  | -3.018932000 | -2.332296000 | -2.431019000 |
| C  | -3.650530000 | -1.785559000 | -1.316917000 |
| C  | -3.068201000 | -1.892780000 | -0.041193000 |
| C  | -1.861636000 | -2.609874000 | 0.061218000  |
| H  | -1.216667000 | -3.225090000 | -3.217819000 |
| H  | -3.484559000 | -2.239357000 | -3.406992000 |
| H  | -4.590345000 | -1.253534000 | -1.422660000 |
| H  | -1.441488000 | -2.759202000 | 1.051798000  |
| S  | -1.556018000 | 2.232905000  | 2.378354000  |
| S  | -3.730015000 | -1.016426000 | 1.358424000  |
| S  | 0.614748000  | -3.348853000 | -0.968458000 |
| S  | 2.157971000  | -3.051671000 | 2.716317000  |
| C  | 2.397666000  | -0.295052000 | 2.859155000  |
| C  | 2.525055000  | 0.967542000  | 2.283294000  |
| C  | 2.774232000  | 1.119222000  | 0.910857000  |
| C  | 2.994596000  | -0.015624000 | 0.109087000  |
| C  | 2.946859000  | -1.278453000 | 0.728840000  |
| C  | 2.588332000  | -1.451206000 | 2.074208000  |
| H  | 2.135763000  | -0.401626000 | 3.906670000  |
| H  | 2.397341000  | 1.852997000  | 2.902800000  |
| H  | 2.853263000  | 2.112316000  | 0.474689000  |
| H  | 3.176048000  | -2.150566000 | 0.121978000  |
| Li | 1.636409000  | -4.422162000 | 0.892650000  |
| Li | 0.334922000  | 1.003974000  | 1.355701000  |
| Li | 1.660735000  | 1.540400000  | -2.249152000 |
| Li | 1.331103000  | -1.217546000 | -2.032390000 |
| Li | -1.717511000 | -0.245944000 | 2.397393000  |
| Li | -3.013394000 | 1.224525000  | 0.706467000  |

|    |              |              |              |
|----|--------------|--------------|--------------|
| Li | -1.280200000 | -0.434292000 | -0.587813000 |
| Li | 0.683007000  | -1.982087000 | 1.105028000  |

**II-Li<sub>9</sub>**

|   |              |              |              |
|---|--------------|--------------|--------------|
| C | -0.850332000 | 2.713706000  | 0.725507000  |
| C | -0.885275000 | 1.637799000  | -0.196291000 |
| C | -0.449583000 | 1.936415000  | -1.513562000 |
| C | -0.030227000 | 3.224884000  | -1.880157000 |
| C | 0.015744000  | 4.247924000  | -0.917918000 |
| C | -0.378819000 | 4.002529000  | 0.383424000  |
| H | -0.330844000 | -0.551031000 | 1.872933000  |
| H | 0.211747000  | 3.449408000  | -2.919349000 |
| H | 0.348522000  | 5.240156000  | -1.208391000 |
| H | -0.348777000 | 4.786411000  | 1.133641000  |
| S | -0.323175000 | 0.640728000  | -2.770810000 |
| S | 3.330436000  | 0.255745000  | -1.465513000 |
| C | -1.091751000 | -2.995452000 | -1.238493000 |
| C | -1.861235000 | -3.197108000 | -2.368942000 |
| C | -3.205524000 | -2.722381000 | -2.428476000 |
| C | -3.715530000 | -1.948132000 | -1.348973000 |
| C | -2.968521000 | -1.747445000 | -0.193569000 |
| C | -1.654381000 | -2.357970000 | -0.059955000 |
| H | -1.414064000 | -3.668882000 | -3.239830000 |
| H | -3.826134000 | -2.939351000 | -3.289017000 |
| H | -4.696445000 | -1.487325000 | -1.427483000 |
| H | -1.422282000 | -2.776679000 | 0.934918000  |
| S | -1.432071000 | 2.432269000  | 2.416715000  |
| S | -3.567950000 | -0.696647000 | 1.140648000  |
| S | 0.672174000  | -3.304365000 | -1.224457000 |
| S | 2.018856000  | -3.147796000 | 2.619319000  |
| C | 2.433630000  | -0.430946000 | 2.991656000  |
| C | 2.644540000  | 0.865553000  | 2.526940000  |
| C | 2.873779000  | 1.124963000  | 1.165812000  |
| C | 2.987835000  | 0.053130000  | 0.264294000  |
| C | 2.847223000  | -1.251748000 | 0.768863000  |
| C | 2.508019000  | -1.522499000 | 2.101598000  |
| H | 2.193005000  | -0.613654000 | 4.033577000  |
| H | 2.606528000  | 1.697261000  | 3.227275000  |
| H | 3.022620000  | 2.143070000  | 0.815923000  |
| H | 2.997631000  | -2.076796000 | 0.079290000  |



|    |              |              |              |
|----|--------------|--------------|--------------|
| Li | 1.627986000  | -4.351527000 | 0.649863000  |
| Li | 0.449238000  | 1.042045000  | 1.670577000  |
| Li | 1.715904000  | 1.735609000  | -2.154831000 |
| Li | 1.353252000  | -1.079235000 | -1.934713000 |
| Li | -1.825535000 | -0.049949000 | 2.709700000  |
| Li | -2.877788000 | 1.557941000  | 0.692391000  |
| Li | -1.968918000 | -0.977115000 | -2.308130000 |
| Li | 0.414840000  | -2.009590000 | 1.160344000  |
| Li | -1.282560000 | -0.318452000 | 0.323642000  |

### **II-Li<sub>10</sub>**

|   |              |              |              |
|---|--------------|--------------|--------------|
| C | -1.403674000 | 2.758747000  | 1.270777000  |
| C | -1.665997000 | 2.053891000  | 0.060364000  |
| C | -0.744995000 | 2.246202000  | -0.985783000 |
| C | 0.319749000  | 3.169305000  | -0.902285000 |
| C | 0.488691000  | 3.904356000  | 0.271402000  |
| C | -0.348668000 | 3.687505000  | 1.370192000  |
| H | -0.360264000 | -0.167463000 | 0.979186000  |
| H | 1.011548000  | 3.294393000  | -1.730633000 |
| H | 1.307648000  | 4.614527000  | 0.347506000  |
| H | -0.177755000 | 4.209759000  | 2.306678000  |
| S | -0.788395000 | 1.154963000  | -2.425554000 |
| S | 3.291409000  | -0.349191000 | -1.829925000 |
| C | -1.006656000 | -3.194518000 | -0.999251000 |
| C | -1.621273000 | -3.263778000 | -2.261818000 |
| C | -2.868706000 | -2.658138000 | -2.453333000 |
| C | -3.497387000 | -1.949227000 | -1.427963000 |
| C | -2.928614000 | -1.914861000 | -0.140405000 |
| C | -1.710757000 | -2.597287000 | 0.050581000  |
| H | -1.120794000 | -3.781186000 | -3.073840000 |
| H | -3.348605000 | -2.727425000 | -3.427366000 |
| H | -4.438841000 | -1.440140000 | -1.605178000 |
| H | -1.311575000 | -2.626868000 | 1.064074000  |
| S | -2.363106000 | 2.333906000  | 2.721808000  |
| S | -3.622770000 | -0.982502000 | 1.187565000  |
| S | 0.686976000  | -3.707779000 | -0.781910000 |
| S | 1.576384000  | -2.385691000 | 2.941743000  |
| C | 2.298807000  | 0.266020000  | 2.617250000  |
| C | 2.662355000  | 1.355624000  | 1.827974000  |
| C | 2.960118000  | 1.204779000  | 0.466303000  |

|    |              |              |              |
|----|--------------|--------------|--------------|
| C  | 2.995168000  | -0.077946000 | -0.104726000 |
| C  | 2.765998000  | -1.175176000 | 0.744922000  |
| C  | 2.324372000  | -1.031619000 | 2.069365000  |
| H  | 1.984061000  | 0.405419000  | 3.646189000  |
| H  | 2.670462000  | 2.351287000  | 2.266299000  |
| H  | 3.189154000  | 2.069983000  | -0.148154000 |
| H  | 2.880042000  | -2.171191000 | 0.327313000  |
| Li | 1.326928000  | -4.147728000 | 1.458162000  |
| Li | 0.502611000  | 1.499643000  | 0.794624000  |
| Li | 1.411653000  | 0.535447000  | -2.967041000 |
| Li | 1.887738000  | -2.233572000 | -2.378847000 |
| Li | -1.704970000 | 0.069330000  | 2.335682000  |
| Li | -3.531778000 | 1.455896000  | 0.845759000  |
| Li | -1.051743000 | -1.100608000 | -3.132363000 |
| Li | 0.553596000  | -1.630762000 | 0.808898000  |
| Li | -1.662491000 | 0.040387000  | -0.368379000 |
| Li | 0.981614000  | -1.629504000 | -5.315877000 |

## II-Li<sub>11</sub>

|   |              |              |              |
|---|--------------|--------------|--------------|
| C | -1.726565000 | 2.844674000  | 1.161757000  |
| C | -1.637699000 | 1.882437000  | 0.116281000  |
| C | -0.532221000 | 1.995597000  | -0.741850000 |
| C | 0.402891000  | 3.043585000  | -0.662225000 |
| C | 0.257328000  | 3.989199000  | 0.354240000  |
| C | -0.782523000 | 3.882545000  | 1.283666000  |
| H | -0.564463000 | 0.009784000  | 1.939295000  |
| H | 1.246167000  | 3.093063000  | -1.343487000 |
| H | 0.982507000  | 4.792452000  | 0.446298000  |
| H | -0.863060000 | 4.592493000  | 2.100983000  |
| S | -0.175744000 | 0.611573000  | -1.857782000 |
| S | 3.387534000  | -0.821027000 | -1.965040000 |
| C | -1.084330000 | -3.058937000 | -1.245818000 |
| C | -1.758031000 | -3.130542000 | -2.476592000 |
| C | -3.029363000 | -2.557215000 | -2.609424000 |
| C | -3.637180000 | -1.895812000 | -1.545685000 |
| C | -3.014480000 | -1.866800000 | -0.282074000 |
| C | -1.755825000 | -2.485014000 | -0.151713000 |
| H | -1.287228000 | -3.638437000 | -3.312926000 |
| H | -3.549135000 | -2.630983000 | -3.562431000 |
| H | -4.612585000 | -1.436372000 | -1.664794000 |

|    |              |              |              |
|----|--------------|--------------|--------------|
| H  | -1.282585000 | -2.497035000 | 0.829386000  |
| S  | -3.020905000 | 2.641673000  | 2.380418000  |
| S  | -3.765481000 | -0.999987000 | 1.071949000  |
| S  | 0.593324000  | -3.613513000 | -1.108630000 |
| S  | 2.236204000  | -2.455677000 | 3.186329000  |
| C  | 2.593349000  | 0.219909000  | 2.483170000  |
| C  | 2.713425000  | 1.279614000  | 1.515734000  |
| C  | 3.022658000  | 0.953074000  | 0.167360000  |
| C  | 3.132465000  | -0.360935000 | -0.248866000 |
| C  | 2.843446000  | -1.423859000 | 0.695607000  |
| C  | 2.667924000  | -1.107443000 | 2.093248000  |
| H  | 2.480879000  | 0.459223000  | 3.540875000  |
| H  | 2.845848000  | 2.303757000  | 1.858688000  |
| H  | 3.191288000  | 1.750811000  | -0.551804000 |
| H  | 3.285721000  | -2.397804000 | 0.451513000  |
| Li | 1.543677000  | -3.256484000 | 1.086992000  |
| Li | 0.447136000  | 1.684686000  | 1.321059000  |
| Li | 1.774494000  | 0.364941000  | -3.192155000 |
| Li | 1.946631000  | -2.585673000 | -2.844798000 |
| Li | -2.292506000 | 0.400666000  | 2.509277000  |
| Li | -3.675978000 | 1.372237000  | 0.470063000  |
| Li | -1.157114000 | -0.999098000 | -3.267840000 |
| Li | 0.604465000  | -0.902310000 | 2.862717000  |
| Li | -1.526401000 | -0.176564000 | 0.143712000  |
| Li | 0.840418000  | -1.498650000 | -5.617376000 |
| Li | 1.222329000  | -1.090904000 | -0.758266000 |

### **II-Li<sub>12</sub>**

|   |              |              |              |
|---|--------------|--------------|--------------|
| C | -1.995817000 | 2.786027000  | 1.132129000  |
| C | -1.779532000 | 1.854194000  | 0.073925000  |
| C | -0.571922000 | 1.985872000  | -0.636190000 |
| C | 0.394247000  | 2.962409000  | -0.338205000 |
| C | 0.142769000  | 3.856513000  | 0.707297000  |
| C | -1.041115000 | 3.775398000  | 1.442861000  |
| H | -0.002783000 | -0.425512000 | 1.066456000  |
| H | 1.326118000  | 3.012461000  | -0.892519000 |
| H | 0.884853000  | 4.608745000  | 0.959924000  |
| H | -1.219810000 | 4.451718000  | 2.273147000  |
| S | -0.138518000 | 0.728156000  | -1.865678000 |
| S | 3.555177000  | -0.823573000 | -2.114693000 |

|               |              |              |              |
|---------------|--------------|--------------|--------------|
| C             | -1.092369000 | -2.997526000 | -1.240905000 |
| C             | -1.699150000 | -3.107827000 | -2.500890000 |
| C             | -2.995533000 | -2.604947000 | -2.686290000 |
| C             | -3.681112000 | -1.976035000 | -1.651835000 |
| C             | -3.116217000 | -1.911220000 | -0.360181000 |
| C             | -1.844462000 | -2.481919000 | -0.176093000 |
| H             | -1.162089000 | -3.575634000 | -3.320132000 |
| H             | -3.466783000 | -2.700777000 | -3.661861000 |
| H             | -4.668404000 | -1.557421000 | -1.816617000 |
| H             | -1.405975000 | -2.445157000 | 0.818534000  |
| S             | -3.471760000 | 2.626186000  | 2.129603000  |
| S             | -3.923809000 | -1.044475000 | 0.951245000  |
| S             | 0.632200000  | -3.364844000 | -1.014661000 |
| S             | 2.180132000  | -2.500755000 | 2.968552000  |
| C             | 2.831242000  | 0.109935000  | 2.331117000  |
| C             | 3.098148000  | 1.137360000  | 1.424556000  |
| C             | 3.314786000  | 0.868710000  | 0.075838000  |
| C             | 3.343901000  | -0.460467000 | -0.385630000 |
| C             | 3.124814000  | -1.487572000 | 0.547594000  |
| C             | 2.788304000  | -1.224698000 | 1.889849000  |
| H             | 2.642394000  | 0.334857000  | 3.377008000  |
| H             | 3.123931000  | 2.166313000  | 1.776857000  |
| H             | 3.494106000  | 1.676368000  | -0.627007000 |
| H             | 3.197137000  | -2.517212000 | 0.204581000  |
| Li            | 1.161570000  | -3.649320000 | 1.256151000  |
| Li            | 0.032459000  | 1.539502000  | 1.591427000  |
| Li            | 1.837892000  | 0.442755000  | -3.137570000 |
| Li            | 1.915820000  | -2.418683000 | -2.822923000 |
| Li            | -2.687649000 | 0.412359000  | 2.652278000  |
| Li            | -3.814257000 | 1.273449000  | 0.251302000  |
| Li            | -1.104282000 | -0.938924000 | -3.203455000 |
| Li            | 0.376113000  | -0.887546000 | 2.834730000  |
| Li            | -1.560495000 | -0.204086000 | 0.061030000  |
| Li            | 0.857331000  | -1.390437000 | -5.585921000 |
| Li            | 1.047713000  | -0.863917000 | -0.363834000 |
| Li            | -0.671725000 | 1.176313000  | 4.743002000  |
| <b>III-Li</b> |              |              |              |
| C             | 0.546104000  | 2.285957000  | 0.889996000  |
| C             | 1.870201000  | 1.968193000  | 0.589439000  |

|                           |              |              |              |
|---------------------------|--------------|--------------|--------------|
| C                         | 2.564488000  | 1.004887000  | 1.339764000  |
| C                         | 1.874420000  | 0.341467000  | 2.374710000  |
| C                         | 0.551673000  | 0.663253000  | 2.661810000  |
| C                         | -0.122774000 | 1.637970000  | 1.930132000  |
| H                         | 2.382267000  | 2.457453000  | -0.234544000 |
| H                         | 2.402522000  | -0.394373000 | 2.976728000  |
| H                         | 0.036659000  | 0.155782000  | 3.471801000  |
| H                         | -1.150866000 | 1.892579000  | 2.165409000  |
| S                         | 4.244511000  | 0.610736000  | 0.959390000  |
| S                         | 1.597329000  | -0.311931000 | -1.957378000 |
| C                         | -3.087855000 | -0.615080000 | -0.582999000 |
| C                         | -2.669250000 | -0.835819000 | -1.892691000 |
| C                         | -2.131754000 | 0.217910000  | -2.635121000 |
| C                         | -1.986522000 | 1.474910000  | -2.063211000 |
| C                         | -2.411270000 | 1.691256000  | -0.747463000 |
| C                         | -2.979406000 | 0.656524000  | -0.012660000 |
| H                         | -2.728697000 | -1.834596000 | -2.312874000 |
| H                         | -1.795481000 | 0.045481000  | -3.652239000 |
| H                         | -1.525740000 | 2.286173000  | -2.617624000 |
| H                         | -3.279313000 | 0.816348000  | 1.018888000  |
| S                         | -0.177215000 | 3.566471000  | -0.131017000 |
| S                         | -2.217400000 | 3.279148000  | 0.053633000  |
| S                         | -3.570621000 | -2.010351000 | 0.419069000  |
| S                         | -2.002990000 | -1.976707000 | 1.811959000  |
| C                         | -0.036600000 | -3.620890000 | 0.772009000  |
| C                         | 1.058877000  | -3.893525000 | -0.044616000 |
| C                         | 1.566666000  | -2.912443000 | -0.896382000 |
| C                         | 0.998574000  | -1.630150000 | -0.898915000 |
| C                         | -0.072933000 | -1.340272000 | -0.050414000 |
| C                         | -0.607210000 | -2.346786000 | 0.760559000  |
| H                         | -0.454502000 | -4.388184000 | 1.414955000  |
| H                         | 1.501445000  | -4.884494000 | -0.044477000 |
| H                         | 2.395957000  | -3.132471000 | -1.563738000 |
| H                         | -0.468580000 | -0.328333000 | -0.012569000 |
| S                         | 3.630963000  | -0.498406000 | -1.821931000 |
| Li                        | 3.019508000  | -1.239630000 | 0.362329000  |
| <b>III-Li<sub>2</sub></b> |              |              |              |
| C                         | 2.288469000  | 1.974386000  | -0.445729000 |
| C                         | 1.120512000  | 2.358589000  | 0.222082000  |

|    |              |              |              |
|----|--------------|--------------|--------------|
| C  | -0.068474000 | 2.609932000  | -0.491607000 |
| C  | -0.044223000 | 2.426594000  | -1.888312000 |
| C  | 1.123230000  | 2.048193000  | -2.540146000 |
| C  | 2.301367000  | 1.826902000  | -1.830124000 |
| H  | 1.135223000  | 2.473185000  | 1.303744000  |
| H  | -0.961691000 | 2.586837000  | -2.445606000 |
| H  | 1.116224000  | 1.922401000  | -3.618456000 |
| H  | 3.211956000  | 1.526425000  | -2.337540000 |
| S  | -1.600462000 | 2.994124000  | 0.306309000  |
| S  | -3.117539000 | -0.016314000 | 2.383309000  |
| C  | 0.930760000  | -2.475901000 | -0.074351000 |
| C  | 0.768310000  | -2.778544000 | 1.275982000  |
| C  | 1.673045000  | -2.281451000 | 2.215323000  |
| C  | 2.736684000  | -1.489385000 | 1.809016000  |
| C  | 2.896004000  | -1.184127000 | 0.452285000  |
| C  | 1.993621000  | -1.668462000 | -0.493850000 |
| H  | -0.074730000 | -3.383498000 | 1.596576000  |
| H  | 1.528196000  | -2.504482000 | 3.266793000  |
| H  | 3.446528000  | -1.097206000 | 2.530007000  |
| H  | 2.123939000  | -1.427418000 | -1.545146000 |
| S  | 3.745340000  | 1.682365000  | 0.546661000  |
| S  | 4.289065000  | -0.219546000 | -0.110682000 |
| S  | -0.200265000 | -3.242641000 | -1.236586000 |
| S  | -0.865057000 | -1.682346000 | -2.411707000 |
| C  | -3.188092000 | -0.270091000 | -2.189710000 |
| C  | -4.195582000 | 0.397136000  | -1.496686000 |
| C  | -4.202484000 | 0.441834000  | -0.107294000 |
| C  | -3.196860000 | -0.212791000 | 0.604631000  |
| C  | -2.222865000 | -0.947254000 | -0.076763000 |
| C  | -2.199170000 | -0.944337000 | -1.473244000 |
| H  | -3.174431000 | -0.273478000 | -3.274890000 |
| H  | -4.968769000 | 0.918948000  | -2.051004000 |
| H  | -4.953735000 | 1.019896000  | 0.420785000  |
| H  | -1.479931000 | -1.502879000 | 0.490296000  |
| S  | -1.037870000 | -0.007522000 | 2.774101000  |
| Li | -0.686280000 | 0.715085000  | 0.467673000  |
| Li | -1.795614000 | 2.159580000  | 2.469972000  |

### III-Li<sub>3</sub>

|   |              |             |             |
|---|--------------|-------------|-------------|
| C | -2.682651000 | 1.773572000 | 0.542226000 |
|---|--------------|-------------|-------------|

|    |              |              |              |
|----|--------------|--------------|--------------|
| C  | -1.852010000 | 1.518613000  | -0.556275000 |
| C  | -0.506995000 | 1.953018000  | -0.575639000 |
| C  | -0.046005000 | 2.689717000  | 0.536990000  |
| C  | -0.879363000 | 2.946865000  | 1.629141000  |
| C  | -2.196727000 | 2.482868000  | 1.652188000  |
| H  | -2.238031000 | 0.965181000  | -1.407638000 |
| H  | 0.979004000  | 3.047432000  | 0.542586000  |
| H  | -0.485566000 | 3.490955000  | 2.481411000  |
| H  | -2.841257000 | 2.660321000  | 2.505968000  |
| S  | 0.507565000  | 1.592352000  | -1.968112000 |
| S  | 4.049271000  | 0.722764000  | -1.348577000 |
| C  | -1.008700000 | -2.156671000 | -1.209865000 |
| C  | -1.559943000 | -2.120700000 | -2.497138000 |
| C  | -2.890618000 | -1.759391000 | -2.697503000 |
| C  | -3.709570000 | -1.411168000 | -1.627444000 |
| C  | -3.165434000 | -1.417693000 | -0.344035000 |
| C  | -1.840152000 | -1.799630000 | -0.136969000 |
| H  | -0.933521000 | -2.382050000 | -3.343893000 |
| H  | -3.292365000 | -1.747108000 | -3.705803000 |
| H  | -4.739698000 | -1.108567000 | -1.783033000 |
| H  | -1.458649000 | -1.813471000 | 0.882689000  |
| S  | -4.368126000 | 1.177333000  | 0.517567000  |
| S  | -4.084806000 | -0.825179000 | 1.069138000  |
| S  | 0.693683000  | -2.619037000 | -0.968249000 |
| S  | 0.608385000  | -0.653330000 | 2.802603000  |
| C  | 3.019960000  | -1.855887000 | 2.271749000  |
| C  | 4.155202000  | -2.114187000 | 1.497285000  |
| C  | 4.476814000  | -1.304191000 | 0.419822000  |
| C  | 3.670365000  | -0.189996000 | 0.145790000  |
| C  | 2.549531000  | 0.087084000  | 0.924408000  |
| C  | 2.179488000  | -0.767978000 | 1.979292000  |
| H  | 2.781042000  | -2.492767000 | 3.120713000  |
| H  | 4.787516000  | -2.961748000 | 1.742521000  |
| H  | 5.345158000  | -1.514931000 | -0.196108000 |
| H  | 1.949912000  | 0.965821000  | 0.700678000  |
| S  | 3.144630000  | 2.530019000  | -1.178876000 |
| Li | 0.897986000  | -2.507505000 | 1.341617000  |
| Li | -0.792469000 | 0.571891000  | 1.390257000  |
| Li | 1.580369000  | -0.475483000 | -1.422586000 |

**III-Li<sub>4</sub>**

|    |              |              |              |
|----|--------------|--------------|--------------|
| C  | 2.487830000  | 2.073399000  | -0.300294000 |
| C  | 1.743655000  | 1.519515000  | 0.749607000  |
| C  | 0.354191000  | 1.741577000  | 0.858675000  |
| C  | -0.249786000 | 2.583581000  | -0.098775000 |
| C  | 0.497074000  | 3.144106000  | -1.139295000 |
| C  | 1.863875000  | 2.882503000  | -1.262615000 |
| H  | 2.234684000  | 0.897281000  | 1.492258000  |
| H  | -1.317089000 | 2.785319000  | -0.036616000 |
| H  | -0.002179000 | 3.768451000  | -1.873148000 |
| H  | 2.443868000  | 3.295119000  | -2.080869000 |
| S  | -0.531655000 | 0.952024000  | 2.172278000  |
| S  | -4.471716000 | 0.608826000  | 1.096538000  |
| C  | 1.516952000  | -2.270011000 | 0.926314000  |
| C  | 2.123660000  | -2.339033000 | 2.186353000  |
| C  | 3.398421000  | -1.817456000 | 2.398154000  |
| C  | 4.101903000  | -1.199386000 | 1.368343000  |
| C  | 3.497068000  | -1.100329000 | 0.115945000  |
| C  | 2.230969000  | -1.641366000 | -0.105098000 |
| H  | 1.584109000  | -2.808716000 | 3.002154000  |
| H  | 3.847310000  | -1.893614000 | 3.383510000  |
| H  | 5.085525000  | -0.773152000 | 1.535083000  |
| H  | 1.801154000  | -1.559800000 | -1.102005000 |
| S  | 4.243134000  | 1.746592000  | -0.399157000 |
| S  | 4.244074000  | -0.180929000 | -1.220979000 |
| S  | -0.107774000 | -2.948303000 | 0.666080000  |
| S  | -0.578053000 | -0.585658000 | -2.752613000 |
| C  | -2.636483000 | -2.240268000 | -1.970687000 |
| C  | -3.667327000 | -2.649450000 | -1.121135000 |
| C  | -4.174341000 | -1.790885000 | -0.157944000 |
| C  | -3.675331000 | -0.478685000 | -0.074696000 |
| C  | -2.611083000 | -0.082112000 | -0.889739000 |
| C  | -2.049626000 | -0.970054000 | -1.829613000 |
| H  | -2.304548000 | -2.898608000 | -2.773855000 |
| H  | -4.090326000 | -3.642907000 | -1.232402000 |
| H  | -4.993206000 | -2.099615000 | 0.483778000  |
| H  | -2.258022000 | 0.943874000  | -0.831833000 |
| S  | -4.019353000 | 2.561411000  | 0.515010000  |
| Li | -0.382208000 | -2.620351000 | -1.596577000 |
| Li | 0.719228000  | 0.767196000  | -1.335235000 |
| Li | -1.354051000 | -0.979221000 | 1.041769000  |



|                           |              |              |              |
|---------------------------|--------------|--------------|--------------|
| Li                        | -2.649468000 | 1.942071000  | 2.182853000  |
| <b>III-Li<sub>5</sub></b> |              |              |              |
| C                         | 2.607503000  | 2.480384000  | -0.238956000 |
| C                         | 1.883077000  | 1.949179000  | 0.842612000  |
| C                         | 0.483645000  | 1.891043000  | 0.856157000  |
| C                         | -0.220845000 | 2.511724000  | -0.186758000 |
| C                         | 0.482920000  | 3.108172000  | -1.237182000 |
| C                         | 1.876972000  | 3.068739000  | -1.291146000 |
| H                         | 2.469257000  | 1.596713000  | 1.692665000  |
| H                         | -1.306443000 | 2.546400000  | -0.170677000 |
| H                         | -0.073346000 | 3.585724000  | -2.038217000 |
| H                         | 2.416234000  | 3.493525000  | -2.131762000 |
| S                         | -0.302584000 | 0.947493000  | 2.163363000  |
| S                         | -4.225301000 | 0.378837000  | 1.245362000  |
| C                         | 1.276299000  | -2.430788000 | 1.075837000  |
| C                         | 2.023175000  | -2.510420000 | 2.268315000  |
| C                         | 3.282051000  | -1.892637000 | 2.341158000  |
| C                         | 3.825623000  | -1.183895000 | 1.263559000  |
| C                         | 3.118553000  | -1.118976000 | 0.042415000  |
| C                         | 1.859497000  | -1.748037000 | -0.003336000 |
| H                         | 1.609817000  | -3.028074000 | 3.126814000  |
| H                         | 3.839037000  | -1.943722000 | 3.272065000  |
| H                         | 4.782627000  | -0.681345000 | 1.353005000  |
| H                         | 1.316736000  | -1.670803000 | -0.938583000 |
| S                         | 4.337629000  | 2.249744000  | -0.313144000 |
| S                         | 3.685393000  | -0.273654000 | -1.386001000 |
| S                         | -0.373516000 | -3.076400000 | 0.938442000  |
| S                         | -0.422078000 | -0.753679000 | -2.709357000 |
| C                         | -2.648555000 | -2.251251000 | -2.145917000 |
| C                         | -3.729094000 | -2.649871000 | -1.356030000 |
| C                         | -4.182459000 | -1.849998000 | -0.317416000 |
| C                         | -3.575721000 | -0.601923000 | -0.104704000 |
| C                         | -2.483988000 | -0.203600000 | -0.882806000 |
| C                         | -1.963485000 | -1.045993000 | -1.886659000 |
| H                         | -2.332973000 | -2.865516000 | -2.988125000 |
| H                         | -4.227336000 | -3.591031000 | -1.567350000 |
| H                         | -5.027864000 | -2.151339000 | 0.291764000  |
| H                         | -2.040141000 | 0.773771000  | -0.723124000 |
| S                         | -3.915890000 | 2.380595000  | 0.734560000  |

|    |              |              |              |
|----|--------------|--------------|--------------|
| Li | -0.538594000 | -2.777876000 | -1.405336000 |
| Li | 1.352784000  | 0.672064000  | -1.695517000 |
| Li | -1.480732000 | -0.960514000 | 1.104142000  |
| Li | -2.452084000 | 1.885237000  | 2.344782000  |
| Li | 1.678941000  | -0.317084000 | 1.842887000  |

### III-Li<sub>6</sub>

|   |              |              |              |
|---|--------------|--------------|--------------|
| C | 2.839127000  | 2.767156000  | 0.441429000  |
| C | 1.936608000  | 2.039476000  | 1.251834000  |
| C | 0.634220000  | 1.733409000  | 0.847484000  |
| C | 0.176782000  | 2.203084000  | -0.400357000 |
| C | 1.032792000  | 2.983364000  | -1.184884000 |
| C | 2.338616000  | 3.255820000  | -0.784029000 |
| H | 2.281508000  | 1.755519000  | 2.247998000  |
| H | -0.861239000 | 2.071506000  | -0.686299000 |
| H | 0.657637000  | 3.401535000  | -2.116197000 |
| H | 2.982036000  | 3.874470000  | -1.403415000 |
| S | -0.376667000 | 0.737626000  | 1.952062000  |
| S | -4.363276000 | 0.773659000  | 0.907682000  |
| C | 1.311987000  | -2.511009000 | 0.959095000  |
| C | 2.115161000  | -2.522795000 | 2.117551000  |
| C | 3.349370000  | -1.858676000 | 2.110896000  |
| C | 3.804722000  | -1.148133000 | 0.991995000  |
| C | 3.030290000  | -1.133726000 | -0.186166000 |
| C | 1.816704000  | -1.840488000 | -0.164119000 |
| H | 1.763423000  | -3.028209000 | 3.010034000  |
| H | 3.955339000  | -1.861734000 | 3.011858000  |
| H | 4.740301000  | -0.600185000 | 1.042255000  |
| H | 1.232782000  | -1.829533000 | -1.077399000 |
| S | 4.509088000  | 2.983891000  | 0.933602000  |
| S | 3.427033000  | -0.247430000 | -1.662669000 |
| S | -0.311273000 | -3.226277000 | 0.908046000  |
| S | -0.646209000 | -1.113891000 | -2.812066000 |
| C | -2.819583000 | -2.519536000 | -1.862997000 |
| C | -3.864869000 | -2.754744000 | -0.965591000 |
| C | -4.291188000 | -1.764295000 | -0.092828000 |
| C | -3.700859000 | -0.488993000 | -0.163579000 |
| C | -2.635636000 | -0.261065000 | -1.039039000 |
| C | -2.139080000 | -1.285356000 | -1.871004000 |
| H | -2.549231000 | -3.285222000 | -2.590841000 |

|    |              |              |              |
|----|--------------|--------------|--------------|
| H  | -4.358450000 | -3.721722000 | -0.962051000 |
| H  | -5.110637000 | -1.945389000 | 0.595307000  |
| H  | -2.219028000 | 0.737331000  | -1.102929000 |
| S  | -3.645936000 | 2.597436000  | 0.191008000  |
| Li | -0.619109000 | -3.055470000 | -1.429203000 |
| Li | 1.064170000  | 0.430093000  | -1.872781000 |
| Li | -1.468520000 | -1.120173000 | 0.835521000  |
| Li | -2.368353000 | 1.988408000  | 1.924166000  |
| Li | 1.724718000  | -0.293744000 | 1.651219000  |
| Li | 4.611232000  | 1.585316000  | -0.832815000 |

### III-Li<sub>7</sub>

|   |              |              |              |
|---|--------------|--------------|--------------|
| C | 2.571700000  | 2.738441000  | -0.097661000 |
| C | 1.854645000  | 2.152874000  | 0.966424000  |
| C | 0.532166000  | 1.700373000  | 0.837490000  |
| C | -0.120951000 | 1.857483000  | -0.398420000 |
| C | 0.555872000  | 2.485205000  | -1.451041000 |
| C | 1.880060000  | 2.900787000  | -1.317890000 |
| H | 2.346724000  | 2.108502000  | 1.939114000  |
| H | -1.153952000 | 1.551364000  | -0.530105000 |
| H | 0.030363000  | 2.649538000  | -2.388848000 |
| H | 2.386858000  | 3.387511000  | -2.145446000 |
| S | -0.234490000 | 0.947750000  | 2.275209000  |
| S | -3.670056000 | -0.766394000 | 1.823533000  |
| C | 1.503670000  | -2.429516000 | 1.421535000  |
| C | 2.280208000  | -2.203369000 | 2.576484000  |
| C | 3.481647000  | -1.492172000 | 2.478675000  |
| C | 3.928658000  | -0.964662000 | 1.259474000  |
| C | 3.186938000  | -1.195495000 | 0.083850000  |
| C | 2.003773000  | -1.947488000 | 0.202572000  |
| H | 1.930837000  | -2.566893000 | 3.536644000  |
| H | 4.064087000  | -1.310203000 | 3.376817000  |
| H | 4.840301000  | -0.376973000 | 1.226149000  |
| H | 1.457766000  | -2.139499000 | -0.714162000 |
| S | 4.238934000  | 3.248699000  | 0.117728000  |
| S | 3.601670000  | -0.572813000 | -1.517993000 |
| S | -0.079804000 | -3.226270000 | 1.495098000  |
| S | -0.378153000 | -1.315443000 | -2.599696000 |
| C | -3.144828000 | -1.485583000 | -2.699303000 |
| C | -4.396913000 | -1.557555000 | -2.110684000 |

|    |              |              |              |
|----|--------------|--------------|--------------|
| C  | -4.564969000 | -1.365058000 | -0.732417000 |
| C  | -3.461048000 | -1.046947000 | 0.072466000  |
| C  | -2.205041000 | -0.919852000 | -0.552065000 |
| C  | -2.009744000 | -1.182627000 | -1.918291000 |
| H  | -3.016557000 | -1.674547000 | -3.759414000 |
| H  | -5.261337000 | -1.803668000 | -2.719972000 |
| H  | -5.536665000 | -1.527435000 | -0.269653000 |
| H  | -1.340887000 | -0.603598000 | 0.031752000  |
| S  | -3.660370000 | 2.853763000  | 0.345564000  |
| Li | -0.729663000 | -2.818474000 | -0.774519000 |
| Li | 1.295938000  | 0.239978000  | -1.742161000 |
| Li | -1.314267000 | -1.302944000 | 2.171864000  |
| Li | -2.534537000 | 1.490333000  | 1.898056000  |
| Li | 1.804103000  | -0.097798000 | 1.731597000  |
| Li | 4.737196000  | 1.406347000  | -1.062275000 |
| Li | -4.748542000 | 0.829816000  | 0.318621000  |

### III-Li<sub>8</sub>

|   |              |              |              |
|---|--------------|--------------|--------------|
| C | 2.452796000  | 2.912576000  | -0.228850000 |
| C | 1.827017000  | 2.273613000  | 0.864461000  |
| C | 0.565612000  | 1.665232000  | 0.777032000  |
| C | -0.115762000 | 1.705983000  | -0.460184000 |
| C | 0.464090000  | 2.393163000  | -1.543397000 |
| C | 1.723234000  | 2.981917000  | -1.438488000 |
| H | 2.347805000  | 2.290736000  | 1.821070000  |
| H | -1.102741000 | 1.266080000  | -0.564220000 |
| H | -0.083970000 | 2.444240000  | -2.483325000 |
| H | 2.163573000  | 3.497941000  | -2.285699000 |
| S | -0.105105000 | 0.888213000  | 2.244572000  |
| S | -3.628030000 | -0.743041000 | 1.815027000  |
| C | 1.544190000  | -2.486880000 | 1.471099000  |
| C | 2.344629000  | -2.350601000 | 2.625515000  |
| C | 3.557647000  | -1.656767000 | 2.555328000  |
| C | 3.992468000  | -1.053348000 | 1.366696000  |
| C | 3.223992000  | -1.187499000 | 0.192264000  |
| C | 2.029716000  | -1.925609000 | 0.280229000  |
| H | 2.005417000  | -2.774846000 | 3.564160000  |
| H | 4.161391000  | -1.553695000 | 3.451979000  |
| H | 4.923047000  | -0.495382000 | 1.350367000  |
| H | 1.454015000  | -2.046391000 | -0.630651000 |

|    |              |              |              |
|----|--------------|--------------|--------------|
| S  | 4.067462000  | 3.581372000  | -0.079956000 |
| S  | 3.637253000  | -0.462283000 | -1.366109000 |
| S  | -0.043624000 | -3.269012000 | 1.524633000  |
| S  | -0.339855000 | -1.442787000 | -2.587853000 |
| C  | -3.116277000 | -1.391549000 | -2.721410000 |
| C  | -4.377740000 | -1.350125000 | -2.146198000 |
| C  | -4.546840000 | -1.168403000 | -0.767926000 |
| C  | -3.431092000 | -0.986189000 | 0.061465000  |
| C  | -2.161624000 | -0.982785000 | -0.548002000 |
| C  | -1.972883000 | -1.216478000 | -1.918913000 |
| H  | -2.993547000 | -1.565678000 | -3.784657000 |
| H  | -5.254300000 | -1.490533000 | -2.771861000 |
| H  | -5.538637000 | -1.221361000 | -0.324619000 |
| H  | -1.279458000 | -0.762976000 | 0.052396000  |
| S  | -3.363720000 | 3.041525000  | 0.711059000  |
| Li | -0.742856000 | -2.911954000 | -0.751577000 |
| Li | 1.302273000  | 0.126619000  | -1.773211000 |
| Li | -1.319915000 | -1.334425000 | 2.157548000  |
| Li | -2.504552000 | 1.518982000  | 2.124838000  |
| Li | 1.906515000  | -0.197315000 | 1.917841000  |
| Li | 4.687454000  | 1.558195000  | -0.859344000 |
| Li | -4.440623000 | 1.153607000  | 0.321402000  |
| Li | -1.387679000 | 3.602800000  | 0.036480000  |

### III-Li<sub>9</sub>

|   |              |              |              |
|---|--------------|--------------|--------------|
| C | 2.503742000  | 2.820212000  | -0.175557000 |
| C | 1.816914000  | 2.236246000  | 0.914471000  |
| C | 0.557970000  | 1.627569000  | 0.782826000  |
| C | -0.064142000 | 1.629485000  | -0.483151000 |
| C | 0.561636000  | 2.291399000  | -1.558295000 |
| C | 1.828164000  | 2.859989000  | -1.416627000 |
| H | 2.285905000  | 2.294968000  | 1.896157000  |
| H | -1.044855000 | 1.183626000  | -0.627761000 |
| H | 0.041056000  | 2.334540000  | -2.515299000 |
| H | 2.306772000  | 3.350423000  | -2.258383000 |
| S | -0.172966000 | 0.889565000  | 2.244657000  |
| S | -3.631784000 | -0.807109000 | 1.801906000  |
| C | 1.573344000  | -2.455126000 | 1.493933000  |
| C | 2.348007000  | -2.235415000 | 2.652199000  |
| C | 3.546854000  | -1.519661000 | 2.563414000  |

|    |              |              |              |
|----|--------------|--------------|--------------|
| C  | 3.991282000  | -0.976017000 | 1.349750000  |
| C  | 3.247512000  | -1.192476000 | 0.172369000  |
| C  | 2.068123000  | -1.952172000 | 0.280912000  |
| H  | 2.000383000  | -2.612746000 | 3.607635000  |
| H  | 4.130487000  | -1.349164000 | 3.463020000  |
| H  | 4.907526000  | -0.395372000 | 1.319404000  |
| H  | 1.514861000  | -2.139777000 | -0.632585000 |
| S  | 4.124935000  | 3.452969000  | 0.025209000  |
| S  | 3.667940000  | -0.540614000 | -1.416809000 |
| S  | 0.003080000  | -3.274070000 | 1.562081000  |
| S  | -0.330360000 | -1.540528000 | -2.586917000 |
| C  | -3.104267000 | -1.480912000 | -2.729752000 |
| C  | -4.366820000 | -1.446411000 | -2.159011000 |
| C  | -4.539263000 | -1.268377000 | -0.779299000 |
| C  | -3.425563000 | -1.075592000 | 0.048984000  |
| C  | -2.155050000 | -1.061166000 | -0.555430000 |
| C  | -1.962059000 | -1.301171000 | -1.924679000 |
| H  | -2.977918000 | -1.650763000 | -3.793109000 |
| H  | -5.241222000 | -1.589866000 | -2.786668000 |
| H  | -5.531471000 | -1.337389000 | -0.337572000 |
| H  | -1.276018000 | -0.831727000 | 0.045882000  |
| S  | -3.446906000 | 2.921385000  | 0.517506000  |
| Li | -0.694952000 | -2.975193000 | -0.722630000 |
| Li | 1.330532000  | 0.033315000  | -1.826601000 |
| Li | -1.295837000 | -1.364483000 | 2.176006000  |
| Li | -2.521220000 | 1.431947000  | 1.988540000  |
| Li | 1.882347000  | -0.117987000 | 1.811176000  |
| Li | 4.695752000  | 1.502679000  | -0.953694000 |
| Li | -4.558316000 | 0.953861000  | 0.342796000  |
| Li | -1.366180000 | 3.522280000  | -0.133175000 |
| Li | -3.662840000 | 3.139273000  | -1.733358000 |

### III-Li<sub>10</sub>

|   |              |             |              |
|---|--------------|-------------|--------------|
| C | 1.679754000  | 2.854125000 | -0.294031000 |
| C | 0.876804000  | 2.807318000 | 0.962511000  |
| C | 0.083057000  | 1.564775000 | 0.978198000  |
| C | -0.582939000 | 1.216790000 | -0.179423000 |
| C | -0.375076000 | 2.050632000 | -1.400992000 |
| C | 1.027719000  | 2.549208000 | -1.468226000 |
| H | 1.462051000  | 2.980910000 | 1.872075000  |

|    |              |              |              |
|----|--------------|--------------|--------------|
| H  | -1.189515000 | 0.314106000  | -0.219487000 |
| H  | -0.771451000 | 1.624839000  | -2.329741000 |
| H  | 1.489457000  | 2.754119000  | -2.438924000 |
| S  | 0.002824000  | 0.683843000  | 2.533792000  |
| S  | -3.625596000 | -0.597156000 | 1.352206000  |
| C  | 1.517361000  | -2.304176000 | 1.708394000  |
| C  | 2.613603000  | -1.983065000 | 2.522058000  |
| C  | 3.692097000  | -1.276913000 | 1.997820000  |
| C  | 3.738777000  | -0.911027000 | 0.646288000  |
| C  | 2.662275000  | -1.242459000 | -0.187830000 |
| C  | 1.552313000  | -1.888367000 | 0.369626000  |
| H  | 2.601423000  | -2.275085000 | 3.566491000  |
| H  | 4.531731000  | -1.026974000 | 2.640089000  |
| H  | 4.614449000  | -0.415009000 | 0.238356000  |
| H  | 0.669087000  | -2.063494000 | -0.242995000 |
| S  | 3.450859000  | 3.056616000  | -0.108360000 |
| S  | 2.699659000  | -0.882580000 | -1.952500000 |
| S  | 0.121956000  | -3.203383000 | 2.349824000  |
| S  | -0.659634000 | -3.885281000 | -1.936495000 |
| C  | -1.901686000 | -1.549314000 | -2.792027000 |
| C  | -2.756457000 | -0.458693000 | -2.631639000 |
| C  | -3.355043000 | -0.186656000 | -1.405821000 |
| C  | -3.102909000 | -1.012797000 | -0.300571000 |
| C  | -2.307874000 | -2.151133000 | -0.496669000 |
| C  | -1.682517000 | -2.429395000 | -1.721403000 |
| H  | -1.455773000 | -1.755865000 | -3.761045000 |
| H  | -2.951422000 | 0.193921000  | -3.478163000 |
| H  | -3.993815000 | 0.686952000  | -1.298617000 |
| H  | -2.180653000 | -2.830923000 | 0.341852000  |
| S  | -3.149623000 | 3.398838000  | 1.190491000  |
| Li | -0.240288000 | -4.313726000 | 0.345942000  |
| Li | 0.810115000  | 0.366459000  | -1.373257000 |
| Li | -1.321281000 | -1.275217000 | 2.227249000  |
| Li | -2.071418000 | 1.403479000  | 1.668263000  |
| Li | 2.380277000  | 1.237234000  | 1.354103000  |
| Li | 3.202913000  | 1.503658000  | -1.699438000 |
| Li | -4.570041000 | 1.661455000  | 1.214490000  |
| Li | -0.891485000 | 3.940586000  | 1.497931000  |
| Li | -2.108245000 | 3.075653000  | -0.797792000 |
| Li | 1.246293000  | -2.676945000 | -2.511967000 |

**III-Li<sub>11</sub>**

|    |              |              |              |
|----|--------------|--------------|--------------|
| C  | 2.034477000  | 3.009028000  | -0.014741000 |
| C  | 1.191770000  | 2.851847000  | 1.204151000  |
| C  | 0.314883000  | 1.680364000  | 1.069683000  |
| C  | -0.304523000 | 1.488160000  | -0.150077000 |
| C  | -0.026067000 | 2.459802000  | -1.252527000 |
| C  | 1.413130000  | 2.861231000  | -1.231863000 |
| H  | 1.746463000  | 2.903674000  | 2.147326000  |
| H  | -0.984703000 | 0.642383000  | -0.287591000 |
| H  | -0.400409000 | 2.159175000  | -2.240212000 |
| H  | 1.924269000  | 3.131065000  | -2.161090000 |
| S  | 0.029648000  | 0.739898000  | 2.567479000  |
| S  | -3.454537000 | -0.336553000 | 0.921997000  |
| C  | 1.506607000  | -2.275832000 | 1.614218000  |
| C  | 2.514244000  | -2.004402000 | 2.550021000  |
| C  | 3.646479000  | -1.292177000 | 2.165259000  |
| C  | 3.823905000  | -0.858799000 | 0.843838000  |
| C  | 2.834365000  | -1.136138000 | -0.111807000 |
| C  | 1.680451000  | -1.812506000 | 0.304241000  |
| H  | 2.395017000  | -2.341731000 | 3.573643000  |
| H  | 4.423281000  | -1.087367000 | 2.896759000  |
| H  | 4.738894000  | -0.352374000 | 0.548862000  |
| H  | 0.879561000  | -1.967998000 | -0.415455000 |
| S  | 3.803069000  | 3.109077000  | 0.245473000  |
| S  | 3.019503000  | -0.671447000 | -1.830373000 |
| S  | 0.035774000  | -3.179377000 | 2.067306000  |
| S  | -0.479172000 | -3.683790000 | -2.301879000 |
| C  | -2.714337000 | -2.295067000 | -3.181971000 |
| C  | -3.731028000 | -1.346843000 | -3.030062000 |
| C  | -3.947766000 | -0.696017000 | -1.809445000 |
| C  | -3.161752000 | -1.020679000 | -0.686248000 |
| C  | -2.121722000 | -1.951102000 | -0.872387000 |
| C  | -1.872207000 | -2.599409000 | -2.094405000 |
| H  | -2.544342000 | -2.774925000 | -4.139257000 |
| H  | -4.355454000 | -1.096680000 | -3.882099000 |
| H  | -4.746830000 | 0.032097000  | -1.717726000 |
| H  | -1.477816000 | -2.180100000 | -0.028829000 |
| S  | -2.838866000 | 3.628385000  | 1.317878000  |
| Li | -0.027657000 | -4.197610000 | -0.027224000 |
| Li | 1.061125000  | 0.695090000  | -1.564176000 |



|    |              |              |              |
|----|--------------|--------------|--------------|
| Li | -1.283948000 | -1.168246000 | 2.123586000  |
| Li | -1.883402000 | 1.542987000  | 1.482319000  |
| Li | 2.617183000  | 1.198994000  | 1.429613000  |
| Li | 3.568301000  | 1.667275000  | -1.458713000 |
| Li | -4.305012000 | 2.006048000  | 0.856212000  |
| Li | -0.577788000 | 3.856869000  | 1.971563000  |
| Li | -1.582952000 | 3.698812000  | -0.579860000 |
| Li | 1.118118000  | -1.901773000 | -2.829600000 |
| Li | -1.667345000 | -0.322769000 | -2.587595000 |

### III-Li<sub>12</sub>

|   |              |              |              |
|---|--------------|--------------|--------------|
| C | 2.203856000  | 3.263126000  | 0.284959000  |
| C | 1.143897000  | 3.027238000  | 1.338158000  |
| C | 0.438522000  | 1.770466000  | 1.025848000  |
| C | 0.093862000  | 1.573179000  | -0.289161000 |
| C | 0.387882000  | 2.703086000  | -1.241157000 |
| C | 1.775743000  | 3.196819000  | -1.007719000 |
| H | 1.528948000  | 3.098885000  | 2.360983000  |
| H | -0.408592000 | 0.642040000  | -0.598287000 |
| H | 0.137308000  | 2.564006000  | -2.304299000 |
| H | 2.448717000  | 3.400994000  | -1.846727000 |
| S | -0.079194000 | 0.794320000  | 2.448113000  |
| S | -3.521010000 | -0.445278000 | 0.900187000  |
| C | 1.424719000  | -2.173864000 | 1.579239000  |
| C | 2.488470000  | -1.922776000 | 2.459649000  |
| C | 3.598130000  | -1.208360000 | 2.018878000  |
| C | 3.689407000  | -0.749922000 | 0.696565000  |
| C | 2.633411000  | -0.983750000 | -0.198260000 |
| C | 1.506525000  | -1.666558000 | 0.277342000  |
| H | 2.435290000  | -2.292803000 | 3.477682000  |
| H | 4.428701000  | -1.032349000 | 2.697699000  |
| H | 4.599758000  | -0.262321000 | 0.357302000  |
| H | 0.659389000  | -1.790525000 | -0.394327000 |
| S | 3.923072000  | 3.114277000  | 0.776084000  |
| S | 2.726762000  | -0.458309000 | -1.901430000 |
| S | 0.001892000  | -3.115959000 | 2.103438000  |
| S | -0.517799000 | -3.783019000 | -2.280185000 |
| C | -2.951623000 | -2.687869000 | -3.078884000 |
| C | -4.076138000 | -1.880683000 | -2.886271000 |
| C | -4.277100000 | -1.179802000 | -1.692583000 |

|    |              |              |              |
|----|--------------|--------------|--------------|
| C  | -3.343674000 | -1.298602000 | -0.651796000 |
| C  | -2.219434000 | -2.104506000 | -0.864870000 |
| C  | -1.992929000 | -2.808472000 | -2.056425000 |
| H  | -2.803760000 | -3.215066000 | -4.015069000 |
| H  | -4.805241000 | -1.785373000 | -3.685185000 |
| H  | -5.158246000 | -0.559617000 | -1.566397000 |
| H  | -1.480384000 | -2.174234000 | -0.074323000 |
| S  | -2.616871000 | 3.442920000  | 0.720788000  |
| Li | -0.045496000 | -4.152612000 | 0.004703000  |
| Li | 0.650214000  | 0.762441000  | -2.283233000 |
| Li | -1.423237000 | -1.211360000 | 2.111929000  |
| Li | -1.787567000 | 1.247252000  | 0.851603000  |
| Li | 2.593208000  | 1.288540000  | 1.750551000  |
| Li | 3.462862000  | 1.704986000  | -0.996223000 |
| Li | -4.244943000 | 1.883227000  | 0.575998000  |
| Li | -0.913044000 | 3.128690000  | 2.374894000  |
| Li | -0.363336000 | 4.231436000  | 0.115376000  |
| Li | 0.839329000  | -1.880408000 | -2.891157000 |
| Li | -2.130537000 | -0.382747000 | -2.899186000 |
| Li | -1.777842000 | 2.725359000  | -1.430186000 |

#### IV-Li

|   |              |              |              |
|---|--------------|--------------|--------------|
| C | 0.807523000  | 3.394284000  | 0.302532000  |
| C | 0.316180000  | 3.546920000  | 1.603944000  |
| C | -0.992664000 | 3.179494000  | 1.918312000  |
| C | -1.825524000 | 2.691241000  | 0.907981000  |
| C | -1.330503000 | 2.508998000  | -0.384799000 |
| C | -0.004320000 | 2.834932000  | -0.689628000 |
| H | 1.805501000  | 3.736511000  | 0.048450000  |
| H | 0.954478000  | 3.985340000  | 2.366728000  |
| H | -1.376992000 | 3.294119000  | 2.925817000  |
| H | -1.987090000 | 2.112654000  | -1.154879000 |
| C | 2.980823000  | -0.192981000 | -2.012170000 |
| C | 3.270366000  | -1.307627000 | -1.223550000 |
| C | 3.465067000  | -1.186977000 | 0.149161000  |
| C | 3.417119000  | 0.072872000  | 0.775435000  |
| C | 3.211655000  | 1.196360000  | -0.047329000 |
| C | 2.949667000  | 1.064961000  | -1.411942000 |
| H | 2.779204000  | -0.295883000 | -3.073440000 |
| H | 3.305048000  | -2.290501000 | -1.682872000 |

|    |              |              |              |
|----|--------------|--------------|--------------|
| H  | 3.633401000  | -2.068483000 | 0.759948000  |
| H  | 3.289227000  | 2.186546000  | 0.393899000  |
| C  | -2.180534000 | -0.572143000 | -0.442453000 |
| C  | -2.019202000 | -1.172885000 | -1.691237000 |
| C  | -3.134244000 | -1.649338000 | -2.383295000 |
| C  | -4.403931000 | -1.511408000 | -1.829087000 |
| C  | -4.572037000 | -0.890366000 | -0.592758000 |
| C  | -3.456832000 | -0.419446000 | 0.100003000  |
| H  | -1.324529000 | -0.216935000 | 0.119652000  |
| H  | -2.999684000 | -2.123774000 | -3.350006000 |
| H  | -5.270029000 | -1.880289000 | -2.368499000 |
| H  | -5.560907000 | -0.767760000 | -0.163261000 |
| C  | 0.409154000  | -4.370138000 | 0.553662000  |
| C  | 0.414107000  | -3.146138000 | -0.117038000 |
| C  | 0.551960000  | -1.961318000 | 0.595353000  |
| C  | 0.631402000  | -1.970431000 | 1.994745000  |
| C  | 0.650627000  | -3.205384000 | 2.661291000  |
| C  | 0.551729000  | -4.388215000 | 1.939889000  |
| H  | 0.283031000  | -5.296644000 | 0.001650000  |
| H  | 0.588597000  | -1.017270000 | 0.060937000  |
| H  | 0.727397000  | -3.219288000 | 3.742915000  |
| H  | 0.558563000  | -5.339270000 | 2.462731000  |
| S  | -3.558253000 | 2.377918000  | 1.225092000  |
| S  | -3.608720000 | 0.346288000  | 1.704936000  |
| S  | -0.374131000 | -1.270936000 | -2.388745000 |
| S  | 0.502701000  | 2.526484000  | -2.373712000 |
| S  | 2.578583000  | 2.554472000  | -2.330025000 |
| S  | 3.470615000  | 0.279648000  | 2.521874000  |
| S  | 0.214332000  | -3.199899000 | -1.896196000 |
| S  | 0.649099000  | -0.477893000 | 2.915394000  |
| Li | 1.453882000  | 1.250664000  | 1.596738000  |

#### IV-Li<sub>2</sub>

|   |              |              |              |
|---|--------------|--------------|--------------|
| C | -0.843210000 | -3.246462000 | 0.396475000  |
| C | -0.357014000 | -3.366936000 | 1.701621000  |
| C | 0.969773000  | -3.059767000 | 2.001151000  |
| C | 1.823847000  | -2.657354000 | 0.973247000  |
| C | 1.339727000  | -2.514224000 | -0.328169000 |
| C | 0.001826000  | -2.790164000 | -0.619792000 |
| H | -1.857807000 | -3.547672000 | 0.154471000  |

|   |              |              |              |
|---|--------------|--------------|--------------|
| H | -1.014496000 | -3.738098000 | 2.484387000  |
| H | 1.348446000  | -3.148016000 | 3.013382000  |
| H | 2.017098000  | -2.194276000 | -1.115852000 |
| C | -2.819080000 | 0.149176000  | -2.178548000 |
| C | -3.157889000 | 1.308102000  | -1.478972000 |
| C | -3.573006000 | 1.251380000  | -0.152760000 |
| C | -3.690160000 | 0.022129000  | 0.518294000  |
| C | -3.399636000 | -1.141714000 | -0.214611000 |
| C | -2.940360000 | -1.077986000 | -1.532685000 |
| H | -2.464350000 | 0.195423000  | -3.203023000 |
| H | -3.073666000 | 2.271969000  | -1.970893000 |
| H | -3.805929000 | 2.168583000  | 0.381296000  |
| H | -3.565063000 | -2.111413000 | 0.250281000  |
| C | 2.318489000  | 0.536369000  | -0.439085000 |
| C | 2.160544000  | 1.155670000  | -1.679734000 |
| C | 3.275977000  | 1.647627000  | -2.360784000 |
| C | 4.543737000  | 1.506089000  | -1.804095000 |
| C | 4.709376000  | 0.865475000  | -0.577178000 |
| C | 3.594187000  | 0.380474000  | 0.105637000  |
| H | 1.465261000  | 0.166580000  | 0.117757000  |
| H | 3.143040000  | 2.134442000  | -3.321543000 |
| H | 5.410468000  | 1.885906000  | -2.334913000 |
| H | 5.697455000  | 0.738966000  | -0.146943000 |
| C | -0.449054000 | 4.296852000  | 0.557069000  |
| C | -0.365713000 | 3.078150000  | -0.127000000 |
| C | -0.431525000 | 1.879150000  | 0.566714000  |
| C | -0.455270000 | 1.854668000  | 1.970261000  |
| C | -0.547360000 | 3.081680000  | 2.649813000  |
| C | -0.569795000 | 4.284702000  | 1.939913000  |
| H | -0.397102000 | 5.235869000  | 0.014925000  |
| H | -0.428443000 | 0.941333000  | 0.019996000  |
| H | -0.526217000 | 3.090854000  | 3.737320000  |
| H | -0.630766000 | 5.224183000  | 2.480433000  |
| S | 3.574352000  | -2.418532000 | 1.261638000  |
| S | 3.746451000  | -0.387027000 | 1.710859000  |
| S | 0.522592000  | 1.246882000  | -2.398417000 |
| S | -0.465288000 | -2.576359000 | -2.330841000 |
| S | -2.534723000 | -2.624087000 | -2.338183000 |
| S | -4.100848000 | -0.132971000 | 2.238722000  |
| S | -0.106290000 | 3.161319000  | -1.896146000 |
| S | -0.335092000 | 0.317372000  | 2.858090000  |

|    |              |              |             |
|----|--------------|--------------|-------------|
| Li | -1.878726000 | -1.053719000 | 1.711847000 |
| Li | -2.443555000 | 1.267478000  | 3.097053000 |

#### IV-Li<sub>3</sub>

|   |              |              |              |
|---|--------------|--------------|--------------|
| C | -0.598223000 | -3.199340000 | -0.052168000 |
| C | -0.382471000 | -3.563476000 | 1.282195000  |
| C | 0.737985000  | -3.108695000 | 1.974506000  |
| C | 1.704635000  | -2.314677000 | 1.326459000  |
| C | 1.464566000  | -1.921309000 | 0.000005000  |
| C | 0.316642000  | -2.348588000 | -0.678552000 |
| H | -1.446096000 | -3.590728000 | -0.603531000 |
| H | -1.089490000 | -4.226192000 | 1.774997000  |
| H | 0.895553000  | -3.391651000 | 3.010307000  |
| H | 2.189478000  | -1.293268000 | -0.511511000 |
| C | -2.634010000 | 0.660449000  | -2.117610000 |
| C | -3.127315000 | 1.587286000  | -1.199533000 |
| C | -3.504163000 | 1.198580000  | 0.083200000  |
| C | -3.435195000 | -0.147505000 | 0.477253000  |
| C | -3.001654000 | -1.078246000 | -0.478026000 |
| C | -2.558552000 | -0.678740000 | -1.739678000 |
| H | -2.307691000 | 0.967725000  | -3.105105000 |
| H | -3.192703000 | 2.634611000  | -1.480176000 |
| H | -3.858921000 | 1.945102000  | 0.790122000  |
| H | -3.028464000 | -2.133709000 | -0.229017000 |
| C | 2.619689000  | 1.436031000  | -0.580821000 |
| C | 2.159170000  | 1.228708000  | -1.878482000 |
| C | 2.876713000  | 0.415832000  | -2.759266000 |
| C | 4.047861000  | -0.199972000 | -2.319537000 |
| C | 4.487357000  | -0.037771000 | -1.011098000 |
| C | 3.761328000  | 0.768144000  | -0.121893000 |
| H | 2.087982000  | 2.093104000  | 0.097947000  |
| H | 2.517671000  | 0.261572000  | -3.771941000 |
| H | 4.610015000  | -0.827890000 | -3.003154000 |
| H | 5.369739000  | -0.556386000 | -0.652249000 |
| C | -1.041033000 | 4.273471000  | 0.759772000  |
| C | -0.448183000 | 3.198057000  | 0.084226000  |
| C | -0.288842000 | 1.972289000  | 0.721033000  |
| C | -0.587117000 | 1.843682000  | 2.084085000  |
| C | -1.151284000 | 2.931855000  | 2.765793000  |
| C | -1.404106000 | 4.128163000  | 2.090097000  |

|    |              |              |              |
|----|--------------|--------------|--------------|
| H  | -1.195130000 | 5.219212000  | 0.249268000  |
| H  | 0.100563000  | 1.114172000  | 0.176540000  |
| H  | -1.318146000 | 2.870225000  | 3.840486000  |
| H  | -1.850276000 | 4.963121000  | 2.620876000  |
| S  | 3.176193000  | -1.862912000 | 2.199751000  |
| S  | 4.200620000  | 0.823164000  | 1.583142000  |
| S  | 0.544437000  | 1.756966000  | -2.437134000 |
| S  | 0.156897000  | -1.789877000 | -2.371695000 |
| S  | -1.873459000 | -1.940957000 | -2.806230000 |
| S  | -3.796788000 | -0.737446000 | 2.117142000  |
| S  | 0.182135000  | 3.571006000  | -1.545441000 |
| S  | -0.225380000 | 0.321521000  | 2.953537000  |
| Li | -1.441008000 | -1.351965000 | 1.591653000  |
| Li | -2.507662000 | 0.820869000  | 3.179822000  |
| Li | 2.137859000  | 0.213940000  | 2.634346000  |

#### IV-Li<sub>4</sub>

|   |              |              |              |
|---|--------------|--------------|--------------|
| C | 0.826782000  | -3.615337000 | 0.088909000  |
| C | 0.673610000  | -3.958109000 | -1.253282000 |
| C | -0.375334000 | -3.432670000 | -2.011979000 |
| C | -1.309216000 | -2.550444000 | -1.435724000 |
| C | -1.092890000 | -2.141792000 | -0.104958000 |
| C | -0.047404000 | -2.681564000 | 0.653302000  |
| H | 1.622508000  | -4.046567000 | 0.687098000  |
| H | 1.366720000  | -4.658849000 | -1.709276000 |
| H | -0.508179000 | -3.731853000 | -3.046578000 |
| H | -1.756376000 | -1.405882000 | 0.349273000  |
| C | 2.892722000  | 0.437877000  | 2.089518000  |
| C | 3.357180000  | 1.367347000  | 1.160173000  |
| C | 3.601437000  | 1.003064000  | -0.162065000 |
| C | 3.421896000  | -0.321748000 | -0.587469000 |
| C | 3.033970000  | -1.262662000 | 0.375353000  |
| C | 2.724025000  | -0.884930000 | 1.681678000  |
| H | 2.663201000  | 0.729017000  | 3.109266000  |
| H | 3.500830000  | 2.400498000  | 1.463073000  |
| H | 3.933304000  | 1.755605000  | -0.873924000 |
| H | 2.983310000  | -2.307284000 | 0.092185000  |
| C | -2.507772000 | 1.404098000  | 0.770490000  |
| C | -1.988102000 | 0.921454000  | 1.966709000  |
| C | -2.695015000 | -0.021959000 | 2.725975000  |

|    |              |              |              |
|----|--------------|--------------|--------------|
| C  | -3.927522000 | -0.464217000 | 2.266462000  |
| C  | -4.440834000 | -0.005101000 | 1.051236000  |
| C  | -3.723865000 | 0.914722000  | 0.259583000  |
| H  | -1.982445000 | 2.164268000  | 0.203222000  |
| H  | -2.288912000 | -0.386212000 | 3.663552000  |
| H  | -4.504038000 | -1.164364000 | 2.862863000  |
| H  | -5.441825000 | -0.309096000 | 0.742187000  |
| C  | 1.301450000  | 4.076107000  | -0.386881000 |
| C  | 0.642735000  | 2.979670000  | 0.185481000  |
| C  | 0.364565000  | 1.852712000  | -0.576461000 |
| C  | 0.611914000  | 1.851000000  | -1.955485000 |
| C  | 1.244060000  | 2.962722000  | -2.532230000 |
| C  | 1.612051000  | 4.052452000  | -1.738336000 |
| H  | 1.548850000  | 4.942265000  | 0.219075000  |
| H  | -0.083087000 | 0.974875000  | -0.117419000 |
| H  | 1.375506000  | 3.010971000  | -3.612730000 |
| H  | 2.108217000  | 4.904632000  | -2.191750000 |
| S  | -2.678986000 | -2.003543000 | -2.404605000 |
| S  | -4.265975000 | 1.347345000  | -1.374162000 |
| S  | -0.335837000 | 1.297465000  | 2.542265000  |
| S  | 0.065967000  | -2.147898000 | 2.355648000  |
| S  | 2.111513000  | -2.156985000 | 2.777290000  |
| S  | 3.611115000  | -0.874442000 | -2.270098000 |
| S  | 0.088123000  | 3.192491000  | 1.870106000  |
| S  | 0.093777000  | 0.465708000  | -2.956637000 |
| Li | 1.243315000  | -1.452940000 | -1.801348000 |
| Li | 2.389485000  | 0.822521000  | -3.198778000 |
| Li | -2.279001000 | 0.368568000  | -2.460608000 |
| Li | -4.278925000 | -0.968297000 | -1.091598000 |

#### IV-Li<sub>5</sub>

|   |              |              |              |
|---|--------------|--------------|--------------|
| C | -0.901070000 | -2.875455000 | -2.297220000 |
| C | -0.965377000 | -4.047296000 | -1.548219000 |
| C | -0.161177000 | -4.220067000 | -0.420943000 |
| C | 0.741544000  | -3.215735000 | -0.021678000 |
| C | 0.788267000  | -2.028426000 | -0.778700000 |
| C | -0.025934000 | -1.841291000 | -1.913630000 |
| H | -1.534507000 | -2.735787000 | -3.166968000 |
| H | -1.669974000 | -4.824412000 | -1.826107000 |
| H | -0.227892000 | -5.127061000 | 0.169902000  |

|    |              |              |              |
|----|--------------|--------------|--------------|
| H  | 1.469549000  | -1.228729000 | -0.487927000 |
| C  | -3.725299000 | 1.906705000  | -0.388883000 |
| C  | -4.454354000 | 1.449847000  | 0.697607000  |
| C  | -4.515277000 | 0.087233000  | 1.004449000  |
| C  | -3.844830000 | -0.855965000 | 0.202789000  |
| C  | -3.157763000 | -0.382062000 | -0.930037000 |
| C  | -3.082813000 | 0.981180000  | -1.231409000 |
| H  | -3.662636000 | 2.967219000  | -0.609558000 |
| H  | -4.982532000 | 2.162323000  | 1.325508000  |
| H  | -5.144221000 | -0.258851000 | 1.824971000  |
| H  | -2.710371000 | -1.093954000 | -1.617854000 |
| C  | 3.198976000  | 1.065611000  | 0.320986000  |
| C  | 2.976227000  | 1.341085000  | -1.020375000 |
| C  | 3.538464000  | 0.549024000  | -2.028068000 |
| C  | 4.361696000  | -0.504342000 | -1.656745000 |
| C  | 4.580178000  | -0.798377000 | -0.309192000 |
| C  | 3.955798000  | -0.054933000 | 0.710417000  |
| H  | 2.785988000  | 1.700646000  | 1.098082000  |
| H  | 3.343938000  | 0.760911000  | -3.074170000 |
| H  | 4.844075000  | -1.102861000 | -2.422792000 |
| H  | 5.298111000  | -1.578536000 | -0.049400000 |
| C  | -0.769547000 | 3.878947000  | 1.494947000  |
| C  | 0.165696000  | 3.053457000  | 0.870939000  |
| C  | 0.100514000  | 1.665841000  | 1.040633000  |
| C  | -0.846686000 | 1.084887000  | 1.895124000  |
| C  | -1.756481000 | 1.928784000  | 2.542497000  |
| C  | -1.726595000 | 3.301607000  | 2.325788000  |
| H  | -0.737571000 | 4.952778000  | 1.344409000  |
| H  | 0.844398000  | 1.014406000  | 0.586764000  |
| H  | -2.483387000 | 1.507183000  | 3.230313000  |
| H  | -2.453099000 | 3.937085000  | 2.822723000  |
| S  | 1.685723000  | -3.461903000 | 1.455136000  |
| S  | 4.013959000  | -0.547493000 | 2.414053000  |
| S  | 1.877808000  | 2.644218000  | -1.598805000 |
| S  | 0.043608000  | -0.348075000 | -2.850478000 |
| S  | -2.216397000 | 1.540480000  | -2.673199000 |
| S  | -3.759493000 | -2.572097000 | 0.668004000  |
| S  | 1.522085000  | 3.863165000  | 0.027731000  |
| S  | -0.763499000 | -0.656096000 | 2.237548000  |
| Li | -1.431944000 | -2.192520000 | 0.208427000  |
| Li | -3.028118000 | -1.223438000 | 2.367254000  |



|    |              |              |              |
|----|--------------|--------------|--------------|
| Li | 1.606725000  | -1.261116000 | 2.462559000  |
| Li | 3.740248000  | -2.485607000 | 1.167186000  |
| Li | -0.315418000 | 1.406317000  | -1.336830000 |

**IV-Li<sub>6</sub>**

|   |              |              |              |
|---|--------------|--------------|--------------|
| C | -0.839042000 | -2.897854000 | -2.262269000 |
| C | -0.928578000 | -4.054317000 | -1.488975000 |
| C | -0.094285000 | -4.246097000 | -0.388769000 |
| C | 0.871641000  | -3.277280000 | -0.049849000 |
| C | 0.960593000  | -2.120365000 | -0.847172000 |
| C | 0.112023000  | -1.909911000 | -1.952277000 |
| H | -1.511812000 | -2.750528000 | -3.100555000 |
| H | -1.688221000 | -4.794060000 | -1.720561000 |
| H | -0.184277000 | -5.134710000 | 0.226121000  |
| H | 1.697401000  | -1.353276000 | -0.607194000 |
| C | -4.129614000 | 2.173143000  | -0.185494000 |
| C | -4.901476000 | 1.492213000  | 0.741792000  |
| C | -4.777638000 | 0.108512000  | 0.907881000  |
| C | -3.868031000 | -0.619984000 | 0.121801000  |
| C | -3.084291000 | 0.094101000  | -0.804549000 |
| C | -3.200206000 | 1.479702000  | -0.982374000 |
| H | -4.231639000 | 3.245572000  | -0.314028000 |
| H | -5.625161000 | 2.037685000  | 1.341282000  |
| H | -5.436540000 | -0.425373000 | 1.590110000  |
| H | -2.368813000 | -0.475985000 | -1.401093000 |
| C | 3.334670000  | 1.016751000  | 0.335030000  |
| C | 3.137258000  | 1.285439000  | -1.011636000 |
| C | 3.736333000  | 0.499444000  | -2.003115000 |
| C | 4.569117000  | -0.538002000 | -1.610077000 |
| C | 4.759066000  | -0.827214000 | -0.256937000 |
| C | 4.095650000  | -0.093289000 | 0.745197000  |
| H | 2.896802000  | 1.648540000  | 1.100822000  |
| H | 3.558593000  | 0.702132000  | -3.053700000 |
| H | 5.079652000  | -1.129641000 | -2.363126000 |
| H | 5.482197000  | -1.595433000 | 0.023762000  |
| C | -0.775284000 | 3.783585000  | 1.294232000  |
| C | 0.238699000  | 2.971394000  | 0.787731000  |
| C | 0.208656000  | 1.590541000  | 1.004609000  |
| C | -0.786837000 | 1.006826000  | 1.799820000  |
| C | -1.780011000 | 1.836666000  | 2.330552000  |

|    |              |              |              |
|----|--------------|--------------|--------------|
| C  | -1.782052000 | 3.200685000  | 2.058230000  |
| H  | -0.775340000 | 4.848675000  | 1.090370000  |
| H  | 0.996919000  | 0.949169000  | 0.619691000  |
| H  | -2.552776000 | 1.418561000  | 2.969521000  |
| H  | -2.579257000 | 3.822055000  | 2.454034000  |
| S  | 1.839316000  | -3.525488000 | 1.410191000  |
| S  | 4.106366000  | -0.592441000 | 2.448247000  |
| S  | 2.033240000  | 2.569609000  | -1.618451000 |
| S  | 0.259880000  | -0.429972000 | -2.915608000 |
| S  | -2.228507000 | 2.375609000  | -2.177756000 |
| S  | -3.660247000 | -2.374875000 | 0.359378000  |
| S  | 1.620054000  | 3.789561000  | -0.004922000 |
| S  | -0.692886000 | -0.724822000 | 2.190532000  |
| Li | -1.274855000 | -2.221446000 | 0.141339000  |
| Li | -2.998852000 | -1.156111000 | 2.180023000  |
| Li | 1.696772000  | -1.326485000 | 2.422864000  |
| Li | 3.877592000  | -2.509186000 | 1.159228000  |
| Li | -0.214202000 | 1.383348000  | -1.398001000 |
| Li | -1.822998000 | 0.489817000  | -3.471229000 |

#### IV-Li<sub>7</sub>

|   |              |              |              |
|---|--------------|--------------|--------------|
| C | -2.431837000 | 2.659733000  | 2.204421000  |
| C | -2.838525000 | 3.682309000  | 1.348448000  |
| C | -1.957960000 | 4.232438000  | 0.416401000  |
| C | -0.625716000 | 3.776523000  | 0.338303000  |
| C | -0.234147000 | 2.738562000  | 1.206871000  |
| C | -1.114417000 | 2.168639000  | 2.147151000  |
| H | -3.133314000 | 2.231472000  | 2.912451000  |
| H | -3.866919000 | 4.027268000  | 1.382823000  |
| H | -2.282995000 | 5.019136000  | -0.255441000 |
| H | 0.778068000  | 2.341935000  | 1.147761000  |
| C | -3.383731000 | -3.359501000 | 0.718842000  |
| C | -4.502004000 | -3.048437000 | -0.046904000 |
| C | -4.746007000 | -1.745194000 | -0.473925000 |
| C | -3.856607000 | -0.713822000 | -0.152764000 |
| C | -2.715587000 | -1.042597000 | 0.604189000  |
| C | -2.467624000 | -2.353109000 | 1.046929000  |
| H | -3.209680000 | -4.371919000 | 1.067323000  |
| H | -5.205703000 | -3.834307000 | -0.305862000 |
| H | -5.632943000 | -1.512464000 | -1.053986000 |

|                          |              |              |              |
|--------------------------|--------------|--------------|--------------|
| H                        | -1.961741000 | -0.275377000 | 0.793419000  |
| C                        | 3.254420000  | 0.279153000  | 0.279059000  |
| C                        | 3.694691000  | -0.875560000 | 0.937978000  |
| C                        | 5.062766000  | -1.164294000 | 0.979936000  |
| C                        | 5.962164000  | -0.311702000 | 0.350804000  |
| C                        | 5.516974000  | 0.812563000  | -0.336524000 |
| C                        | 4.151132000  | 1.120122000  | -0.386753000 |
| H                        | 2.189488000  | 0.508013000  | 0.250134000  |
| H                        | 5.401883000  | -2.059001000 | 1.490161000  |
| H                        | 7.023824000  | -0.536919000 | 0.378543000  |
| H                        | 6.219512000  | 1.456427000  | -0.854884000 |
| C                        | -0.187883000 | -3.620586000 | -1.749613000 |
| C                        | 0.919733000  | -2.796484000 | -1.478310000 |
| C                        | 0.780689000  | -1.402255000 | -1.613588000 |
| C                        | -0.434320000 | -0.828902000 | -1.994415000 |
| C                        | -1.509193000 | -1.679108000 | -2.299642000 |
| C                        | -1.387510000 | -3.055989000 | -2.175566000 |
| H                        | -0.087361000 | -4.698529000 | -1.652777000 |
| H                        | 1.644768000  | -0.774356000 | -1.418381000 |
| H                        | -2.475269000 | -1.283528000 | -2.607618000 |
| H                        | -2.239753000 | -3.691031000 | -2.395894000 |
| S                        | 0.457141000  | 4.473764000  | -0.872983000 |
| S                        | 3.607305000  | 2.516050000  | -1.346745000 |
| S                        | 2.563502000  | -2.010041000 | 1.681673000  |
| S                        | -0.575136000 | 0.882266000  | 3.238579000  |
| S                        | -1.069943000 | -2.730953000 | 2.104453000  |
| S                        | -4.190662000 | 0.951493000  | -0.691665000 |
| S                        | 2.423957000  | -3.504167000 | -0.866962000 |
| S                        | -0.616907000 | 0.946152000  | -2.077429000 |
| Li                       | -2.044273000 | 1.895221000  | -0.102319000 |
| Li                       | -2.892844000 | 0.916689000  | -2.589941000 |
| Li                       | 1.291493000  | 2.373857000  | -1.857282000 |
| Li                       | 2.588734000  | 4.060482000  | -0.000626000 |
| Li                       | 0.531370000  | -0.823458000 | 1.999742000  |
| Li                       | -2.157266000 | -0.824908000 | 2.980045000  |
| Li                       | 0.689130000  | -3.453193000 | 0.699806000  |
| <b>IV-Li<sub>8</sub></b> |              |              |              |
| C                        | -3.715312000 | 2.232878000  | 0.979901000  |
| C                        | -3.888703000 | 2.844711000  | -0.264260000 |

|   |              |              |              |
|---|--------------|--------------|--------------|
| C | -2.811662000 | 3.422949000  | -0.937515000 |
| C | -1.527547000 | 3.424116000  | -0.354390000 |
| C | -1.368852000 | 2.806060000  | 0.895146000  |
| C | -2.446543000 | 2.214166000  | 1.584012000  |
| H | -4.559437000 | 1.778935000  | 1.487235000  |
| H | -4.872336000 | 2.845249000  | -0.724005000 |
| H | -2.952920000 | 3.894813000  | -1.903780000 |
| H | -0.391533000 | 2.823357000  | 1.373229000  |
| C | -1.165907000 | -3.684848000 | 0.824126000  |
| C | -1.754030000 | -4.035996000 | -0.383214000 |
| C | -2.677184000 | -3.194834000 | -1.006628000 |
| C | -3.001539000 | -1.947550000 | -0.446816000 |
| C | -2.355151000 | -1.586765000 | 0.751034000  |
| C | -1.470069000 | -2.448887000 | 1.410444000  |
| H | -0.466441000 | -4.352385000 | 1.315916000  |
| H | -1.508953000 | -4.990430000 | -0.839039000 |
| H | -3.185658000 | -3.520535000 | -1.912278000 |
| H | -2.553209000 | -0.586761000 | 1.145009000  |
| C | 2.782067000  | 1.271817000  | 0.520960000  |
| C | 3.227226000  | 0.585776000  | 1.668942000  |
| C | 4.558745000  | 0.118262000  | 1.679800000  |
| C | 5.387172000  | 0.322723000  | 0.576172000  |
| C | 4.932238000  | 1.009745000  | -0.553282000 |
| C | 3.623099000  | 1.532688000  | -0.583645000 |
| H | 1.740028000  | 1.592801000  | 0.484708000  |
| H | 4.916229000  | -0.426212000 | 2.546334000  |
| H | 6.399703000  | -0.068999000 | 0.589991000  |
| H | 5.585149000  | 1.177899000  | -1.402053000 |
| C | 1.396012000  | -3.453780000 | -2.094733000 |
| C | 1.459982000  | -2.541250000 | -1.025023000 |
| C | 0.760567000  | -1.331197000 | -1.137429000 |
| C | 0.073978000  | -0.990061000 | -2.312528000 |
| C | 0.046686000  | -1.905611000 | -3.374076000 |
| C | 0.693646000  | -3.138303000 | -3.246907000 |
| H | 1.919340000  | -4.399707000 | -2.006421000 |
| H | 0.749764000  | -0.631236000 | -0.302071000 |
| H | -0.426495000 | -1.626123000 | -4.313483000 |
| H | 0.668152000  | -3.843157000 | -4.072541000 |
| S | -0.201366000 | 4.213409000  | -1.219042000 |
| S | 3.113946000  | 2.520216000  | -1.958474000 |
| S | 2.183091000  | 0.241345000  | 3.040960000  |

|    |              |              |              |
|----|--------------|--------------|--------------|
| S  | -2.210377000 | 1.539527000  | 3.208693000  |
| S  | -0.782472000 | -2.022512000 | 3.005923000  |
| S  | -4.123004000 | -0.833383000 | -1.260233000 |
| S  | 2.479529000  | -2.920812000 | 0.382468000  |
| S  | -0.796573000 | 0.563389000  | -2.475148000 |
| Li | -2.588661000 | 0.988873000  | -0.829712000 |
| Li | -2.299965000 | -1.250409000 | -2.613775000 |
| Li | 0.739404000  | 2.294474000  | -2.315522000 |
| Li | 1.981324000  | 3.953771000  | -0.479905000 |
| Li | -0.165846000 | 0.400183000  | 2.830481000  |
| Li | -2.747905000 | -0.742688000 | 3.231626000  |
| Li | 1.501362000  | -1.947256000 | 2.305892000  |
| Li | 3.507193000  | -0.912686000 | -0.158968000 |

**IV-Li<sub>9</sub>**

|   |              |              |              |
|---|--------------|--------------|--------------|
| C | -2.436187000 | 2.840528000  | 2.415714000  |
| C | -2.598330000 | 3.890353000  | 1.513444000  |
| C | -1.583913000 | 4.230448000  | 0.618047000  |
| C | -0.365000000 | 3.520714000  | 0.619315000  |
| C | -0.217420000 | 2.457180000  | 1.532157000  |
| C | -1.234129000 | 2.110702000  | 2.445340000  |
| H | -3.237275000 | 2.575969000  | 3.097046000  |
| H | -3.540016000 | 4.429393000  | 1.486647000  |
| H | -1.715599000 | 5.044494000  | -0.086185000 |
| H | 0.718165000  | 1.902182000  | 1.544585000  |
| C | -3.689147000 | -3.121589000 | 0.561423000  |
| C | -4.773711000 | -2.719619000 | -0.206858000 |
| C | -4.986572000 | -1.373206000 | -0.514565000 |
| C | -4.105983000 | -0.386306000 | -0.045774000 |
| C | -2.988475000 | -0.815998000 | 0.702392000  |
| C | -2.763460000 | -2.166124000 | 1.014746000  |
| H | -3.530881000 | -4.167222000 | 0.803077000  |
| H | -5.476317000 | -3.463674000 | -0.570494000 |
| H | -5.856811000 | -1.072046000 | -1.089987000 |
| H | -2.231345000 | -0.087672000 | 0.999623000  |
| C | 2.835399000  | 0.220564000  | 0.115928000  |
| C | 3.264895000  | -0.757093000 | 0.993032000  |
| C | 4.665735000  | -1.002021000 | 1.188825000  |
| C | 5.586218000  | -0.180446000 | 0.482681000  |
| C | 5.171695000  | 0.808365000  | -0.379806000 |

|    |              |              |              |
|----|--------------|--------------|--------------|
| C  | 3.756327000  | 1.087565000  | -0.587074000 |
| H  | 1.765476000  | 0.326149000  | -0.070873000 |
| H  | 4.993092000  | -1.648053000 | 1.996442000  |
| H  | 6.651516000  | -0.326639000 | 0.644267000  |
| H  | 5.902655000  | 1.421974000  | -0.900473000 |
| C  | 0.828643000  | -3.643994000 | -1.870403000 |
| C  | 1.673582000  | -2.534662000 | -2.080738000 |
| C  | 1.079981000  | -1.265280000 | -2.140491000 |
| C  | -0.295224000 | -1.060434000 | -1.960932000 |
| C  | -1.119698000 | -2.184119000 | -1.777033000 |
| C  | -0.550999000 | -3.461882000 | -1.746259000 |
| H  | 1.258410000  | -4.639247000 | -1.822801000 |
| H  | 1.707035000  | -0.401815000 | -2.337236000 |
| H  | -2.191729000 | -2.075997000 | -1.635303000 |
| H  | -1.194671000 | -4.322791000 | -1.590432000 |
| S  | 0.877165000  | 3.977767000  | -0.550078000 |
| S  | 3.314869000  | 1.751276000  | -2.249212000 |
| S  | 2.141241000  | -1.952045000 | 1.716412000  |
| S  | -1.005721000 | 0.828820000  | 3.652299000  |
| S  | -1.338393000 | -2.672846000 | 1.956250000  |
| S  | -4.363660000 | 1.329043000  | -0.440294000 |
| S  | 3.428446000  | -2.737232000 | -2.253836000 |
| S  | -0.930610000 | 0.605306000  | -1.987947000 |
| Li | -2.111017000 | 1.995098000  | 0.077431000  |
| Li | -3.233831000 | 0.369869000  | -2.183571000 |
| Li | 0.958585000  | 2.130962000  | -2.040033000 |
| Li | 3.030990000  | 3.076076000  | -0.326022000 |
| Li | 0.310594000  | -0.828616000 | 2.606716000  |
| Li | -2.485867000 | -0.884429000 | 3.051382000  |
| Li | 4.188593000  | -0.451313000 | -2.114073000 |
| Li | 0.346464000  | -2.412687000 | 0.173127000  |
| Li | 3.731742000  | -2.710147000 | 0.064056000  |

#### IV-Li<sub>10</sub>

|   |              |             |             |
|---|--------------|-------------|-------------|
| C | -1.844121000 | 3.395343000 | 2.588709000 |
| C | -2.089926000 | 4.450887000 | 1.703378000 |
| C | -1.347487000 | 4.609732000 | 0.526948000 |
| C | -0.312764000 | 3.700291000 | 0.211719000 |
| C | -0.113004000 | 2.620672000 | 1.098710000 |
| C | -0.826554000 | 2.462767000 | 2.300250000 |

|   |              |              |              |
|---|--------------|--------------|--------------|
| H | -2.424722000 | 3.290279000  | 3.498333000  |
| H | -2.885005000 | 5.155536000  | 1.927882000  |
| H | -1.542047000 | 5.441962000  | -0.140617000 |
| H | 0.668315000  | 1.914212000  | 0.844901000  |
| C | -2.994904000 | -2.995898000 | 1.067541000  |
| C | -4.274164000 | -2.714612000 | 0.602705000  |
| C | -4.647453000 | -1.415552000 | 0.256831000  |
| C | -3.731470000 | -0.359334000 | 0.368071000  |
| C | -2.421046000 | -0.663848000 | 0.793801000  |
| C | -2.040483000 | -1.968453000 | 1.153396000  |
| H | -2.714695000 | -4.003773000 | 1.355807000  |
| H | -5.001807000 | -3.516445000 | 0.520366000  |
| H | -5.658498000 | -1.203267000 | -0.075893000 |
| H | -1.662934000 | 0.119848000  | 0.797478000  |
| C | 2.762413000  | -0.712339000 | 0.118181000  |
| C | 3.099497000  | -1.703820000 | 1.063336000  |
| C | 3.370599000  | -1.275229000 | 2.373698000  |
| C | 3.316710000  | 0.088154000  | 2.683376000  |
| C | 2.923591000  | 1.025604000  | 1.718112000  |
| C | 2.620461000  | 0.669589000  | 0.381507000  |
| H | 2.618079000  | -1.085968000 | -0.908985000 |
| H | 3.628964000  | -2.007660000 | 3.131754000  |
| H | 3.536972000  | 0.411652000  | 3.697405000  |
| H | 2.815389000  | 2.060939000  | 2.043267000  |
| C | 0.880963000  | -3.735282000 | -2.502130000 |
| C | 1.566653000  | -2.641707000 | -3.062667000 |
| C | 0.900460000  | -1.411072000 | -3.117029000 |
| C | -0.337165000 | -1.194363000 | -2.498863000 |
| C | -1.011455000 | -2.297833000 | -1.950503000 |
| C | -0.411564000 | -3.559469000 | -1.991750000 |
| H | 1.346828000  | -4.716575000 | -2.490374000 |
| H | 1.372778000  | -0.561589000 | -3.601082000 |
| H | -1.985399000 | -2.181591000 | -1.483560000 |
| H | -0.951140000 | -4.416379000 | -1.594119000 |
| S | 0.729905000  | 3.927180000  | -1.187162000 |
| S | 2.817673000  | 1.563475000  | -3.118912000 |
| S | 3.114648000  | -3.438416000 | 0.649215000  |
| S | -0.398952000 | 1.173303000  | 3.441736000  |
| S | -0.406592000 | -2.325826000 | 1.777144000  |
| S | -4.228777000 | 1.294270000  | -0.077301000 |
| S | 3.247108000  | -2.766531000 | -3.638671000 |

|    |              |              |              |
|----|--------------|--------------|--------------|
| S  | -0.910616000 | 0.485091000  | -2.329946000 |
| Li | -2.348824000 | 2.544125000  | 0.494114000  |
| Li | -3.156238000 | 0.380460000  | -1.877754000 |
| Li | 0.667828000  | 2.357227000  | -3.066924000 |
| Li | 2.770633000  | 2.491879000  | -0.987725000 |
| Li | 1.067667000  | -0.291378000 | 2.076524000  |
| Li | -1.659424000 | -0.708546000 | 3.043480000  |
| Li | 3.701767000  | -0.374582000 | -3.737278000 |
| Li | 0.916114000  | -2.983810000 | -0.098106000 |
| Li | 3.960996000  | -3.290186000 | -1.494284000 |
| Li | 1.525254000  | 0.536876000  | -1.448759000 |

#### IV-Li<sub>11</sub>

|   |              |              |              |
|---|--------------|--------------|--------------|
| C | -2.029627000 | 3.507629000  | 2.631091000  |
| C | -2.256151000 | 4.481129000  | 1.616659000  |
| C | -1.400154000 | 4.530879000  | 0.480165000  |
| C | -0.359417000 | 3.626135000  | 0.333730000  |
| C | -0.197210000 | 2.560874000  | 1.308206000  |
| C | -1.013572000 | 2.572241000  | 2.505933000  |
| H | -2.658258000 | 3.492555000  | 3.515778000  |
| H | -3.050105000 | 5.208216000  | 1.730200000  |
| H | -1.546064000 | 5.296364000  | -0.275057000 |
| H | 0.820588000  | 2.199076000  | 1.437256000  |
| C | -2.871109000 | -3.033858000 | 0.983797000  |
| C | -4.037018000 | -2.819634000 | 0.258353000  |
| C | -4.470897000 | -1.527721000 | -0.046686000 |
| C | -3.735323000 | -0.411992000 | 0.380644000  |
| C | -2.532172000 | -0.644219000 | 1.079620000  |
| C | -2.090054000 | -1.939535000 | 1.390087000  |
| H | -2.555303000 | -4.039136000 | 1.245251000  |
| H | -4.630567000 | -3.670425000 | -0.062800000 |
| H | -5.404150000 | -1.373060000 | -0.579985000 |
| H | -1.901645000 | 0.212022000  | 1.326472000  |
| C | 2.262171000  | -1.122053000 | 0.135015000  |
| C | 2.989333000  | -1.964047000 | 1.000697000  |
| C | 3.625303000  | -1.363405000 | 2.100540000  |
| C | 3.554498000  | 0.015753000  | 2.264915000  |
| C | 2.857164000  | 0.818823000  | 1.347184000  |
| C | 2.154649000  | 0.289989000  | 0.235572000  |
| H | 1.723546000  | -1.630361000 | -0.677028000 |



|    |              |              |              |
|----|--------------|--------------|--------------|
| H  | 4.170752000  | -1.982477000 | 2.804934000  |
| H  | 4.050319000  | 0.479130000  | 3.113775000  |
| H  | 2.857863000  | 1.893977000  | 1.542985000  |
| C  | 0.938657000  | -3.496767000 | -2.393824000 |
| C  | 1.568681000  | -2.446727000 | -3.083889000 |
| C  | 0.864925000  | -1.241998000 | -3.228467000 |
| C  | -0.327178000 | -0.985536000 | -2.540594000 |
| C  | -0.914804000 | -2.028078000 | -1.806843000 |
| C  | -0.300589000 | -3.281647000 | -1.783912000 |
| H  | 1.417064000  | -4.470196000 | -2.328381000 |
| H  | 1.287217000  | -0.444550000 | -3.833772000 |
| H  | -1.846204000 | -1.873186000 | -1.269828000 |
| H  | -0.802520000 | -4.105820000 | -1.276834000 |
| S  | 0.806567000  | 3.719155000  | -1.018414000 |
| S  | 3.073204000  | 1.617630000  | -3.155420000 |
| S  | 3.033521000  | -3.731621000 | 0.752334000  |
| S  | -0.586853000 | 1.398033000  | 3.777178000  |
| S  | -0.586424000 | -2.204799000 | 2.323917000  |
| S  | -4.293496000 | 1.236135000  | 0.008423000  |
| S  | 3.265975000  | -2.561748000 | -3.617383000 |
| S  | -0.972194000 | 0.670872000  | -2.545729000 |
| Li | -2.460908000 | 2.547073000  | 0.687125000  |
| Li | -3.168689000 | 0.524160000  | -1.833800000 |
| Li | 0.850621000  | 2.343088000  | -3.055766000 |
| Li | 2.750500000  | 2.321005000  | -0.955683000 |
| Li | 0.692195000  | 0.017690000  | 2.265757000  |
| Li | -1.881571000 | -0.468404000 | 3.408264000  |
| Li | 3.858941000  | -0.230518000 | -4.147552000 |
| Li | 0.767886000  | -3.107037000 | 0.617756000  |
| Li | 3.703170000  | -3.330515000 | -1.438329000 |
| Li | 2.346961000  | -0.063338000 | -1.853341000 |
| Li | 0.290091000  | 1.353851000  | -0.481433000 |

#### IV-Li<sub>12</sub>

|   |              |             |             |
|---|--------------|-------------|-------------|
| C | -1.959236000 | 3.555404000 | 2.453522000 |
| C | -2.277501000 | 4.256185000 | 1.277806000 |
| C | -1.392429000 | 4.325916000 | 0.207447000 |
| C | -0.116794000 | 3.739920000 | 0.322646000 |
| C | 0.179317000  | 3.032799000 | 1.496276000 |
| C | -0.731619000 | 2.875562000 | 2.555613000 |

|   |              |              |              |
|---|--------------|--------------|--------------|
| H | -2.653228000 | 3.536174000  | 3.291787000  |
| H | -3.241910000 | 4.751526000  | 1.203904000  |
| H | -1.656133000 | 4.862988000  | -0.696908000 |
| H | 1.173800000  | 2.622230000  | 1.620625000  |
| C | -2.359605000 | -2.931215000 | 1.249501000  |
| C | -3.536602000 | -2.938088000 | 0.409842000  |
| C | -4.063923000 | -1.731043000 | -0.004572000 |
| C | -3.483674000 | -0.482162000 | 0.326968000  |
| C | -2.417309000 | -0.437795000 | 1.406781000  |
| C | -1.801333000 | -1.766664000 | 1.702196000  |
| H | -2.002221000 | -3.878946000 | 1.657080000  |
| H | -3.962197000 | -3.876775000 | 0.076895000  |
| H | -4.957275000 | -1.721446000 | -0.627893000 |
| H | -1.603061000 | 0.303247000  | 1.177950000  |
| C | 1.861349000  | -1.067024000 | 0.229205000  |
| C | 2.588139000  | -2.033365000 | 0.962753000  |
| C | 3.482334000  | -1.568701000 | 1.940695000  |
| C | 3.636868000  | -0.200980000 | 2.145647000  |
| C | 2.904676000  | 0.722616000  | 1.383235000  |
| C | 1.974562000  | 0.340104000  | 0.383537000  |
| H | 1.130293000  | -1.454999000 | -0.492148000 |
| H | 4.036903000  | -2.285914000 | 2.536809000  |
| H | 4.328490000  | 0.152282000  | 2.906291000  |
| H | 3.070496000  | 1.779791000  | 1.614838000  |
| C | 0.693743000  | -3.333905000 | -2.640038000 |
| C | 1.429620000  | -2.255755000 | -3.155205000 |
| C | 0.813949000  | -0.996626000 | -3.195391000 |
| C | -0.399200000 | -0.743772000 | -2.550363000 |
| C | -1.091196000 | -1.821691000 | -1.975252000 |
| C | -0.560461000 | -3.106033000 | -2.070541000 |
| H | 1.093607000  | -4.345731000 | -2.686041000 |
| H | 1.330490000  | -0.170439000 | -3.673462000 |
| H | -2.028286000 | -1.674948000 | -1.446232000 |
| H | -1.130374000 | -3.939519000 | -1.665529000 |
| S | 1.107507000  | 3.859130000  | -0.954203000 |
| S | 3.259532000  | 1.588609000  | -2.941145000 |
| S | 2.314387000  | -3.776645000 | 0.735494000  |
| S | -0.301682000 | 1.843364000  | 3.927239000  |
| S | -0.505782000 | -1.843591000 | 2.946630000  |
| S | -4.526215000 | 1.014869000  | 0.244941000  |
| S | 3.170505000  | -2.419441000 | -3.528574000 |

|    |              |              |              |
|----|--------------|--------------|--------------|
| S  | -0.938699000 | 0.950971000  | -2.410103000 |
| Li | -2.875536000 | 1.741241000  | 1.644308000  |
| Li | -3.035430000 | 0.689160000  | -1.435412000 |
| Li | 1.058336000  | 2.406712000  | -2.945608000 |
| Li | 2.868300000  | 2.231650000  | -0.778697000 |
| Li | 0.888780000  | 0.121702000  | 2.649358000  |
| Li | -1.801125000 | 0.026302000  | 3.599615000  |
| Li | 3.950240000  | -0.179238000 | -4.115456000 |
| Li | 0.073312000  | -2.979988000 | 0.973525000  |
| Li | 2.937794000  | -3.541313000 | -1.473585000 |
| Li | 2.580721000  | -0.271210000 | -1.790974000 |
| Li | 0.335352000  | 1.518553000  | -0.410249000 |
| Li | -4.471832000 | -0.477915000 | 2.075574000  |

END-----

## Notes and references

- 1 G. Kresse and J. Hafner, *Phys. Rev. B: Condens. Matter Mater. Phys.*, 1993, **47**, 558-561.
- 2 G. Kresse and D. Joubert, *Phys. Rev. B: Condens. Matter Mater. Phys.*, 1999, **59**, 1758-1775.
- 3 P. E. Blöchl, *Phys. Rev. B: Condens. Matter Mater. Phys.*, 1994, **50**, 17953-17979.
- 4 J. P. Perdew, K. Burke and M. Ernzerhof, *Phys. Rev. Lett.*, 1996, **77**, 3865-3868.
- 5 S. Nosé, *J. Chem. Phys.*, 1984, **81**, 511-519.
